# Supplementary material for: From advocacy to action: civil society and development agencies engaging the private sector actors to improve nutrition in Africa
Source: Frontiers journal article supplement (doi:10.3389/fsufs.2025.1541076), 2025-08-01
Supplement: Table_1.docx [file Table_1.docx]

Annex I: Search Terms and Questions

Search terms used in Summons discovery.

| **Primary search term** | **Combined individually with** |
| --- | --- |
| Multi-stakeholder | Food |
|  | Nutrition |
|  |  |
| Multi stakeholder partnership | Food, Nutrition, Diets, Hunger |
| Multi stakeholder initiatives |
| Multi stakeholder platforms |
| Multi sectoral collaboration |

Search option used in Summons, All words anywhere:

(TitleCombined:(Multi-stakeholder food))

(TitleCombined:(Multi-stakeholder nutrition))

(TitleCombined:(Multi stakeholder partnership Food))

(TitleCombined:(Multi stakeholder partnership Nutrition))

(TitleCombined:(Multi stakeholder partnership Diets))

(TitleCombined:(Multi stakeholder partnership Hunger))

(TitleCombined:(Multi stakeholder initiatives Food))

(TitleCombined:(Multi stakeholder initiatives Nutrition))

(TitleCombined:(Multi stakeholder initiatives Diets))

(TitleCombined:(Multi stakeholder initiatives Hunger))

(TitleCombined:(Multi stakeholder platforms food))

(TitleCombined:(Multi stakeholder platforms nutrition))

(TitleCombined:(Multi stakeholder platforms Diets))

(TitleCombined:(Multi stakeholder platforms Hunger))

(TitleCombined:(Multi sectoral collaboration Food))

(TitleCombined:(Multi sectoral collaboration Nutrition))

(TitleCombined:(Multi sectoral collaboration Diets))

(TitleCombined:(Multi sectoral collaboration Hunger))

Questions for Chat GPT:

List various initiatives by public sector engaging the private sector for food security in Africa

List all global platform that brings together businesses, governments, and other stakeholders to address malnutrition

List all Africa platform that brings together businesses, governments, and other stakeholders to address malnutrition

List all global initiatives which engage private sector to improve nutrition

List all networks which engage both public and private sector for improving nutrition in Africa

List all multistakeholder initiatives to improve food security in Africa?

List all public private sector initiatives for Zero Hunger

List all public private sector alliances for zero hunger

Public private sector alliances for improved nutrition

List all Public private partnerships for nutrition in Africa

List all platforms in Africa engaging the private sector for nutrition

List all consortiums in Africa involving private sector for food security and nutrition

List all global consortiums involving private sector for food security and nutrition

List all global consortiums involving private sector for Zero Hunger

List global consortia engaging private sector for nutrition

List global consortia engaging private sector for zero hunger

List global consortia engaging private sector for food security

List all coalitions engaging the private sector for nutrition

List all global coalitions engaging the private sector for zero hunger

List all coalitions in Africa engaging the private sector for zero hunger

List all global forums engaging private sector for zero hunger

List all global public private alliances for zero hunger

List all public and private sector alliances in Africa for zero hunger

List all public and private sector alliances in Africa for nutrition

List all public private sector alliances for food security and nutrition

List all public private partnerships for global nutrition

List all public private partnerships for food security

List all global public private collaborations for zero hunger

List all global public private collaborations for food security

List all African public private collaborations for zero hunger

List all global public private collaborations for food security
