# Supplementary material for: From advocacy to action: civil society and development agencies engaging the private sector actors to improve nutrition in Africa
Source: Frontiers journal article supplement (doi:10.3389/fsufs.2025.1541076), 2025-08-01
Supplement: Table_2.docx [file Table_2.docx]

Annex III: Interview template

We are a group of consultants working with Tufts University to carry out a novel mapping of multi-stakeholder initiatives by which civil society organizations and development agencies engage with for-profit businesses for food system change in Africa. Our mapping is the first to provide a comprehensive catalogue of these efforts observed since 2015, and will describe the rapid growth of multi-stakeholder initiatives in terms of who is involved and what, where, and how they operate across Africa, summarizing their similarities and differences in terms of governance structure, objectives, magnitudes, and timelines of activity. We are systematically assessing organizations of interest to provide context and recommendations for any future initiatives that aim to engage the private sector for transforming African food systems.

We have identified [Name of the initiative] as an organization of interest for this forthcoming analysis and have carefully read the catalogue of publicly available information about your initiatives work. We believe that you can help us craft an accurate and rich characterization of the initiative in our forthcoming work, that will go beyond the information available in the public domain.

1. In addition to the information available on your website, what else would you like to tell us about the initiative, what you do and how do you do it?
2. Are there any descriptive documents about your work (what you do and your goals) in addition to what is on the website that you can send us? E.g. TOC, MEL framework
3. How would you describe the impact of your initiative? Where is the impact framework at the current stage?
4. What lessons would you want us to relay from your work in our reporting and for the future initiative?
5. Would you or others in your organization want to be part of a consortium that focuses on advancing use of data metrics (e.g cost of healthy diet) for food systems? Who would be the best representative for your organization on such a consortium?
6. Is there anything else you would like to share or comment?
