# Supplementary material for: From advocacy to action: civil society and development agencies engaging the private sector actors to improve nutrition in Africa
Source: Frontiers journal article supplement (doi:10.3389/fsufs.2025.1541076), 2025-08-01
Supplement: Table_3.xlsx [file Table_3.xlsx]

## Sheet: All Initiatives
Sno.	Name of the initiative (led by NGOs, Public sector, UN etc.)	Brief description of the initiative	Lead Organizations	Contact details of chair/leader (emails or linked in)	Donor/Funder of the initiative	Type of private sector engaged	Size of private sector engaged (Micro, small, medium, large, very large)	Food value chains that the engaged private sector actors are operating in (e.g. fruits, vegetables etc.)	Support provided to the private sector	Details of support provided e.g. nutrition education, food safety training, digital tools etc.	Year Founded	Maturity stage (Nascent, Emerging, Established)	Countries of operation	Overall goals (vision/mission)	Terms of reference (Pls provide a link if available)	Structure of the initiative	M&E framework (metrics of assessment)	Reported impact if any	Reported lessons learnt if any	Factors supporting or hindering progress of the initiative	Notes (any interesting things on website)	Link	Comments	Identification source
GLOBAL INITIATIVES WITH AFRICA PRESENCE
1	Agriculture for Nutrition and Health (A4NH) Program	A4NH is a global research program that addresses the role of agriculture in improving nutrition and health outcomes. It involves partnerships with governments, research institutions, and the private sector to promote agriculture practices that enhance nutrition and food security.	International Food Policy Research Institute/CGIAR research center	Not available/chaired by multiple committees	CGIAR fund, which is funded by: USAID,Government of the Netherlands, Irish Aid, UK AID, Australian Government, Swiss Government, French Government,	Sectors related to biofortification, integrated agriculture-nutrition programs and policies, and food safety.	All	Those related to biofortification, integrated agriculture-nutrition programs and policies, and food safety.	The program's focus is on improving agriculture development and nutrition, which indirectly benefits the private sector involved in these areas by maximizing health and nutrition benefits and reducing health risks	Research program whose findings support private sector companies	Circa 2011	Established	Over 30 countries; most significantly in Bangladesh, India,Ethiopia, Vietnam, Nigeria	Aims to start with the consumption of healthy, affordable, and safe foods rather than supply, offering an innovative perspective on the relationship between agriculture, nutrition, and health. It emphasizes integrating gender and equity, evaluation, and impact assessment into its research.	https://a4nh.cgiar.org/files/2014/03/Phase-II-Plans_-Exec-Summary_v4.pdf	please see diagram on page 2: https://a4nh.cgiar.org/files/2014/03/Phase-II-Plans_-Exec-Summary_v4.pdf	Varies. Focuses on 5 flagships of research, each with its own specifics	please see diagram on page 2: https://a4nh.cgiar.org/files/2014/03/Phase-II-Plans_-Exec-Summary_v4.pdf	they have strategic briefs outlining lessons learned- link through https://a4nh.cgiar.org/outcomes-and-impacts/	no information found	CGIAR’s only research program on nutrition and health. Most partners are Universities, CIGAR institutes, NGOs. Only Private sector actor mentioned specifically is UNILEVER	https://a4nh.cgiar.org	Focus on agriculture only - hence excluded	Chat GPT
2	Access to Nutrition Initiative (ATNI)	ATNI assesses and ranks the world's largest food and beverage manufacturers on their contributions to addressing global nutrition challenges. It encourages companies to improve their products, practices, and policies to support healthy diets and combat malnutrition.	NA/Global nonprofit	https://www.linkedin.com/in/gsgarrett/?originalSubdomain=ch	Bill & Melinda Gates foundation; WHO; UK Aid; Irish Aid; GAIN; PICTET; Rockefeller Foundation; Waterloo Foundation	Engages with the food and beverage industry, investors, policymakers, and strategic allies to drive improved nutritional outcome	The initiative engages with large multinational F&B companies, having assessed 252 companies and reviewed 66,104 products to gauge their impact on consumers' nutrition​	spans across various segments of the F&B industry, from baby food to general consumer products, focusing on improving nutritional content and accessibility	Provides benchmarking data and tools, advocates for nutrition-sensitive investments, and shapes policy formulation to support companies in delivering healthier diets​	Benchmarking and Indexing: Creating indexes like the Global Index, India Index, and UK Retailer Index to assess and rank F&B companies on their nutrition practices. Strategic Partnerships: Collaborating with investors, companies, and other stakeholders to foster healthier food markets​	2013	Established	At least 25	Vision is a world where markets contribute to providing access to nutritious and affordable diets for all, aiming for at least half of all food & beverage sales to be derived from healthy products by 2030.	https://accesstonutrition.org/news/why-access-to-nutrition-initiatives-new-strategy-aims-to-transform-markets-for-healthier-food/	hosted by the Access to Nutrition Foundation, which is a registered charity in The Netherlands; diverse board of directors composed of industry professionals; two independent expert groups - one for overseeing ATNI's influence over market and company behaviour, another for their work on BMS and CF	Utilizes various indexes and benchmarks, such as the Global Index, the India Index, and the UK Retailer Index, to assess and rank the world's largest food and beverage companies on their nutrition-related practices​	See impact stories here: https://accesstonutrition.org/old-impact/		One significant challenge is the lack of a standardized definition of "healthy" food, leading companies to apply varying criteria	Emphasizes accountability within the private sector for improving access to nutrition, using a variety of reports and tools to measure and encourage progress toward healthier products and practices​		Collaboration and Convening Commitment and Monitoring	Authors	1
3	Business Call to Action (BCtA)	BCtA is a global initiative that encourages businesses to develop innovative business models that contribute to the achievement of the Sustainable Development Goals (SDGs). It promotes inclusive business practices, including initiatives that improve access to nutritious food and address malnutrition in underserved communities	UNDP Initiative	https://www.linkedin.com/in/lucianaaguiar/	Asian Development Bank, german ministry for economic cooperation and development, Deutsche Gesellschaft für Internationale Zusammenarbeit (GIZ)	Works with businesses of all sizes that integrate low-income individuals in their core business as producers, suppliers, clients, customers, or employees	All sizes	No specified chains; businessess of all varieites are invited to participate	Offers various services such as impact measurement and management, inclusive innovation journeys, and a corporate tracker for the Sustainable Development Goals. They provide training, direct technical assistance, mentorship, and workshops tailored to different sizes and sectors of organizations​	Offers a suite of management tools for corporate sponsors, such as impact measurement and management, SDG tracking, inclusive business management and tracking tools	Circa 2010	Established	Over 200 company members in 67 countries	Encourage businesses to take collective action to improve the lives of people in low- and middle-income markets and contribute to the Sustainable Development Goals	No information found; however, as a UNDP initiative, the UNDP's strategic plan may be of use: https://www.undp.org/sites/g/files/zskgke326/files/2022-07/UNDP%20Strategic%20Plan%202022-2025.pdf	Once businesses apply and are accepted into the initiative, BCA provides them with access them tp the suite of tools and services that the BCA offers	Said tools and services are assessment tools for organizations: impact measurement and management, SDG tracking, inclusive business management and tracking tools	No information found	No information found	No information found; insights would be derived by use of the available resources that BCA provides	Supported by international partners like the Ministry of Foreign Affairs of the Netherlands, Swedish International Development Cooperation Agency, Asian Development Bank, among others	https://www.businesscalltoaction.org	Collaboration and Convening Commitment and Monitoring Capacity Building	Google	2
4	Business Platform for Nutrition Research (BPNR)	The Business Platform for Nutrition Research (BPNR), first announced at the Nutrition for Growth Summit of the G8 and formally launched at the UN General Assembly on September 23, 2013, is a multi-stakeholder platform for defining, funding and disseminating new research to improve nutrition in the developing world and for sharing existing knowledge which can impact the sector. Business Platform f…	Global Alliance for Improved Nutrition (GAIN)	Lynnette Neufeld at GAIN lneufeld@gainhealth.org	Government of Canada	Food, pharmaceutical and ingredients companies	Large The founding companies: Ajinomoto Arla Foods BASF Britannia Royal DSM GlaxoSmithKline Mars Inc Nutriset PepsiCo Unilever Together with the Global Alliance for Improved Nutrition (GAIN), have committed to work in partnership in response to a clear need for new evidence to tackle the underlying causes of and solutions to global malnutrition.	Not specified	Capacity building: Research Insights: The BPNR may provide businesses with access to the latest research findings and insights related to nutrition and its impact on various aspects of business operations, including product development, marketing strategies, and employee wellness programs. Technical Assistance: The BPNR might offer technical assistance to businesses seeking to implement nutrition…	The research streams include: (1) bioavailability, biomarkers and diagnostics to develop iron-fortified products and collect real time data on micronutrient deficiency; (2) integrated delivery models to develop new mechanisms for delivery of nutritious commodities to underserved populations; and (3) consumer behaviour change to define and develop cutting edge, cost-effective methodologies and too…	2013	Established	Africa, regional (33.00%) America, regional (33.00%) Asia, regional (34.00%)	Business Platform for Nutrition Research (the Platform) aims to address under-nutrition in developing countries.	No information found	No information found	The expected intermediate outcomes for the Business Platform for Nutrition Research include: (1) increased purchase and consumption of micronutrient-rich foods by the poor; and (2) improved ability to detect malnutrition risk and measure benefits of nutrition interventions. No more information found.	Defined: Specific research agenda Delivery model Governance structure Formally launched BPNR at the UN General Assembly in September 2013.	No information found	No information found	None	http://www.developmenthorizons.com/2017/06/innovative-funding-models-to-support.html https://globalnutritionreport.org/resources/nutrition-growth-commitment-tracking/global-alliance-for-improved-nutrition-gain/#:~:text=The%20Business%20Platform%20for%20Nutrition,research%20and%20development%20for%20nutrition. https://w05.international.gc.ca/projectbrowser-banqueprojets/project-projet/details/D000…	Not functional currently Collaboration and Convening Capacity Building	Chat GPT	3
5	EAT Foundation	The EAT Foundation is a non-profit organization that works to transform the global food system to promote healthy and sustainable diets. It engages with businesses, policymakers, and other stakeholders to advocate for changes in food production, distribution, and consumption patterns that support better nutrition outcomes.	Founded by Stordalen Foundation and Stockholm Resilience Centre	https://www.linkedin.com/in/tomas-alfred-røen-31516aa/?originalSubdomain=no	Not explicitly stated; see full breakdown of partners here https://eatforum.org/about/partnerships/	Collaborates with various stakeholders including policymakers, industry leaders, and the research community to drive change in the global food system.	All	All	Support policy and science to encourage a shift toward more sustainable and healthy food practices	Consists of 7 initiatives, which encompass Cities and Urban nutrition; financial stakeholder engagement strategizing; dialogue opportunities; European foodcapes; land use governance; and healthy cooking awareness	2013	Established	Global	A fair and sustainable global food system for healthy people and the planet, aiming for systemic change by 2050	Varied; Please see initiatives page for specific info on ToR for each initiative https://eatforum.org/initiatives/	Multilevel structure: globally, convene stakeholders for knowledge sharing, legislation, and advocacy; regionally, address specific issues through partner organizations and	Based on science and targeted actions, although specific metrics were not detailed, the foundation is committed to creating practical solutions that can be implemented on a large scale and within a short timeframe	worlds most cited' on website over 600 policy citations- people pay attention when reports are published	(IMO- partnering with a credible sceintific 'brand' is effective)	partnership with Lancet- highly credible paper	EAT's approach includes working across science, policy, and business sectors to achieve five radical food system transformations by 2050. They also host the EAT Stockholm Food Forum, a platform for experts and decision-makers to address food system challenges.	https://eatforum.org/knowledge/	Organization, hence excluded	Preliminary Google search
6	Food Fortification Initiative (FFI)	FFI is a global alliance that promotes the fortification of staple foods with essential vitamins and minerals to improve nutrition. It engages governments, industry partners, and other stakeholders to support the implementation of food fortification programs and address micronutrient deficiencies.	Based at Emory University	sjmontgom@gmail.com	No information found; no donors are listed however several 'partners' are. Please see: https://www.ffinetwork.org/partners	Food processors	Large	ndustrially milled wheat flour, maize flour, and rice	Provides technical assistance to governments, regional bodies, food producers, and implementing agencies	Offers technical assistance for planning, implementing, and monitoring grain fortification programs	2002	Established	Algeria, Angola, Azerbajan, Bangladesh, Botswana, Egypt, Georgia, India, Indonesia, Kazakhstan, Kyrgyzstan, Malaysia, Mauritius, Mongolia, Mozambique, Namibia, Papua new Guinea, Philippines, Senegal, South Africa, Sri Lanka, Tajikistan, Tunisia, Turkey, Turkmenistan, Uganda, Ukraine, UK, USA, Uzbekistan, Vietnam, Zimbabwe	Ensure high nutritional need countries seeking to implement national fortification programs are provided with the guidance and resources required to do so	Please see 3 phase plan here: https://www.ffinetwork.org/howwework-plan	Works to establish global standards on processing of grains. Research center based at Emory University, executive team coordinates data and legislates processes.	Data driven approach, comprehensive 4 stage approach to their work. More info available here https://www.ffinetwork.org/how-we-work-overview		Emphasizes the importance of public-private-civic partnerships for successful programs and the need for equity in access to fortified foods as key values guiding its work​			https://www.ffinetwork.org/	Focus only on one specific area - fortifcation, hence excluded	Chat GPT
7	Food Systems Countdown Initiative (FSCI) - Food Systems Dashboard (FSD)	Producing annual publications to measure, assess, and track the performance of global food systems toward 2030 and the conclusion of the Sustainable Development Goals.	GAIN, Columbia University, FAO, Cornell University	info@foodsystemsdashboard.org	Ministry of Foreign Affairs of the Netherlands.	"The FSD can be used by anyone interested or involved in the food system"	All sizes; does not directly engage with private sector; is an annual report/overview that measures the performance of global food system's path to meeting SDGs	All value chains	Measurement/report which can be utilized to understand how a business can better meet the SDGs	Please see indicators page to understand details of metrics assessed: https://www.foodcountdown.org/indicator-architecture	2021	Emerging	Global	working to build a science-based observational system using a food systems framework to track global food systems and their changes to 2030.	Indicators/metrics can be found here: https://www.foodcountdown.org/indicator-architecture	Organized by academics and multilateral institutions; overseen by several working groups and a chair committee	See framework here: https://www.foodcountdown.org/framework	None found	None found	The complexity of food systems that cut acorss continents, jurisdictions, and national borders has created a patchwork of different industries each with their own nuances		https://www.foodcountdown.org	Capacity building.	Authors	4
8	Food Systems Initiative, World Economic Forum (WEF)	The WEF Food Systems Initiative engages stakeholders from the public and private sectors to transform global food systems and achieve Zero Hunger. It facilitates dialogue, collaboration, and action to address food security challenges, promote sustainable agriculture, and improve nutrition outcomes	WEF	Cannot find information	World Economic Forum	Broad engagement across different sectors with a focus on innovation and sustainable practices	Large	Operates across all agricultural value chains	Supports the adoption of inclusive innovation and catalyzes institutional and social innovation along with technological solutions.	"Catalyze and support multistakeholder partnership platforms to deliver regional and country action at scale", and "Accelerate levers for change that can unlock systemic challenges and opportunities in food systems by generating insights, mobilizing collaboration, and delivering innovation";	Cannot find information	Established	Global	To achieve net-zero, nature-positive food systems that are inclusive and ensure nutrition for all.	None found	Run by the WEF; available information is not detailed; convenes high-level, multi-sectoral leadership "to support, strengthen and scale inclusive regional and country-led action, while advancing global knowledge, insight and policy.";	Modernizing inclusive Innovation in Food Systems, Investing in Regenerative Agriculture, Accelerating resilient supply chains and country pathways	has worked with 1000 organizartion in over 25 countries, over 100 value chains partnerships, 'benefitting millions of farmers in Asia, Africa, and Latin America'	No information found	no information found	WEF forum for increased action on food security	https://www.weforum.org/communities/shaping-the-future-of-food/	Not primarily nutrition, hence excluded	Chat GPT
9	Global Agriculture and Food Security Program (GAFSP)	GAFSP is a multilateral financing mechanism that supports country-led efforts to improve food security and nutrition in low-income countries. It brings together governments, donors, civil society, and the private sector to invest in agricultural development projects that enhance food security and promote sustainable livelihoods.	Financial Intermediary Fund (FIF), hosted within the World Bank Group	Chaired by a steering committee, individuals can be found here: https://www.gafspfund.org/civil-society-organizations	Australia, Canada, Bill & Melinda Gates Foundation, Germany, Ireland, Japan, Korea, The Netherlands, Norway, Spain, UK, USA	Supports private sector development through financial and technical resources, including grants, technical assistance, concessional loans, blended finance, and advisory services	"from farm to table"; all sizes engaged	All value chains	Provides over $493 million to support private sector development, focusing on demand-driven projects along the food chain, from farm to table​	Provides support that includes climate action interventions, improving access to climate-resilient seed varieties, efficient irrigation practices, and support for drought-resistant cropping practices​	2010	Established	Global, with specific projects in countries like Bangladesh, Kyrgyz Republic, Haiti, Somalia, Senegal, Côte d'Ivoire, Cambodia, and South Sudan	To improve food and nutrition security and build food system resilience by providing financing to countries, agribusinesses, and farmers, focusing on sustainable agricultural growth and food security	https://www.gafspfund.org/sites/default/files/2023-05/GAFSP%20Program%20Brief%202023_0.pdf	Governed collectively by a diverse group of stakeholders including donors, recipient countries, civil society organizations, and multilateral agencies, ensuring a broad-based and inclusive approach to decision-making and implementation​	Has annual open calls for funding proposals that are individually reviewed	Has mobilized more than US$2 billion in donor funds since 2010, reaching over 16.6 million people including 7 million women with its public sector support	Emphasizes the critical role of civil society organizations in ensuring that the voices, priorities, and interests of smallholder farmers are represented in decision-making processes, highlighting the importance of inclusive governance and diverse stakeholder engagement for successful outcomes		GAFSP has mobilized over $2 billion in donor funds and reached more than 16.6 million people,	https://www.gafspfund.org	Primary focus - provision of finance, hence excluded. Capacity building.	Google
10	Global Alliance for Climate-Smart Agriculture (GACSA)	GACSA is a multi-stakeholder partnership that promotes climate-smart agriculture practices to enhance food security, resilience, and sustainable development. It engages governments, farmers, private sector actors, research institutions, and civil society organizations to support the adoption of climate-smart agricultural approaches.	FAO	https://www.linkedin.com/in/hoogeveen-hans-7a196620/?originalSubdomain=it	FAO	All relevant private actors	medium-large; mostly comprised of universities, civil societies organizations, and industry consortiums/alliances	All	Functions aim at convening, connecting, and communicating among stakeholders to facilitate the development of bankable and sound projects	Not fully clear; seems to be knowledge sharing, research, and acts as a forum for communication/cooperation between member organizations; see publications here for more insight https://www.fao.org/gacsa/resources/csa-publications/en/	2014	Established	Global	To achieve sustainable agricultural development for food security under climate change	https://www.fao.org/3/a-au667e.pdf	Governing body overseeing full organization; strategic committee acts as a representative body of alliance members and holds voting authorities for approving annual prgrams and budgets; facilitation unit serves as the secretariat; three action groups - Knowledge, Investment, enablng environment - provide the services of the GACSA and address knowledge gaps required by members to undertake their a…	Follow FAO developed guidelines	See resources here: https://www.fao.org/gacsa/resources/gacsa-csa-documents/en/	See resources here: https://www.fao.org/gacsa/resources/gacsa-csa-documents/en/	See resources here: https://www.fao.org/gacsa/resources/gacsa-csa-documents/en/	nothing updated since COP 28	https://www.fao.org/gacsa/members/en/	Primary focus - Agriculture, hence excluded. Collaboration and convening.	Google
11	Global Food Security Cluster (GFSC)	GFSC is a coordination mechanism led by the United Nations World Food Programme (WFP) that brings together humanitarian actors to respond to food security emergencies and support resilience-building efforts. It engages with governments, NGOs, UN agencies, and the private sector to coordinate food assistance and strengthen food security interventions in crisis-affected countries.	FAO/WFP	Composed of 8 members who represent the following organisations: Concern Worldwide, Solidarités International (SI), Welthungerhilfe (WHH), Plan International, in addition to the Cluster lead agencies, FAO & WFP and the Cluster Coordinators	UN	Not specified	All sizes	All value chains	Provides guidance, technical and strategic support, and operational capacity, which indirectly supports the private sector engaged in food security and humanitarian responses	Coordinates resources, knowledge, logistics, and operations between 1200 partners across 34 operations in 30 member countries in response to humanitarian crises	2011	Established	30	Provide timely, coherent, and effective food security interventions through a network of partners, addressing issues of food availability, access, utilization, and stability​	https://fscluster.org/page/about-food-security-cluster	UN-overseen coordinating organization; solely focuses on coordinating diaster responses	Cluster Performance Monitoring and other tools to assess and guide its interventions	Please see their Global Response Dashboard for detailed impact metrics: https://fscluster.org/page/response-achievements-food-security				https://fscluster.org	Primary focus - Emergencies, hence excluded. Capacity Building, Convening/Coordination	Google
12	Global Nutrition Report (GNR)	Annual publication to measure, assess, and track the performance of global and national food systems in meeting nutrition goals. Target stakeholders are broadly defined as: • Country governments at any administrative level, such as ministry, municipality or any other national/regional/local authority or body that provides financial or non-financial aid to their own country to tackle poor diets an…	Independent	Co chairs: https://www.linkedin.com/in/shibanighosh/ ; https://www.linkedin.com/in/giacomo-zanello/?originalSubdomain=uk	Bill & Melinda Gates foundation; European Commission; Government of Canada; UK Aid; World Bank; German Federal Ministry fo Economic Development and Cooperation (BMZ)	• Private sector agri-food businesses, including in the food systems/production and agri-food industry. • Private sector non-food businesses, such as private healthcare facilities and health insurers.	All Olam food ingredients Olam Agri Group Nutriset (Severe malnutrition - Plumpy nut) Griffith Foods (Africa is not the market) Quorn foods IntegriCulture Inc. (Japan) Cargill Inc (SBN Business member) IKEA IFBA Compass Group (UK) Sainsbury's Super market Euglena Japan Kagome Company Japan Shidax (Japan) Danone Nagase Viita Japan PT Indo Food (Indonesia) Royal DSM (B2B) Unilever (SBN member) Mori…	All	Measurement/report which can be utilized to understand how countries throughout the world are meeting their nutrition goals	Provides annual reports alongside 'Nutition Accountability Framework' for civil actors, private companies, and legislators, to measure SMART nutrion goals.	2014	Established	Global; provides a nutrition report for all countries in the world	The GNR’s vision is a world free from malnutrition in all its forms. To inform, shape and inspire action with data and evidence on policy, practice and financing which result in greater accountability and progress in tackling poor diets and malnutrition globally. Goal 1: Stronger commitments: Stakeholders across sectors are enabled to develop ambitious, evidence-based and SMART nutrition commitme…	https://globalnutritionreport.org/documents/857/GNR_Charter_2030_Final_2023-04-17.pdf	Multistakeholder initiative comprised of global institutions; main oversight is through an Independent Expert Group, as well as a Stakeholder Group	see their Nutirion Accountability Framework here: https://globalnutritionreport.org/resources/naf/						Commitment and Monitoring	Google	5
13	New Vision for Agriculture (NVA)	The NVA is a multistakeholder initiative led by the World Economic Forum that aims to transform agricultural systems to achieve food security, environmental sustainability, and economic growth. It brings together governments, businesses, farmers, civil society, and other stakeholders to promote sustainable agriculture practices, improve productivity, and enhance food security.	WEF	Not an existing organization; rather, is an initiative with which organizations align themselves and their values with	Government of the Netherlands, USAID, Swiss Agency for Development and Cooperation	Encourages multi-stakeholder collaboration involving a wide range of private sector participants focused on agricultural value chains and market linkages for farmers	Large	All	Focused on aligning efforts and identifying opportunities to implement initiatives that promote dialogue, knowledge sharing, and concrete action at the country level. This includes working on the competitiveness of agri-food chains and linking farmers to markets	Knowledge sharing opportunity for all relevant actors (governments, private sector, advocacy groups); mobilies and directs investment directly to smallhold farmers, or directs investment to partner organizations	2009	Established	16 countries across Africa, Asia and Latin America	Aims to advance sustainable, inclusive agricultural growth and improve the livelihoods of smallholder farmers by leveraging public-private partnerships	https://www3.weforum.org/docs/WEF_CO_NVA_Overview.pdf	At the country level, action-oriented partnership initiatives engage the private sector in collaboration with governments, global organizations, farmers and other leading stakeholders to accelerate sustainable agricultural growth within specific regions or food value chains. The partnerships support countries in realizing their agriculture-sector goals by aligning investments, programmes and inno…	Specific monitoring and evaluation frameworks are not detailed, the initiative focuses on sustainable economic growth and environmental sustainability, which suggests these are key areas of measurement and assessment			Challenges often involve aligning diverse stakeholder interests and ensuring consistent funding and policy support.	lots of youtube videos from COP events.	None available	Focus on agriculture only - hence excluded	Preliminary Google search
14	Private Sector Mechanism/Private Sector Mechanism (PSM) to the United Nations Committee on World Food Security (CFS) ; (FAOPSM)	The FAO Private Sector Mechanism provides a platform for dialogue and collaboration between the FAO and the private sector on food security and nutrition issues. It engages businesses in policy discussions, partnerships, and initiatives to address hunger and malnutrition globally.	International Agri-Food Network	Micheal Keller, Secretary-General of the International Seed Federation https://www.linkedin.com/in/michael-keller-b81365138/?originalSubdomain=ch	Major supporters listed: Abott Labrators; Bayer; Cargill; Danone; Export Trading Group; Federalimentare; Gallup; Global Agribusiness Alliance; IAFN; International Council of Beverage Associations; International Dairy Federation Mead Johnson Nutrition; Nestle; Pick Foundation; Piscari Industries; Rabobank; Sight & Life (DSM); Syngenta Crop Protection; Tetra Laval; USCIB; Unilever; Yara Internation…	Engages with a diverse range of private sector entities across the agri-food value chain, from primary producers to large multinational corporations.	mechanism encompasses entities of various sizes; however, seems to be mostly made up of multinational corportations, national organizations, etc - Large	encompasses the entire agri-food value chain, indicating involvement in sectors such as crop production, livestock, forestry, fisheries, and food processing and distributio	Serves as a platform for dialogue and action, helping to connect the private sector with the United Nations’ efforts to secure global food security.	facilitates the engagement of the private sector in CFS activities, promoting collaboration, policy development, and knowledge exchange aimed at enhancing food security and sustainable agriculture; involved in CFS workstreams like nutrition, women’s empowerment, youth in agriculture, etc	IAFN, the coordinating body of PSM, was established in 1996.	Established	As a UN sub-organization, it operates globally	PSM’s mission aligns with that of the CFS, aiming to ensure food security and good nutrition for all, contributing to the achievement of the Sustainable Development Goals.	https://agrifood.net/wp-content/uploads/2022/05/Brochure-2019-PSM-1.pdf	Created by UN CFS; IAFN was elected to coordinate the PFS to operate as an open dialogue chanenl for all argucultural industry participants to engage with; board is compromised of private sector actors, Bill and Melinda Gates Foundation, civil society groups, research groups, and state members of the FAO	Contributes to and engages with the workstreams of the CFS, which includes various topics like nutrition, sustainable agricultural investment, and smallholder investment.	See annual reports: https://agrifood.net/psm/about/	See annual reports: https://agrifood.net/psm/about/	See annual reports: https://agrifood.net/psm/about/	PSM has been an active participant in the annual sessions of the CFS, bringing together representatives from the private sector to engage in dialogue and contribute to the policy-making process	https://agrifood.net/psm	Collaboration and Convening Capacity Building	Chat GPT	6
15	Sustainable Development Solutions Network (SDSN)	The UN Sustainable Development Solutions Network (SDSN) works under the auspices of the UN Secretary-General to mobilize the world’s universities, think tanks, and national laboratories for action on the Sustainable Development Goals (SDGs) and the Paris Agreement; empower societies through free online education; and translate scientific evidence and ideas into solutions and accountability. Estab…	None. Has it own organizational structure.	Cecil (Max) Haverkamp Director Sustainable Development Solutions Network https://www.linkedin.com/in/cecilmax/?originalSubdomain=de	No information found	Engagement with business is secondary. No information found on the type of private sector engaged.	Engagement with business is secondary. No information found on the size of private sector engaged.	Engagement with business is secondary. No information found on the food value chains that are focusssed by the private sector engaged.	Mobilizes scientific and technological expertise to promote practical solutions for sustainable development, which includes engaging the private sector in implementing the SDGs.	The support is primarily for members who are - Knowledge-generating institutions, including universities, research institutions, foundations, and civil society groups. Members have to be involved in research and/or education to participate in the global network; they cannot just engage in advocacy or communications activities. Member institutions should have deep expertise in one or more areas re…	2012	Established	Over 1700 members in 144 countries. Africa country members: Benin Cameroon Ethiopia Ghana Great lakes Ivory coast Kenya Nigeria Sahel South Africa Uganda	To mobilize global expertise, knowledge, and resources to promote practical solutions for sustainable development, including the implementation of the SDGs and the Paris Climate Agreement.	No information found	It operates under the auspices of the UN Secretary-General and is hosted by the Earth Institute at Columbia University in New York City. The SDSN's organizational structure includes regional and national networks around the world, which are coordinated by SDSN Regional and National Centers. These centers facilitate collaboration and action on sustainable development priorities at the local and re…	Publishes annual Sustainable Development Reports that track and rank the performance of all UN member states on the SDGs, providing the most up-to-date data to assess progress and areas needing attention. No M&E framework for the network found.	No information found.	No information found.	No information found.	The network does not primarily engage business.	https://www.unsdsn.org	No direct private sector engagement, hence excluded. SDSN primarily engages with academic institutions, research organizations, civil society groups, and government agencies. While, it also welcomes businesses as members, particularly those committed to advancing sustainable development goals, business engagement and influencing their practice is not the primary objective of SDSN. Business is not…	Chat GPT
16	Solidaridad Network (SOL)	Solidaridad works with businesses in the food sector across Africa to promote sustainable production practices, improve market access, and strengthen supply chain management through technical assistance and capacity-building programs.	Self lead	https://www.linkedin.com/in/andre-de-freitas/recent-activity/all/	See partners here: https://www.solidaridadnetwork.org/partnerships/	focusing on agricultural commodities like cocoa, coffee, cotton & textiles, fruit & vegetables, gold, leather, livestock & dairy, palm oil, soy, sugar, and tea	all sizes	active across multiple food value chains, including but not limited to cocoa, coffee, cotton & textiles, fruit & vegetables, and livestock & dairy	Technical assistance, polic advocacy, business ecosystem support, demand stimulation	provides technical support, aiming for safe and sustainable operational paths for farmers. This includes key performance indicators monitoring, technical support through their team, and ensuring projects meet the goals of landscape restoration, conservation of water resources, generation of value and income for families, and supporting local industries like the yerba mate industry in Brazil​	1969	Established	40	mission encompasses working through the whole supply chain to ensure sustainability is standard, enabling farmers and workers to earn a decent income, produce in harmony with nature, and shape their future​	https://drive.google.com/file/d/1NfFC59ge4IABkDPG52_pSI-GCuackvhc/view	Civil society organization that works with top-to-bottom with value chains in order to improve business outcomes and sustainability goals	https://drive.google.com/file/d/1NfFC59ge4IABkDPG52_pSI-GCuackvhc/view					https://www.solidaridadnetwork.org	Organization, hence excluded	Chat GPT
17	Standing Together for Nutrition (ST4N)	multidisciplinary group of experts from fields such as nutrition, economics, food systems, and public health. established in response to the COVID-19 pandemic to assess and mitigate its impacts on global nutrition. The initiative focuses on understanding and addressing how global crises — eg. pandemics, conflicts — affect nutritional outcomes and food systems, particularly harming vulnerable popu…	Self lead	See steering committee members here: https://www.standingtogetherfornutrition.org/team-2	Canadian Government	No specific sectors	All	All	Knowledge sharing, crisis readiness preparation	Offer resources for private sector to use; see here https://knowledgehub.standingtogetherfornutrition.org	2021	Emerging	Global	to mitigate the impact of global crises on nutrition, ensuring that vulnerable populations, especially women and children, maintain access to nutritious foods and essential health services.	https://static1.squarespace.com/static/5fc228ec616251320838493c/t/6399d2fe2b41d6066e18dd27/1671025407510/ST4N_Child+Wasting+in+Vulnerable+Communities+Brief.pdf	Little information available - most outward facing information is their steering committee (https://www.standingtogetherfornutrition.org/team-2)	No information found	See resources here: https://www.standingtogetherfornutrition.org/resources	See resources here: https://www.standingtogetherfornutrition.org/resources	See resources here: https://www.standingtogetherfornutrition.org/resources			No direct private sector engagement, hence excluded.	Chat GPT
18	SUN Business Network (SBN)	The SUN Business Network (SBN) is a global platform that brings together businesses, governments, and other stakeholders to address malnutrition, particularly in maternal and child nutrition. The network operates within the framework of the Scaling Up Nutrition (SUN) Movement, which is a global initiative launched in 2010 to unite governments, civil society, the United Nations, donors, businesses…	GAIN & WFP	https://www.linkedin.com/in/ritta-shine-8546aa49/?originalSubdomain=tz	The Ministry of Foreign Affairs for the Netherlands Irish Aid SUN Movement	SBN engages a wide range of businesses from multinational companies to SMEs across the agri-food value chain	All sizes	No specified chains; businessess of all varieites are invited to participate	Advocacy and Awareness on the role of private sector for advancing nutrition Capacity Building and Technical Assistance Partnerships and Collaboration Monitoring and Evaluation	regional activities support increased focus on cultivating and disseminating key learnings and best practices within and between countries.	2012	Established	Global	To reduce malnutrition in all its forms by fostering private sector engagement and action in nutrition, aligned with the SUN Movement's vision of a world free from malnutrition by 2030.	https://scalingupnutrition.org/wp-content/uploads/2020/07/SUN-Strategy3_draft_MAIN-DOCUMENT_ENG.pdf	At a global level, SBN acts as a mechanism for engaging multi-National Companies (MNCs) in nutrition and critically, for supporting national SBN networks to mobilize local businesses in line with national nutrition priorities and plans; Regionally, SBN Global Secretariat works through its team of strategically placed regional SBN focal points to strengthen strategic linkages and partnerships with…	ENABLING BUSINESS TO ADVANCE NUTRITION INDEX	No metrics provided; improve SME capabilites, gender priorities, and enhance national level nutrition investment				https://sunbusinessnetwork.org	Collaboration and Convening Commitment and Monitoring Capacity Building	Preliminary Google search	7
19	United Nations Food Systems Summit (UNFSS)	The UNFSS is a global initiative convened by the UN Secretary-General to mobilize action towards transforming food systems to achieve the Sustainable Development Goals (SDGs). It brings together governments, businesses, civil society organizations, and other stakeholders to identify solutions to the challenges facing food systems, including malnutrition and hunger	Supported by the UN Food Systems Coordination Hub and in collaboration with Rome-based UN Agencies such as FAO, IFAD, and WFP​	https://www.linkedin.com/in/agnes-kalibata-a38296122/?originalSubdomain=ke	United Nations	Engages a broad spectrum of stakeholders, including businesses, to discuss sustainable food systems, share best practices, and advocate for transformative actions	Large	All	Provides a platform for dialogue, sharing good practices, and fostering commitments to sustainable food systems transformation among all sectors, including private businesses.	Knowledge sharing opportunity for all relevant actors (governments, private sector, advocacy groups) to convene and discuss. No tangible value add to industry	2021	Established (one time summit)	Global	Comprehensive goal to launch bold new actions, solutions and strategies to deliver progress on all 17 Sustainable Development Goals	See all event documents here: https://www.un.org/en/food-systems-summit/documentation	One time foum UN-led forum	NA/one time forum	No information found	No information found		One time UN summit hosted in 2021	https://www.un.org/en/food-systems-summit	Conference - hence excluded.	Chat GPT
20	UN Global Compact (UNGC)	The UN Global Compact is a voluntary initiative that encourages businesses to adopt sustainable and socially responsible policies and practices (accountability mechanism), including those related to food security and nutrition. It engages companies in collective action and partnerships to advance the Sustainable Development Goals, including Goal 2: Zero Hunger. Benefits of joining: Unprecedented …	UN Sec. Gen.	Ms. Sanda Ojiambo sanda.ojiambo@unglobalcompact.org	United Nations	Engages a wide range of businesses from various sectors including multinational corporations and small and medium-sized enterprises	All sizes; see specific members here: https://unglobalcompact.org/what-is-gc/participants	All industries, not necessarily limited to food value chains	Provides resources and guides to support the Compact's mission, such as the SDG Compass, which helps companies align their efforts with the Sustainable Development Goals (SDGs)​	Comprehensive approach; see details here: https://unglobalcompact.org/what-is-gc/strategy	2000	Established	Global	Drive business awareness and action in support of achieving the SDGs and the UN’s broader development agenda, and to promote the 10 principles that cover various aspects of business ethics and sustainability	https://unglobalcompact.org/what-is-gc/strategy	Enabled by the UN, the compact works with companies to increase their alignment with the SDGs	Companies engaged with the UN Global Compact are encouraged to report on their progress and implementation of sustainable and socially responsible policies through various tools and resources provided by the initiative			Challenges in measuring progress and ensuring the SMARTness of commitments are noted. The need for more concerted and coordinated action is emphasized to overcome these challenges and enhance the effectiveness of global nutrition efforts​		https://unglobalcompact.org	Not primarily nutrition - hence excluded	Chat GPT
21	Zero Hunger Challenge (part of UNGC)	The Zero Hunger Challenge is a global initiative led by the United Nations Secretary-General to eradicate hunger, achieve food security, improve nutrition, and promote sustainable agriculture. It encourages partnerships between governments, businesses, civil society, and other stakeholders to address the root causes of hunger and malnutrition.(sub set of UN Global Compact). This is a global initi…	UNWFP	Mr. Ignace Beguin Billecocq, beguin@unglobalcompact.org	UN	All sectors are encouraged to participate, with a focus on agriculture, food production, distribution, and retail sectors to achieve sustainable practices and eliminate waste.	All	All	Encourages alignment of corporate policies with sustainable practices, support for small-scale producers, and innovation to reduce food loss and waste.	Companies that join are asked to: Align their corporate policies and strategies with the five elements of the Zero Hunger Challenge Take actions that will have a positive, demonstrable and quantifiable impact on at least one of the five elements Communicate publicaly on commitment, actions and outcomes.	2012	Emerging	Global	To eliminate hunger and ensure access to sufficient, safe, and nutritious food for all people year-round, to end all forms of malnutrition, and to build inclusive and sustainable food systems.	https://www.un.org/en/issues/food/taskforce/pdf/HLTF%20-%20ZHC%20Advisory%20Notes.pdf	Global initiative that invited companies to align their values accordingly; does not seem to have a strong presence in terms of actively producing changes, eg. Through research, knowledge charing, etc.	Progress is tracked against the Sustainable Development Goals; mainly Goal 2	Programmes in line with the Zero Hunger Challenge are taking shape or being discussed in around 25 countries around the world. Regional multi-stakeholder programmes, including the Hunger‐Free Initiative for West Africa, La Iniciativa América Latina y Caribe sin Hambre, and the Zero Hunger Challenge for Asia & the Pacific, bring global actors together to create operational programming.			Zero Hunger Challenge Website not working.	https://sdgs.un.org/partnerships/zero-hunger-challenge-zhc	Not primarily nutrition - hence excluded. Africa countries of focus - Angola, Bostwana, Central Africa, Congo, Egypt, Francophone West Africa, Ghana, Kenya, Mauritius, Morocco, Nigeria, Rwanda, South Africa, Tanzania, Tunisia	Chat GPT
22	Zero Hunger Private Sector Pledge	The Zero Hunger Private Sector Pledge is an initiative launched by the United Nations World Food Programme (WFP) to engage businesses and corporations in the global effort to achieve Zero Hunger by 2030, as outlined in Sustainable Development Goal 2. The pledge calls on companies to commit to taking action to address hunger, food insecurity, and malnutrition through their business operations, cor…	UNWFP	Cannot find information	The implementing organizations are a coalition of international organizations, namely: the Food and Agriculture Organization (FAO), the Global Alliance for Improved Nutrition (GAIN), Grow Africa, Grow Asia, the International Fund for Agricultural Development (IFAD), the International Institute for Sustainable Development (IISD), the Shamba Centre for Food & Climate, the World Benchmarking Allianc…	All entities	Companies of all sizes have pledged	initiative includes companies operating across multiple commodity supply chains.	Provides a framework for companies to align their investments with efforts to end hunger. This includes identifying ten high-impact intervention areas for investment and working with designated partners to achieve targeted outcomes​	initiative includes companies operating across multiple commodity supply chains. Examples of activities include enhancing environmental education, expanding business with smallholder farmers, repurposing agricultural by-products, and implementing sustainable agriculture and food security initiatives​	2021	Established	Companies have pledged in 48 countries, with a focus on priority regions of Africa, Asia, and Latin America	To mobilize private sector investments to end hunger, achieve food security, improve nutrition, and promote sustainable agriculture by 2030, in line with SDG 2​	No information directly maps to this section; however, see detailed information about the pledge requirements here: https://pledge.zerohungercoalition.org/en/how-pledge	Pledge is organized by several major multiateral organizations (detailed in Donor/funder section); binds pledging companies to a set of regulations (see terms of reference), that aligns with the goals of the pledge and the Zero Hunger Initiative more broadly	Tthe initiative aligns with the indicators and targets of SDG 2, eg. ending hunger, ensuring access to safe and nutritious food, ending all forms of malnutrition, and doubling the productivity and incomes of small-scale food producers	17 impact stories from opertaions of major companies in LICs can be found here: https://pledge.zerohungercoalition.org/en/stories		initiative highlights the crucial role of private sector investment in addressing hunger and the importance of collaboration across sectors	Over 50 companies have committed approximately USD 608 million towards the pledge,	https://pledge.zerohungercoalition.org/en	Collaboration and Convening Commitment and Monitoring	Authors	8
23	World Business Council for Sustainable Development (WBCSD)	WBCSD's Food and Agriculture Program engages businesses in efforts to promote sustainable agriculture, improve food security, and enhance nutrition outcomes. It focuses on issues such as food waste reduction, sustainable sourcing, and nutrition-sensitive supply chains.	Self lead	CEO: https://www.linkedin.com/in/peter-bakker-14a13638/?originalSubdomain=ch		Members come from all business sectors and include companies of various sizes, representing a combined revenue of over $8.5 trillion and 19 million employees.			Offers resources and guidance on sustainable business practices, conducts impactful projects, and fosters collaborative efforts among member companies to address sustainability challenges		1995		Global	To lead the business community in creating a sustainable future for business, society, and the environmen								https://www.wbcsd.org	Led by private sector, hence excluded	Google
24	Business for Social Responsibility (BSR)	BSR is a global nonprofit organization that works with businesses to promote sustainable development, including nutrition. It engages companies to integrate nutrition into their corporate social responsibility strategies, supply chain management, and product development processes.	BSR	https://www.linkedin.com/in/aron-cramer-b75773/		Works with businesses across multiple industries, including consumer products, healthcare, technology, and financial services, among others.			Offers sustainability advisory services to help companies achieve impact, create long-term business value, and develop resilient and sustainable strategies. They also facilitate collaborative initiatives and provide access to a Sustainable Futures Lab.		1992		Offices in Copenhagen, Guangzhou, Hong Kong, London, New York, Paris, San Francisco, Shanghai, Singapore, Tokyo, and Washington, D.C.	Focus on integrating sustainability into core business practices and collaborating on global sustainability challenges			Doesn’t outline a specific M&E framework, but they offer a wide range of sustainability insights, advisory services, and collaboration opportunities						Led by private sector, hence excluded	Chat GPT
AFRICA INITIATIVES
25	African Fertilizer and Agribusiness Partnership (AFAP)	AFAP is a consortium that works to increase agricultural productivity and promote food security in Africa by partnering with the private sector to improve access to fertilizers, seeds, and other inputs for smallholder farmers.	" AFAP is the lead organization. AFAP is a private sector-led initiative focused on promoting sustainable agricultural development and agribusiness growth in Africa. As the lead organization, AFAP plays a central role in driving initiatives, coordinating partnerships, and implementing programs aimed at increasing agricultural productivity."	" Dr. Nteranya Sanginga (Chairman of the Board of Trustees) https://www.linkedin.com/in/nteranya-sanginga-992707bb/?originalSubdomain=ng"	Receives funding from various international donors, including the African Development Bank and development agencies from the USA and other countries.	"Agribusiness Companies Financial Institutions Input Suppliers Farmers' Organizations Technology Providers Trade and Market Development"	Engages with small to very large enterprises within the agricultural sector.	Focuses on the fertilizer sector but impacts broader agricultural value chains including crops like fruits and vegetables through improved nutrient management.	"– Agribusiness Services – Market Development Services – Financial Services – Policy Services – Market Intelligence Services "	Includes technical assistance, financial support for developing fertilizer markets, and training programs aimed at enhancing the use of fertilizers and other agricultural inputs.	2012	Established	41 African countries mainly in the South-East	We are a social enterprise that aims to increase access to fertilizer and other inputs for farmers in Africa, particularly smallholder farmers.	https://afap-partnership.org/about-us/vision-mission/	Works as a partnership network involving various stakeholders including governments, private sector companies, and international organizations.	- Plan for periodic evaluations to assess the effectiveness, efficiency, and impact of AFAP's interventions. This may include mid-term and end-term evaluations, as well as special studies or evaluations focused on specific aspects of the program. - Build the capacity of AFAP staff and partners in M&E concepts, tools, and techniques to ensure effective implementation of the framework. Provide trai…	Has significantly contributed to improving access to and use of fertilizers in targeted countries, leading to increased agricultural productivity.	Emphasizes the importance of integrating supply chain solutions with training and market development to ensure sustainable improvements in agricultural productivity.	Supported by strong partnerships and international funding; challenges include navigating diverse regulatory environments and ensuring the sustainability of supply chains.	AFAP, has successfully completed 11 projects across 40 African countries in 2022 with a total worth of $10,700,000	https://www.aecfafrica.org/approach/how-we-deliver/	Focus on increasing food production only, no nutrition specific focus - hence excluded	Chat GPT
26	Africa Enterprise Challenge Fund (AECF)	AECF is a consortium that provides grants and financing to businesses in Africa, including those in the agriculture and food sectors. It supports initiatives that contribute to food security, promote sustainable agriculture, and improve nutrition.	Afreximbank Afreximbank Fund for Export Development in Africa	Frank N. J. Braeken - Board Chair (https://www.linkedin.com/in/frank-braeken-704a805/)	Funded by multiple international donors including the UK's Foreign, Commonwealth & Development Office (FCDO), Swedish International Development Cooperation Agency (SIDA), and others.	Variety of private sectors such as healthcare, technology	From micro to very large enterprises, focusing on innovative and scalable business models.	Supports businesses within various agricultural value chains including crops like fruits and vegetables, providing solutions that enhance productivity, market access, and sustainability.	Access to capital Risk mitigation Market access Access to information/resources	Includes financial support, training in new agricultural techniques, access to new technologies, and market information to help businesses scale and access new markets.	2008	Established	"- Mali - Senegal - Liberia - Sierra Leone - Ivory Coast - Ghana - Burkina Faso - Nigeria - Cameroon - D.R. Congo - South Sudan - Ethiopia - Somalia - Tanzania"	"Vision: To build a prosperous, enterprising, and resilient Africa Mission: To catalyse, grow and improve the resilience of private sector enterprises for the benefit of rural and marginalised communities in Africa."	https://www.aecfafrica.org/fr/careers/request-for-proposals-terms-of-reference-tor-for-consultancy-to-provide-technical-assistance-to-funded-seed-enterprise-under-the-seed-for-impact-programme-sip-2-0-in-tanzania-february-2024/#:~:text=The%20AECF%20reserves%20the%20right,time%2C%20without%20prior%20notice%20and	Operates as a challenge fund, providing competitive grants and loans to the most innovative and effective proposals.	- Data collection - Baseline assessment - Evaluation Methods - Learning and Adaptation"	Has impacted millions of lives by creating jobs, enhancing income, and improving livelihoods through sustainable development initiatives.	Emphasizes the importance of flexibility in funding and support to adapt to diverse business needs and local conditions.	Progress is supported by strong partnerships and innovative funding models but hindered by challenges like market volatility and regulatory environments in different countries.	- Raised US 392 million to date - Providing funding to 26 countries in Africa - In 2021, they launched a new strategy with the objective to build resilience and sustainable incomes for rural and marginalised communities in Africa. - In 2025, they successfully implement our 2021 to 2025 strategic plan impacting 10 million rural and marginalized people, catalysing 500 businesses and surfacing 5 inn…	https://www.aecfafrica.org/	AECF (Africa Enterprise Challenge Fund) is a leading non-profit development organization and not really an initiative, hence excluded.	Google
27	Africa Food Safety Network (AFoSaN)	AFoSaN is a regional network that brings together African countries, regional economic communities, and other stakeholders to strengthen food safety systems and improve public health outcomes. It engages both the public and private sectors to address food safety challenges and promote nutrition.	This network is a consortium involving various government agencies, non-profit organizations, and private sector partners, although specific leading organizations are not distinctly mentioned in the available resources.	Specific contact details are not provided in the available sources.	Funded by a combination of governmental, international donors, and private sector contributions.	Stakeholders such as testing laboratories, food safety inspectors, and other relevant entities	Engages with enterprises of all sizes, from micro-enterprises to large corporations within the food industry.	Works across various food value chains including fruits, vegetables, meat, and dairy, focusing on improving safety and compliance standards throughout.	Supports its members through sharing of information on food safety matters, analytical techniques, career development, risk analysis, standard setting, consumer safety, and trade in foodstuff	Includes training on best practices in food safety, provision of technical assistance for safety standard certification, and workshops on new regulations and technologies.	N/A	described as a well-established initiative given its wide reach and involvement of major stakeholders.	various African countries, specific countries aren't listed in the provided details.	To promote networking among food safety institutions, laboratories and related stakeholders to strengthen food safety control systems in Africa	Aims to harmonize food safety standards across Africa and increase compliance to protect consumers and ensure fair practices in the food trade.	Involves a networked approach with multiple stakeholders including government bodies, international agencies, and private sector participants working collaboratively.	None found	Not specified, but likely includes improved food safety standards, reduced foodborne illnesses, and increased consumer trust in local food markets.	The importance of multi-stakeholder collaboration and continuous education on food safety are likely key lessons, based on the nature of the initiative.	Supported by international expertise and funding, but potentially hindered by varied regulatory environments and the complexity of coordinating across multiple countries.		https://www.africanfoodsafetynetwork.org/#:~:text=About%20AFoSaN&text=This%20is%20a%20network%20of,testing%20laboratories%20as%20a%20foundation.	Focus only on one specific area - food safety, with no nutrition-specific objective, hence excluded.	Chat GPT
28	Alliance for a Green Revolution in Africa (AGRA)	AGRA is a partnership between the African Union and the Rockefeller Foundation that aims to catalyze agricultural transformation in Africa. It works with governments, farmers, civil society, and the private sector to increase agricultural productivity, improve market access, and enhance food security on the continent.	African Union and Rockefeller Foundation	https://www.linkedin.com/in/agnes-kalibata-a38296122/?originalSubdomain=ke	Governments of Burkina Faso, Ghana, Ethiopia, Kenya, Malawi, Mali, Mozambique, Rwanda, Nigera, Tanzania, Uganda,	Works closely with various stakeholders, including public and private sector players, to develop and implement strategies for improved food security and income through sustainable farming practices	Large	Operates across all agricultural value chains	Works with NGOs, governments, private sector actors, civil society groups, etc… to create and implement proven agricultural solutions and interventions for smallholder African farmers	Interventions include developing seed and fertilizer systems, building resilience in farming practices, promoting inclusive markets and trade, and enhancing policies and state capabilities for agricultural transformation	2006	Established	Prioritized operations in 11 countries across different agro-ecological zones, including the Guinea Savannah and East African Highlands	Overarching goal is to double the yields and incomes of smallholder households in its focus countries, aiming to significantly increase food security and transform agriculture into a sustainable and profitable business for farmers.	https://agra.org/wp-content/uploads/2023/08/AGRAs-Five-Year-Strategy_Sustainably-Growing-Africas-Food-Systems.pdf	Approach is characterized by working with large organizations in order to gain knowledge and create standardized agriculture solutions for smallhold farmers; then, provides farmers with the tools and expertise to impliment said solutions	Includes the use of various monitoring and evaluation tools, as outlined in its publications, which include the Africa Agriculture Status Report and Food Security Monitor. These tools provide detailed assessments of the impact of AGRA's programs and the progress toward its targets	Please see annual report here: https://agra.org/wp-content/uploads/2023/11/AASR-2023.pdf	Please see annual report here: https://agra.org/wp-content/uploads/2023/11/AASR-2023.pdf	Please see annual report here: https://agra.org/wp-content/uploads/2023/11/AASR-2023.pdf	Also places emphasis on climate change adaptation, inclusivity, and improving nutrition.	https://agra.org	AGRA’s mission is to transform the lives of smallholder farmers from a solitary struggle for survival to a business that thrives. It does not focus on nutrition-specific activities for consumers buying foods in retail markets. Hence excluded.	Google
29	Food Fortification Alliances of West Africa The National Alliances for Food Fortification (ANF-BF) The National Alliance for Food Fortification (NAFF) of The Gambia Ghana Guinea Liberia Mali	Collaborations between government bodies, international organizations, and private sector entities aimed at enhancing food security in West Africa by fortifying staple foods with essential vitamins and minerals to combat malnutrition.	led by local government health departments in partnership with international donors and private sector stakeholders.	N/A	funded by international development agencies such as USAID, the World Health Organization, or local government funds.	local and multinational food production companies, particularly those involved in the milling of grains and production of staple foods like flour and oil.	Engages a range from small to very large enterprises, depending on the scale of operations and the products being fortified.	Typically involved in staple food products such as maize, wheat, oil, and sugar.	Collaboration opportunities Coordination and Oversight Mobilise funding Technical assistance - Capacity building and training, guidance on fortification standards, QC/QA, marketing support, access to information and research Favourable regulatory environment	May include provision of fortification machinery, training in fortification techniques, and funding for initial setup costs.	N/A	Established	West Africa	To reduce micronutrient deficiencies and improve public health outcomes through the fortification of staple foods.	N/A	Collaborative efforts involving multiple stakeholders with a centralized coordination mechanism.	monitoring the levels of fortification in foods, assessing compliance with standards, and evaluating the health impacts of the fortification.	includes reductions in micronutrient deficiencies among the population.	Importance of stakeholder engagement and the need for continuous monitoring and adaptation of strategies.	Supported by strong governmental and international cooperation, but hindered by challenges such as funding limitations and logistical complexities.		www.fao.org/3/cb8628en/cb8628en.pdf	The objective of this research was to identify how civil society and development agencies are able to influence private sector action for improving nutrition. Since food fortification is mandated by many governments in Africa, this was excluded.	Chat GPT
30	Grameen Foundation's Village Phone Program	This initiative involves a consortium of partners, including private sector companies, to provide mobile phone-based services to rural communities in Africa. These services may include agricultural information, market prices, and nutrition education, contributing to food security and nutrition outcomes	Grameen Foundation USA	https://www.linkedin.com/in/zubaida-bai/	Funded by various donors including large corporations and international development organizations.	Microfinance institutions, telecommunications providers	Mainly micro to small enterprises, focusing on individual entrepreneurs and small business setups.	focused on telecommunications, the increased connectivity can indirectly support agricultural sectors by providing better access to market information, weather forecasts, and mobile banking.	Empowers the poor, especially women, to create mobile phone-based businesses; offers microenterprise opportunities and community access to telecommunications.	Includes business training, microfinancing for start-up costs, and ongoing technical support to ensure sustainability.	2002	Established, with adaptations and implementations in various countries.	22 countries, most notable in in Ughanda, Ghana, Bangladesh, and Indonesia	Spread the Village Phone model throughout the developing world, providing affordable, accessible telecommunications services to the rural poor and thereby promoting economic development	https://grameenfoundation.org/partners/programs/current-programs	Operates through partnerships with local businesses, international telecom companies, and community members.	Focuses on measuring the economic impact on beneficiaries, particularly looking at income levels, business sustainability, and community benefits.	Significant increases in income for entrepreneurs, improved community access to communication services, and enhanced economic activities in rural areas.	The importance of local involvement, sustainable business models, and the necessity of ongoing support and training to ensure the success of the entrepreneurs.	Supported by the expansion of mobile networks and technology; hindered by infrastructure challenges in rural areas and initial costs for setup.	The Village Phone Program not only revolutionized access to telecommunications in remote areas but also demonstrated a sustainable model of micro-entrepreneurship that has been replicated in various regions worldwide, enhancing digital inclusion and financial empowerment.	https://www.grameenphone.com/personal/services/vas/village-phone#:~:text=Village%20Phone%20Program%20is%20a,to%20make%20their%20opinions%20count.	Focus on farmer empowerment, no nutrition specific, objective for consumers in markets, hence excluded	Chat GPT
31	Partnership for Nutrition in Tanzania (PANITA)	PANITA is a coalition of public and private sector organizations in Tanzania working to address malnutrition. It engages businesses in efforts to promote nutrition-sensitive agriculture, improve access to nutritious foods, and raise awareness about the importance of healthy diets.	Scaling Up Nutrition	No specific contact found - general inquiry email is sun.csnetwork@savethechildren.org.uk	Supported by various international donors, including USAID and other global health organizations.	Works with various sectors including agriculture, education, health, early childhood development (ECD), community development, gender, WASH, livestock, and fisheries.	Includes a range of business sizes from micro to large enterprises involved in food production and supply chains.	Active across various food value chains, particularly focusing on enhancing nutritional content in staple foods like fruits, vegetables, and grains.	Engages in advocacy for increasing the prioritization of nutrition in government plans & budgets, policy improvement, building the capacity of CSOs, and implementing nutrition projects with members.	Includes training sessions on food safety, nutrition education programs, and support for the implementation of fortification in food production processes.	Cannot find information	established initiative given the structured involvement of international donors and agencies.	Tanzania	To improve the nutritional status of Tanzanian citizens by enhancing food quality and accessibility and increasing awareness of nutritional practices.	Includes guidelines on operational practices and goals aimed at reducing malnutrition and enhancing public health through better nutrition	Comprises a network of partnerships leveraging expertise from various sectors including government, private sector, and non-profit organizations to collaboratively address nutritional challenges.	N/A	includes improved nutritional outcomes, increased availability of fortified foods, and heightened public awareness of nutrition issues.	importance of multi-sectoral cooperation and the effective implementation of educational programs to enhance public nutritional knowledge.	Supported by strong international cooperation and funding; challenges may include logistical complexities in distributing nutritional supplements and fortified foods across diverse regions.	This partnership exemplifies the impact of collaborative efforts in addressing public health issues, showcasing how international support and local expertise can come together to enhance the wellbeing of a nation.	https://www.suncivilsociety.com/alliances/partnership-for-nutrition-in-tanzania/	Civil Society Alliance, Not an initiative. hence excluded.	Chat GPT
32	Partnership for Sustainable Agriculture in Ghana (PSAG)	PSAG is a public-private partnership that brings together government agencies, businesses, farmers' organizations, and civil society to promote sustainable agriculture practices and improve food security in Ghana. It focuses on increasing agricultural productivity, enhancing market access for smallholder farmers, and supporting rural development initiatives.	Cannnot find any information for an organization under this name - is this it? https://www.giz.de/en/worldwide/136790.html	N/A	Funded by international development agencies, local government support, and private sector contributions.	Engages agricultural businesses, agrochemical companies, and technology providers.	Involves a range of business sizes from smallholder farmers to large agribusinesses.	Operates across multiple food value chains, including cereals, fruits, vegetables, and legumes, focusing on enhancing productivity and sustainability.	Offers technical assistance, access to improved agricultural inputs, training in sustainable farming practices, and financial support.	Includes the dissemination of improved seed varieties, training in integrated pest management, support for soil health programs, and implementation of water-efficient technologies.	N/A	Established	Ghana	Aims to transform agriculture in Ghana by promoting sustainable practices that enhance yield and reduce environmental impact.	includes frameworks for collaboration among partners and guidelines for implementation of sustainable practices (but not specific)	Comprises multiple stakeholders including government agencies, NGOs, and private sector participants working under a unified framework to promote sustainable agriculture.	monitoring of agricultural productivity, environmental impact assessments, and evaluations of socio-economic benefits to farmers.	Expected to include increased agricultural yields, improved soil health, and enhanced sustainability of farming practices.	The importance of stakeholder engagement and the need for continuous adaptation of technologies and methods to local conditions.	Supported by strong partnerships and funding, but potentially hindered by challenges in scaling up technologies and adapting practices to diverse agricultural contexts.	This partnership reflects a significant step towards achieving Ghana's broader goals of economic development and poverty reduction through enhanced agricultural practices and sustainability.	https://w05.international.gc.ca/projectbrowser-banqueprojets/project-projet/details/d000081001	Focus on sustainable agricultural practices with no nutrition-specific objective for consumers in markets - hence excluded	Chat GPT
33	African Union's Continental Nutrition Accountability Scorecard (CONAS)	CONAS is an accountability mechanism developed by the African Union to track progress on nutrition-related commitments and actions at the continental level. It encourages governments, businesses, and civil society organizations to prioritize nutrition interventions and hold stakeholders accountable for achieving nutrition targets.	African Leaders for Nutrition	No contact info can be found; direct inquiries to AU through this website https://au.int/en/contact	Hosted by the African Development Bank and the Health, Humanisatian Affairs Branch of the African Union	Engages a variety of stakeholders including international organizations, governments, and developmental partners	Very large - seems to be a tool directed for use by national governments, not private sector focused	All value chains that are connected to healthy, nutrious diets	Provides detailed data and analysis on nutrition indicators which inform and shape policies, and recommendations are provided to help African leaders accelerate progress on nutrition goals	Serves as a point of reference for national governments to understand what areas of nutrioin Africa needs to focus on; eg, some indicators are "% of children under 5 with anaemia", and "access to clean drinking water (% population)"	2019	Emerging; status unclear since intial report in 2019	African Union states	Mission is to end malnutrition and promote nutrition across Africa. It is intended to serve as a foundation to support African leaders in implementing strategic policies and investing in nutrition programs to address malnutrition	Please download the official briefing & recommendation report here: https://au.int/en/documents/20220331/continental-nutrition-accountability-scorecard	Convened by the ADB and AU in order to provide a snapshot of nutrioin in Africa and further produce key recommendations for national governments to focus on.	The scorecard includes 20 indicators categorized into Nutrition Status, Service Coverage, Enabling Environment, and Socio-economic Impact, offering a comprehensive picture of nutrition goals in Africa	None indicated since scorecard's release in 2019	Please download the official briefing & recommendation report here: https://au.int/en/documents/20220331/continental-nutrition-accountability-scorecard ; a few key areas are concern are: exclusive breastfeeding rates among infants 0-6 months of age, and % of children under 5 with anaemia	There are significant gaps in the availability of timely and good quality nutrion data at the country level, impeding measurements, learning, and accountability efforts	Does not seem to be private sector facing; is a tool for national governments	https://au.int/en/documents/20220331/continental-nutrition-accountability-scorecard	No direct private sector engagement, hence excluded	Chat GPT
34	Zero Hunger Challenge in Africa	The Zero Hunger Challenge is a global initiative launched by the United Nations to end hunger, achieve food security, improve nutrition, and promote sustainable agriculture. In Africa, the challenge involves multistakeholder efforts to address the underlying causes of hunger and malnutrition, including poverty, climate change, and conflict.	PART OF GLOBAL 'ZERO HUNGER CHALLENGE'	https://www.linkedin.com/company/opportunities-for-african-students?originalSubdomain=ke	Funded by various international donors, including major development agencies and participating governments.	Engages with agribusinesses, food production companies, and technology providers within the agricultural sector.	Involves businesses of all sizes, from micro-enterprises to large multinational corporations within the food and agriculture industry.	The initiative impacts multiple food value chains, focusing on enhancing productivity, sustainability, and nutritional outcomes across staples like cereals, fruits, and vegetables.	Offers technical assistance, financial support, and innovation in sustainable agricultural practices, including the promotion of climate-smart agriculture.	Includes capacity building, access to new technologies and innovations, improvements in supply chain management, and facilitation of access to markets.	2012	Established, with ongoing projects and initiatives under its umbrella.	Operates across various countries in Africa, aiming to address region-specific challenges related to hunger and food security.	To end hunger, achieve food security and improved nutrition, and promote sustainable agriculture in Africa by 2030.	https://www.fao.org/3/i3434e/i3434e.pdf	Collaborative network involving multiple stakeholders, including international organizations, national governments, the private sector, and community groups.	Employs comprehensive monitoring and evaluation practices to assess the effectiveness of interventions and progress towards meeting its goals.	Has contributed to significant improvements in food security and nutritional outcomes in targeted regions, though challenges remain.	Highlights the importance of integrated approaches that combine local and international resources and knowledge to tackle complex issues such as hunger and malnutrition.	Progress is supported by strong international backing and partnerships, but hindered by challenges such as climate change, political instability, and economic constraints.	The initiative not only focuses on immediate food relief but also strives to build sustainable food systems that can withstand economic pressures and climate challenges, aiming for long-term solutions to hunger in Africa.	https://www.un.org/en/zerohunger/	No direct private sector engagement, hence excluded	Chat GPT
35	Africa Food Security Leadership Dialogue (AFSLD)	AFSLD is a platform that brings together leaders from government, the private sector, civil society, and academia to discuss and develop strategies for addressing food security challenges in Africa. It fosters collaboration and innovation to improve nutrition outcomes on the continent.	Organized by the Republic of Rwanda, African Union Commission, World Bank Group, FAO, African Development Bank and IFAD, the African Food Security Leadership Dialogue	None found	organized by core partners that included the African Union Commission (AUC), the World Bank, Food and Agriculture Organization (FAO), the International Fund for Agricultural Development (IFAD), and African Development Bank Group (AfDB)	Emphasizes partnerships across sectors, including governmental, intergovernmental, and private sectors, to foster food security and agricultural adaptation to climate change	Large - major private sector actors, mutinational Ngos, and state governments	meant for all value chains that are connected to healthy, nutrious diets	Aims to scale-up collaboration through joint planning and programming, co-financing, parallel financing, and joint analytical and advisory activities to address food security in the context of climate change	Opportunity for dialogue & connecting high level leaders	First held in 2019	Emerging; un clear if another event has been held since 2019	Targets food security challenges across Africa	Seeks to strengthen support for food security programs in Africa, helping agriculture adapt to climate change, and ensuring collaborative efforts towards achieving the Comprehensive Africa Agriculture Development Programme (CAADP) zero hunger target by 2025.	None found	Dialogue/conference held in 2019	Encourages joint portfolio reviews to assess progress on agreed technical, institutional, and policy actions aimed at adapting Africa’s agriculture to climate change and enhancing food security	None found	None found	Does not seem to have become a reocurring event; lack of interest/funding?	Seems to have been a one-time event; no indication of being held since	https://www.cgiar.org/news-events/event/africa-food-security-leadership-dialogue/	No direct private sector engagement, hence excluded	Chat GPT
36	Africa Nutrition Security Partnership (ANSP)	To help fight the widespread and growing problem of malnutrition, the EU and UNICEF have launched Africa’s Nutrition Security Partnership (ANSP) to improve nutrition security among women and young children on the continent. The ANSP initiative is supporting four African countries directly – Burkina Faso, Ethiopia, Mali and Uganda – under a four-year programme (2011-2015). These countries bear a h…	The European Union (EU) and the United Nations Children’s Fund (UNICEF)	No info found	The European Union has provided a €20 million grant as a vital contribution to a wider multi-donor initiative	Emphasizes partnerships across sectors, including governmental, intergovernmental.	Not applicable.	Nutrition-specific interventions include promotion of use of available foods and resources, breastfeeding promotion, vitamin and mineral supplements, appropriate complementary foods, fortification of staple foods and integrated management of acute malnutrition			N/A	established initiative given the ongoing nature of nutrition and food security challenges.	Operates in various countries across Africa, aiming to address regional and country-specific nutritional needs.	eradicate malnutrition and enhance food security in Africa through sustainable, integrated programs that link agriculture, nutrition, and health.	Not available	network of partners working under a collaborative framework, with coordination provided by lead organizations.	Not specified	reduced rates of malnutrition, improved access to nutritious foods, and increased awareness of nutritional best practices among communities.	importance of cross-sector collaboration and the integration of local community needs into program design for effective outcomes.	Supported by international funding and partnerships but may face challenges such as political instability, logistical issues, and the need for sustained financial support.	This initiative is part of broader efforts to achieve the Sustainable Development Goals related to ending hunger and improving nutrition, showcasing a model of multi-sectoral collaboration essential for tackling complex global challenges like malnutrition.	https://scalingupnutrition.org/sites/default/files/2021-12/EU-UNICEF-ANSP-Brochure1.pdf	No direct private sector engagement, hence excluded	Chat GPT
37	African Nutrition Society (ANS)	The ANS is a professional association that brings together nutrition scientists, researchers, policymakers, practitioners, and industry stakeholders from across Africa. It provides a platform for collaboration, capacity building, and knowledge exchange to advance nutrition research, policy, and practice on the continent.	Africa Nutrition Society	https://www.linkedin.com/in/namukolo-covic-070841189/?originalSubdomain=et	Funded by membership fees, grants from various international health organizations, and partnerships with educational and research institutions.	Engages with a wide range of professionals in the nutrition, food science, and health sectors to address nutrition challenges on the continent	Partners range from small to large entities, depending on the project and sector involved.	While primarily focused on nutrition and health, ANS indirectly impacts food value chains through its research and advocacy on nutritional practices that influence agricultural and food production sectors.	The society organizes conferences, workshops, and publishes newsletters and research findings to promote nutrition-sensitive agriculture and scale up nutrition across Africa​	Includes conferences, workshops, publications, and professional networking opportunities aimed at enhancing knowledge and practices related to nutrition.	2008	Established	Africa wide	Aims to develop and promote the nutrition profession in Africa, contributing significantly to the nutrition and health sectors by providing a platform for scientific dialogue, promoting training, research, and capacity building in nutrition	The society works under guidelines that promote scientific research and public health advocacy centered on nutrition. More detailed terms can typically be found in their governance and operational documents.	Governed by a board of directors and an executive committee, with various sub-committees focusing on specific operational areas like research, publications, and public engagement.	Involved in various activities including the organization of the Africa Nutrition Conference, aiming to advance knowledge, research, and policy development in nutrition	Includes improved knowledge and practices among health professionals, advancements in nutritional research, and better-informed policies and practices across Africa.	Highlights the importance of cross-sectoral and interdisciplinary approaches in addressing complex health and nutrition challenges.	Progress is supported by strong academic and professional networks and international collaborations. Challenges include funding limitations and the need for broader policy impact.		https://www.ansnet.org/en/	No direct private sector engagement, hence excluded	Chat GPT
38	CAADP Non-State Actors Coalition (CNC)	The CNC is a coalition of non-state actors, including farmers' organizations, civil society groups, research institutions, and the private sector, that engages in CAADP processes to promote inclusive agricultural development and food security in Africa.	The coalition is made up of various non-state actors including civil society organizations, farmer groups, private sector entities, and academic institutions.	Mr. Kop’ep Dabugat, kopdabs@hotmail.com	Supported by international development partners including USAID and other entities interested in agricultural development in Africa.	Farmers’ groups, civil society organizations, relevant private sector actors	Ranges from small and medium enterprises to large corporations involved in different facets of the agricultural value chain.	Engaged in various agricultural value chains, including but not limited to cereals, fruits, vegetables, and livestock.	Policy advocacy	Offers technical assistance, advocacy for better policy environments, and networking opportunities that connect business leaders with policymakers and development partners.	2015	The coalition operates as an established entity given its structured involvement in ongoing CAADP processes.	Africa wide	To unite relevant farmers’ groups, civil society organizations, and private sector actors towards enhanced agricultural productivity in Africa.	advocating for and supporting the implementation of CAADP's agricultural development goals.	Non-state actors organized in a coalition to work collaboratively with governments and international partners.	None	Contributes to more inclusive agricultural policy environments and enhanced engagement of private sector and civil society in policy dialogues.	Highlights the importance of inclusivity and the active engagement of all agricultural stakeholders in policy processes to ensure sustainable development.	Progress is supported by strong partnerships and international backing. Challenges include aligning diverse interests of multiple stakeholders and ensuring consistent funding.	Very little available information	NA/ website does not work	Focus on agricultural development. No nutrition-specific focus, hence excluded.	Chat GPT
39	Comprehensive Africa Agriculture Development Programme (CAADP)	CAADP is an African Union-led initiative that aims to boost agricultural productivity and food security in Africa. It brings together governments, regional economic communities, development partners, civil society, and the private sector to develop and implement national agricultural investment plans.	NEPAD	No info found; website hmoe page has query submission form	Funded by African Union member states and various international donors including global development agencies.	Engages with a broad spectrum of stakeholders, including the private sector, to drive agricultural transformation and economic development across the continent.	Ranges from micro-enterprises to large corporations involved in various aspects of the agricultural value chain.	Involved in multiple food value chains including grains, vegetables, fruits, and livestock.	Aims to increase public investment in agriculture to at least 10% of national budgets and to raise agricultural productivity by at least 6%	Includes technical assistance, access to finance, market access initiatives, and capacity building in modern agricultural techniques.	2003	Established, with ongoing initiatives and periodic reviews to ensure progress.	Africa-wide	Aims to help African countries eliminate hunger and reduce poverty by raising economic growth through agriculture-led development	\chrome-extension://efaidnbmnnnibpcajpcglclefindmkaj/https://au.int/sites/default/files/bids/38129-tor_-caadp.pdf – details on specific goals, operations, and governance.	Structured as a continental framework under the AU and NEPAD, involving member states and various stakeholders in the implementation of national agriculture plans.	Progress is monitored through a Biennial Review Reporting mechanism	Significant impact on increasing investment in agriculture, improving agricultural productivity, and enhancing food security in participating countries.	Highlights the importance of commitment and alignment at the national and continental levels to achieve sustainable agricultural growth.	Supported by commitment from member states and international funding, but hindered by challenges like inconsistent implementation and funding disparities.	CAADP was one of the first comprehensive agricultural development programs on the continent, setting a precedent for a 10% national budget allocation to agriculture	https://caadp.org	Focus on agricultural development. No nutrition-specific focus, hence excluded.	Google
40	New Partnership for Africa's Development (NEPAD)	NEPAD is a development program of the African Union that promotes regional integration, infrastructure development, and socioeconomic transformation in Africa. It includes initiatives to enhance food security, agricultural productivity, and rural development through multistakeholder collaboration.	African Union Development Agency	https://www.linkedin.com/in/nardos-bekele-thomas-9a778025/?originalSubdomain=za	Funded by African Union member states, international partners including various global development agencies, and private sector contributions.	Engages with various sectors, including agriculture, climate change management, infrastructure, human development, governance, and cross-cutting issues such as ICT and gender	Engages all sizes from micro to very large enterprises across different sectors.	Involves sectors like agriculture where it addresses issues from production (seeds, fertilizers) to market (storage, logistics).	Facilitates and coordinates continent-wide programs, mobilizes resources, and works with global partners, RECs, and member states for implementation.	Includes development of infrastructure, support for agricultural projects, enhancement of technological and scientific research capacities, and initiatives aimed at improving governance and financial management.	2002	Established, with ongoing projects and initiatives under its framework.	Across Africa	Aims to eradicate poverty, promote sustainable growth and development, integrate Africa into the global economy, and empower women.	https://www.nepad.org/interactive-timeline/nepad-planning-and-coordinating-agency	Functions as a pan-African initiative, coordinated by the African Union with various stakeholders including member states and private sector partners.	Focus on six themes for monitoring and evaluation, including agriculture and food security, climate change and natural resource management, regional integration and infrastructure, human development, economic and corporate governance	Has been instrumental in several regional infrastructure projects, agricultural development initiatives, and has played a key role in advocating for African interests on the global stage.	Highlights the importance of regional cooperation and the need for sustainable funding mechanisms.	Supported by commitment from African governments and international donors, but often hindered by political instability and lack of consistent investment.	NEPAD was instrumental in establishing the African Peer Review Mechanism (APRM)	https://www.nepad.org/microsite/who-we-are-0#leadership	No direct private sector engagement, hence excluded	Chat GPT
41	Partnership for Aflatoxin Control in Africa (PACA)	PACA is a partnership that brings together African Union member states, development partners, research institutions, and the private sector to address the challenge of aflatoxin contamination in food and feed. Aflatoxins are potent carcinogens produced by certain molds that can contaminate crops, posing significant health risks.	African Union Commission	https://www.linkedin.com/in/amare-ayalew-32126155/?originalSubdomain=et	Supported by various international donors including the United States government, which announced significant funding support during the AGOA Forum.	Engages with stakeholders across multiple sectors including agriculture, trade, health organizations, private sector, civil society groups, and development partners to manage aflatoxin mitigation efforts.	Ranges from small-scale farmers to large agro-processing companies.	Primarily involved in grains (like maize) and nuts (like groundnuts) where aflatoxin contamination is prevalent.	Supports agricultural development, consumer health, and facilitates trade by coordinating and intensifying effective control of aflatoxins along agricultural value chains in Africa.	Includes training on aflatoxin management practices, provision of equipment and resources for aflatoxin testing, and facilitation of access to improved storage and processing facilities to reduce contamination risks.	2012	Established, with ongoing programs and activities.	Across Africa	Supporting agricultural development, protecting consumer health, and facilitating trade through effective aflatoxin control. vision is for an Africa free from the effects of aflatoxins.	PACA Strategy 2013-2022 outlines the framework for action and coordination among stakeholders.	Operated under the coordination of the African Union Commission, involving multiple stakeholders including government bodies, private sector entities, and international partners.	Operates within areas such as research, policy development, trade enhancement, capacity building, and public awareness to prevent and control aflatoxins.	Contributed to improved food safety standards, enhanced public health, and increased market access for African agricultural products.	The critical need for integrated approaches combining regulation, technology, and community engagement to effectively manage aflatoxin risks.	Supported by international funding and multi-sectoral collaboration; hindered by challenges in widespread adoption of best practices and technologies at the local farming level.	PACA's initiatives are crucial not only for food safety but also for enabling African farmers to meet the stringent quality standards required for international markets, thereby supporting economic growth through agriculture.	https://www.aflatoxinpartnership.org	Focus only on one specific area - aflatoxin, No nutrition-specific focus, hence excluded.	Google
42	The African Green Revolution Forum (AGRF)	AGRF is a platform that brings together stakeholders from across Africa and beyond to discuss and advance policies and investments in agricultural transformation. It focuses on promoting innovation, entrepreneurship, and sustainable development to improve food security and nutrition in Africa.	Managed by a group of partners including the Alliance for a Green Revolution in Africa (AGRA), African governments, and various international development partners.	https://www.linkedin.com/in/amath-pathe-sene-48a7ab4a/?originalSubdomain=it	Funded by a range of international donors, including international development agencies, African governments, and private foundations.	Brings together stakeholders, including governments, the private sector, civil society, and development partners to discuss and commit to advancing the agricultural sector on the continent	From small and medium enterprises to large corporations are involved, reflecting the diverse nature of the agricultural sector in Africa.	The forum addresses multiple aspects of the food value chains, including crop production, animal husbandry, agro-processing, and marketing.	Facilitates discussions and actions on national, regional, and continental priorities for the agricultural sector, including policy reforms, investment facilitation, knowledge sharing, partnership development, and leadership cultivation.	Includes workshops, seminars, and presentations on various topics such as sustainable farming techniques, supply chain improvements, and access to new markets.	2010	Established, serving as an annual event that has significant impact on shaping the agricultural policies and practices in Africa.	Across Africa	Vision is centered around inclusive and sustainable food systems transformation. Their mission is to catalyze the transition to sustainable, resilient, and inclusive food systems that support the SDGs by 2030.	improving agricultural productivity, reducing poverty and hunger, and promoting agricultural sustainability.	Organized annually with a series of pre-events, plenary sessions, and side events that allow for comprehensive engagement across all levels of the agricultural value chain.	Six strategic objectives: agenda setting, evidence-based policy reform, investment facilitation, knowledge sharing, partnership development, and leadership cultivation.	Has significantly influenced agricultural policies, increased investment in agriculture, and fostered greater innovation across the sector.	The importance of integrating digital technologies in agriculture and the need for more inclusive financing models have been emphasized as key areas for development.	Supported by strong partnerships and international commitment; however, challenges include translating policies into action and ensuring the sustainability of agricultural advancements.	AGRF has been rebranded as the Africa Food System Forum	https://agrf.org	Focus on agricultural development. No nutrition-specific focus, hence excluded.	Chat GPT
43	East African Community (EAC)	The EAC is a regional intergovernmental organization aimed at promoting economic, social, and political integration among its member states to ensure balanced and sustainable development.	Self-lead	Chaired by South Sudanese Minister, cant find email for him; general contact email is eac@eachq.org	Funded by member states, development partners, and various international donors.	Engages with various private sector entities through platforms like the EAC Buyer-Seller platform, aimed at enhancing intra-EAC trade and investment in goods and services​	Involves entities of all sizes, from micro-enterprises through to large multinational corporations operating within the region.	Impacts multiple agricultural value chains, focusing on enhancing regional food security, improving agricultural productivity, and facilitating agribusiness.	Provides various forms of support, eg: the EAC Investment Guide for understanding the investment climate and incentives, and the EACPass for facilitating safe travel by integrating COVID-19 test results and vaccination certificates among partner states	Includes regulatory reforms, customs harmonization, and development of regional infrastructure to reduce the cost of doing business across borders.	2000	Established; actively working towards deeper integration including a monetary union.	Democratic Republic of Congo, Republic of Burundi, Republic of Kenya, Republic of Rwanda, Federal Republic of Somalia, Republic of South Sudan, Republic of Uganda, and United Republic of Tanzania	ims to be create prosperous, competitive, secure, stable, and politically united East Africa, improving the quality of life for East Africans through increased competitiveness, value-added production, trade, and investments	Governed by the Treaty for the Establishment of the East African Community which outlines the principles and framework for regional integration. https://www.eacj.org/?page_id=33	Includes various institutions such as the East African Legislative Assembly, East African Court of Justice, and sectoral councils and committees.	No information found	Includes increased trade and investment flows, improved infrastructure, and enhanced political cooperation.	The importance of political will and alignment of national policies with regional objectives is critical for the success of integration.	Supported by a commitment to regional integration but often hindered by varying national interests, political instability, and infrastructure deficits.	The EAC is actively working towards establishing a single currency for the region by 2024, which aims to further ease trade and economic integration among the member states.	https://www.eac.int	No direct private sector engagement, hence excluded	Chat GPT
44	Economic Community of West African States (ECOWAS)	ECOWAS is a regional political and economic union aimed at promoting economic integration across West African countries. It facilitates free movement of people, goods, and services, and aims to achieve collective self-sufficiency for its member states.	Self-lead	President of Nigeria - general contact info is info@ecowas.int	Funded by member state contributions, international development partners, and various international financial institutions.	Engages with various private sectors across the region, focusing on industry, transport, telecommunications, energy, agriculture, natural resources, commerce, monetary and financial issues, social as well as cultural matters​	Includes a diverse range of business sizes, from micro to very large enterprises.	Involved in various food value chains particularly in agriculture, focusing on improving productivity, market access, and sustainability.	Aims to foster collective self-sufficiency for its member states by creating a single large trade bloc through economic cooperation.	Includes harmonization of agricultural policies, trade liberalization measures, and investment in infrastructure to enhance regional trade.	1975	Established, with ongoing initiatives aimed at deepening economic integration and political cooperation.	enin, Burkina Faso, Cabo Verde, Cote d'Ivoire, The Gambia, Ghana, Guinea, Guinea-Bissau, Liberia, Mali, Niger, Nigeria, Senegal, Sierra Leone, and Togo	ain goal is to achieve "collective self-sufficiency" for its member states, improving economic integration, and living standards, and promoting economic development in the region	ECOWAS operates under a treaty that outlines its framework and objectives for regional integration. https://www.ecowas.int/publication/treaty/#:~:text=The%20Economic%20Community%20of%20West,in%201975%20in%20Lagos%2C%20Nigeria.	Comprises several institutions including the ECOWAS Commission, the Community Court of Justice, and the ECOWAS Parliament	No information found	Has facilitated significant advances in regional trade, enhanced political dialogue, and contributed to regional peacekeeping efforts.	Highlights the importance of political will and infrastructural investment for successful regional integration.	Progress is supported by robust institutional frameworks but hindered by political instability, infrastructure deficits, and disparate economic development levels among member states.	ECOWAS has a vision of moving from an "ECOWAS of States" to an "ECOWAS of the People" by 2050, emphasizing peace and prosperity for all	https://www.ecowas.int	No direct private sector engagement, hence excluded	Chat GPT
45	The Southern African Development Community (SADC)	SADC is a regional organization that aims to promote sustainable and equitable economic growth and socio-economic development through efficient productive systems, deeper cooperation and integration, good governance, and durable peace and security among its member states in Southern Africa.	The initiative is led by the member states of the SADC, with a secretariat based in Gaborone, Botswana.	Currently lead by President of Angola; general inquriy email is registry@sadc.int	Funded by member states' contributions and supported by various international partners including the European Union, United Nations, and African Development Bank.	Engages with the private sector to drive regional value chains, accelerating industrialization and regional integration	Ranges from small and medium enterprises to large multinationals operating within the region.	Engages sectors across agricultural production, including livestock, fisheries, crops, and agro-processing.	As several projects and initiatives to promote peace and security, trade facilitation, investment and business environment improvement, industrialization, and productive sectors support,	Includes infrastructure development, trade facilitation, capacity building, and policy advocacy to improve business environments.	1992	Established	Angola, Botswana, Comoros, Democratic Republic of Congo, Eswatini, Lesotho, Madagascar, Malawi, Mauritius, Mozambique, Namibia, Seychelles, South Africa, Tanzania, Zambia, and Zimbabwe	development, peace and security, economic growth, alleviate poverty, enhance the standard and quality of life of the peoples of Southern Africa	https://www.sadc.int/sites/default/files/2021-08/Charter_of_the_Fundamental_Social_Rights_in_SADC2003.pdf - details the foundational goals and operational frameworks.	Governed by a Summit of Heads of State or Government and has a Secretariat for administrative functions. It also includes various councils, committees, and units that focus on specific sectors and issues.	Regional Indicative Strategic Development Plan 2020-2030​	Notable for its role in fostering regional stability, economic cooperation, and integration. It has also been effective in addressing infrastructure and industrial development challenges.	The importance of regional cooperation in economic policy and conflict resolution, and the need for continuous adaptation to global economic changes.	Supported by strong political commitment from member states; however, it faces challenges such as economic disparities among members and external dependency on donor funding.	SADC initiated the Protocol on Mining in 1997, which is one of its many sectoral protocols aimed at harmonizing policies and leveraging resources for regional development.	https://www.sadc.int	No direct private sector engagement, hence excluded	Chat GPT
46	Association for Strengthening Agricultural Research in Eastern and Central Africa (ASARECA)	ASARECA collaborates with research institutions, governments, and businesses to provide technical assistance and promote innovations that address challenges in food markets and value chains in Eastern and Central Africa	National Agricultural Research Institutes (NARIs) of member states.	ASARECA Secretariat, Plot 5 Mpigi Road, P.O.Box 765, Entebbe, Uganda; Tel: +256 414 320212; Email: asareca@asareca.org	Member states and development partners.	Agricultural businesses, including smallholder farmers.	Ranges from micro to large, depending on the sector and project specifics.	Primarily engaged in agricultural crops and livestock.	Technical assistance, research and development, policy advocacy.	Climate-smart agriculture training, market information systems, and agricultural technologies.	1994	Established	Burundi, Cameroon, Central African Republic, DRC, Eritrea, Ethiopia, Kenya, Madagascar, Republic of Congo, Rwanda, Somalia, South Sudan, Sudan, Tanzania, Uganda.	To transform agriculture for improved livelihoods and economic growth in alignment with sustainable development goals and regional agendas.	The organization’s activities are aligned with creating regional public goods and supporting regional agricultural initiatives​.	Governed by a Council of Ministers and a Board of Directors comprising representatives from member states	monitoring of project outcomes and impacts related to agricultural research and policy implementation​	Enhanced regional cooperation in agricultural research and policy-making.	The importance of regional collaboration and sharing of resources and knowledge for effective agricultural improvement​	Challenges include funding constraints and political variability among member states; supports include strong regional networks and donor partnerships​		http://www.asareca.org/	Focus on agriculture only - hence excluded	Chat GPT
47	Food Trade and Nutrition in Africa (FTNA) Program	FTNA is a consortium of research institutions, government agencies, and private sector partners that aims to improve food security, trade, and nutrition in Africa. It conducts research and implements interventions to address food system challenges and promote better nutrition outcomes	Cannnot find any information for a program under this name																				Focus on agriculture only - hence excluded	Chat GPT
48	African Business Coalition for Health (ABCHealth)	ABCHealth is a private sector-led coalition that works to mobilize businesses to invest in health and wellness initiatives across Africa. While its primary focus is on health, including nutrition, ABCHealth collaborates with governments and other stakeholders to address malnutrition and promote healthy lifestyles on the continent	Initiated by the Aliko Dangote Foundation and GBCHealth​ (New African Magazine)​.	info@abchealth.com https://www.linkedin.com/in/dr-mories-atoki-hon-73152a15b/ (CEO of ABC Health: Dr. Mories Atoki)	Supported by major African businesses and philanthropic leaders like Aliko Dangote, as well as international partnerships with organizations such as the Bill and Melinda Gates Foundation	African Healthcare sector	Large and very large entities.	Not mentioned specifically, there is a focus on health	"- Consulting services - Training and education - Policy Analysis - Networking and collaboration"	Includes advocacy, mobilization of resources, partnership building, and direct engagement in health programs to improve outcomes​	2020	Emerging	All locations in Africa (North, South, East, West)	"Our Vision To be the go-to partner for businesses seeking to further Africa’s prosperity through tangible health goals for generations to come. Our Mission Connect African businesses with their communities to access quality healthcare and create prosperity through collaboration which actions meaningful change for individuals, businesses and economies."	Focuses on mobilizing private sector influence and resources for health outcomes in Africa. More details might be available directly from their publications or official communications.	Comprises a coalition of member businesses and philanthropic leaders with a governance structure likely involving a board of directors and strategic committees​	- Program evaluations - Performance monitoring - Quality Assurance - Stakeholder assessment"	Significant efforts in mobilizing funds and partnerships aimed at transforming health care in Africa, although specific metrics of success are not detailed.	The critical role of the private sector in health financing in Africa and the need for strong partnerships between the public and private sectors to enhance health outcomes	Challenges include the vast health needs across the continent and limited public funding. Supportive factors include strong leadership within the coalition and growing private sector involvement in health	"- Covers a broad range of 54 African countries - Meetings and news updates - Knowledge hub offers knowledge and info related to health developments in Africa"	https://abchealth.com/	Led by private sector, hence excluded	Chat GPT

## Sheet: Indepth initiatives
Sno.	Name of the initiative, year founded	Brief description	Host Organizations	Overall goals (vision/mission)	Geographical focus	Profile of private sector engaged (size, value chain position)	Mode of private sector engagement	Donor/Funder of the initiative	Other financial details	Maturity stage (Nascent, Emerging, Established)	Terms of reference (Pls provide a link if available)	M&E framework (metrics of assessment)	Reported impact if any	Reported lessons learnt if any	Reported best practices	Factors supporting or hindering progress of the initiative	Relationship with other similar initiatives	Relationship with the government	Contact details of chair/leader (emails or linked in)	Notes (any interesting things on website)	Link	Interview questions
	SUN Business Network (SBN)	World leading private sector platform focussed on nutrition. Global network of businesses committed to improving nutrition. Focuses specifically on mobilizing the private sector to contribute to improving nutrition outcomes. It encourages businesses to integrate nutrition considerations into their core operations, supply chains, and product offerings. By engaging the private sector, the network a…	GAIN & WFP	To reduce malnutrition in all its forms by fostering private sector engagement and action in nutrition, aligned with the SUN Movement's vision of a world free from malnutrition by 2030.	Global	SBN engages a wide range of businesses from multinational companies to SMEs across the agri-food value chain. Global members - Arla foods, Amway, Ajinomoto, Aviario Paula,	Advocacy and Awareness on the role of private sector for advancing nutrition Capacity Building and Technical Assistance Partnerships and Collaboration Monitoring and Evaluation	The Ministry of Foreign Affairs for the Netherlands, Irish Aid, SUN Movement		Established	https://scalingupnutrition.org/wp-content/uploads/2020/07/SUN-Strategy3_draft_MAIN-DOCUMENT_ENG.pdf	ENABLING BUSINESS TO ADVANCE NUTRITION INDEX '	No metrics provided; impacts likely have improved SME capabilites, gender priorities, and enhanced national level nutrition investment	No information found		No information found			https://www.linkedin.com/in/ritta-shine-8546aa49/?originalSubdomain=tz		https://sunbusinessnetwork.org
	Alliance for a Green Revolution in Africa (AGRA)	AGRA is a partnership between the African Union and the Rockefeller Foundation that aims to catalyze agricultural transformation in Africa. It works with governments, farmers, civil society, and the private sector to increase agricultural productivity, improve market access, and enhance food security on the continent.	African Union and Rockefeller Foundation	Overarching goal is to double the yields and incomes of smallholder households in its focus countries, aiming to significantly increase food security and transform agriculture into a sustainable and profitable business for farmers.	Prioritized operations in 11 countries across different agro-ecological zones, including the Guinea Savannah and East African Highlands					Established	https://agra.org/wp-content/uploads/2023/08/AGRAs-Five-Year-Strategy_Sustainably-Growing-Africas-Food-Systems.pdf	Includes the use of various monitoring and evaluation tools, as outlined in its publications, which include the Africa Agriculture Status Report and Food Security Monitor. These tools provide detailed assessments of the impact of AGRA's programs and the progress toward its targets	Please see annual report here: https://agra.org/wp-content/uploads/2023/11/AASR-2023.pdf	Please see annual report here: https://agra.org/wp-content/uploads/2023/11/AASR-2023.pdf		Please see annual report here: https://agra.org/wp-content/uploads/2023/11/AASR-2023.pdf				Also places emphasis on climate change adaptation, inclusivity, and improving nutrition.	https://agra.org
1	Access to Nutrition Initiative (ATNI), 2013	Assesses and ranks the world's largest food and beverage manufacturers on their contributions to addressing global nutrition challenges. Encourages companies to improve their products, practices, and policies to support healthy diets and combat malnutrition.	Access to Nutrition Foundation (Global nonprofit)	A world where markets contribute to providing access to nutritious and affordable diets for all, aiming for at least half of all food & beverage sales to be derived from healthy products by 2030.	Developed: United States, United Kingdom, Germany Developing: Asia: Bangladesh, India South East Asia: Indonesia, Vietnam Africa: Kenya, Nigeria,Tanzania	Multi-national food and beverage companies Food processing and Food retail	Collaboration and Convening (CC) Commitments and monitoring (CM)	Bill & Melinda Gates Foundation Global Alliance for Improved Nutrition (GAIN) Irish Aid PICTET Rockefeller Foundation UK Aid Waterloo Foundation World Health Organization (WHO)	See Annual Report 2020, 2021 and 2022	Established	https://accesstonutrition.org/news/why-access-to-nutrition-initiatives-new-strategy-aims-to-transform-markets-for-healthier-food/	Utilizes various indexes and benchmarks, such as the Global Index, the India Index, and the UK Retailer Index, to assess and rank the world's largest food and beverage companies on their nutrition-related practices​	Some limited information in Annual reports and Impact stories. See impact stories here: https://accesstonutrition.org/old-impact/. info@accesstonutrition.org	No information found	None	One significant challenge is the lack of a standardized definition of "healthy" food, leading companies to apply varying criteria	World Benchmarking Alliance, Good Food Finance Network, Netherlands Working Group on International Nutrition, SDG2 Advocacy Hub, Food Action Alliance, GAIN, ShareAction, iGravity		https://www.linkedin.com/in/gsgarrett/?originalSubdomain=ch	Emphasizes accountability within the private sector for improving access to nutrition, using a variety of reports and tools to measure and encourage progress toward healthier products and practices.​ Potential interviewees (Executive Director, Data & MEL Senior Manager, Partnership Managers, Research Director, Responsible Investor Engagement Manager) see website: https://accesstonutrition.org/peo…	https://accesstonutrition.org/
2	Business Call to Action (BCtA), 2010	A global initiative that encourages businesses to develop innovative business models that contribute to the achievement of the Sustainable Development Goals (SDGs). It promotes inclusive business practices, including initiatives that improve access to nutritious food and address malnutrition in underserved communities	United Nations Development Program (UNDP)	Encourage businesses to take collective action to improve the lives of people in low- and middle-income markets and contribute to the Sustainable Development Goals	Africa: Burkina Faso, Kenya, Niger, Nigeria, South Africa, Somalia, Senegal Asia: India, Bangladesh, Indonesia Latin America: Ecuador Middle East: Jordan	Works with businesses of all sizes from micro-small and medium enterprises to multi-national companies All segments of the food value chain	Collaboration and Convening (CC) Capacity building (CB) Commitment and Monitoring (CM)	Asian Development Bank German Ministry for Economic Cooperation and Development Deutsche Gesellschaft für Internationale Zusammenarbeit (GIZ)	Available in Annual Report	Established	No information found; however, as a UNDP initiative, the UNDP's strategic plan may be of use: https://www.undp.org/sites/g/files/zskgke326/files/2022-07/UNDP%20Strategic%20Plan%202022-2025.pdf	Said tools and services are assessment tools for organizations: impact measurement and management, SDG tracking, inclusive business management and tracking tools	Available in annual reports, mid-year reports and impact case studies	No information found	Kampala Principles on Effective Private Sector Engagement in Development Cooperation	No information found; insights would be derived by use of the available resources that BCA provides	Global Partnership for Effective Development Cooperation (GPEDC)	Swedish International Development Cooperation Agency, Ministry of Foreign Affairs of the Netherlands	https://www.linkedin.com/in/lucianaaguiar/	Supported by international partners like the Ministry of Foreign Affairs of the Netherlands, Swedish International Development Cooperation Agency, Asian Development Bank, among others. Potential interviewees (Program Manager, Impact Management Specialist, Social Impact Consultant ) see website: https://www.businesscalltoaction.org/about-bcta	https://www.businesscalltoaction.org
3	Business Platform for Nutrition Research (BPNR), 2013	A multi-stakeholder platform for defining, funding, and disseminating new pre-competitive research to improve nutrition in the developing world and for sharing existing knowledge that can impact the sector.	Global Alliance for Improved Nutrition (GAIN)	Business Platform for Nutrition Research (the Platform) aims to address under-nutrition in developing countries.	America Africa Asia	Multi-national organizations in food and pharmaceuticals Agriculture and Food processing	Collaboration and Convening (CC) Capacity building (CB)	Government of Canada	Not specified	Established	No information found	The expected intermediate outcomes for the Business Platform for Nutrition Research include: (1) increased purchase and consumption of micronutrient-rich foods by the poor; and (2) improved ability to detect malnutrition risk and measure benefits of nutrition interventions. No more information found.	Defined: Specific research agenda Delivery model Governance structure Formally launched BPNR at the UN General Assembly in September 2013.	No more information found.	No more information found.	No more information found.	No more information found.	No more information found.	No more information found.		http://www.developmenthorizons.com/2017/06/innovative-funding-models-to-support.html https://globalnutritionreport.org/resources/nutrition-growth-commitment-tracking/global-alliance-for-improved-nutrition-gain/#:~:text=The%20Business%20Platform%20for%20Nutrition,research%20and%20development%20for%20nutrition. https://w05.international.gc.ca/projectbrowser-banqueprojets/project-projet/details/D000…
4	Food Systems Dashboard (FSD) and Food System Countdown Initiative (FSCI), 2020	An online dashboard that contains information on a wide range of food environment indicators. The Food System Countdown Initiative is a newer initiative that builds on the Food Systems Dashboard and is working to build a science-based observational system using a food systems framework to track global food systems and their changes to 2030.	Columbia Climate School Cornel University Food and Agriculture Organisation (FAO) Global Alliance for Improved Nutrition (GAIN)	Food Systems Dashboard (FSD) brings together country-level data across all components of the food system and provides deeper analysis and guidance on how to use this data in meaningful ways. Food system countdown initiative, an accountability mechanism to produce annual publications to measure, assess, and track the performance of global food systems toward 2030 and the conclusion of the Sustaina…	Asia: Bangladesh, India, Pakistan South East Asia: Indonesia Africa: Kenya, Mozambique, Nigeria, Ethiopia, Rwanda Latin America: Brazil, Mexico	Although it is suggested that businesses might like to use the dashboard, there does not appear to be any direct engagement with the private sector.	Capacity building (CB)	The Rockefeller Foundation Federal Ministry of Economic Cooperation and Development (BMZ) Netherlands Ministry of Foreign Affairs Swiss Agency for Development and Cooperation (SDC) Irish Aid International Development Research Centre (IDRC)	Free to use	Emerging	https://www.foodsystemsdashboard.org https://www.foodcountdown.org/indicator-architecture	In some ways the FSCI acts like an M&E framework for FSD. Both FSD and FSCI have their own conceptual frameworks.	FSCI has had some publications, but not much in the way of reported impact yet.	No information	No information	Lack of real time data in FSD	FSD and FSCI are interlinked.	FAO is involved, Many of the academics involved in the FSCI have links to government as advisors	FSD- Ty Beal- GAIN; FSCI- Jess Fanzo- Columbia	The list of experts on the FSCI is impressive and a who's who of food system researchers.	https://www.foodsystemsdashboard.org https://www.foodcountdown.org/indicator-architecture	? what is the role of the private sector in this iniative? Were private sector players consulted in the set up the initatives? Why is data so lagging? Who is responsible for updating it?
5	Global Nutrition Report (GNR), 2014	The world’s leading independent assessment of the state of global nutrition. It provides the best available data, in-depth analysis and expert opinion rooted in evidence to help drive action on nutrition where it is urgently needed. Through a comprehensive report, the Nutrition Accountability Framework, interactive Country Nutrition Profiles and Nutrition for Growth Commitment Tracking, the GNR s…	PATH (Report host in 2023)	A world free from malnutrition in all its forms.	194 countries world wide	Works with businesses of all sizes from micro-small and medium enterprises to multi-national companies All segments of the food value chain	Collaboration and Convening (CC) Commitments and monitoring (CM)	Bill and Melinda Gates Foundation European Commission Government of Canada Federal Ministry of Economic Cooperation and Development – Germany (BMZ) UK Foreign, Commonwealth and Development Office (FCDO) The World Bank	Not mentioned	Established (given that it has been around for 10 years)	https://globalnutritionreport.org/documents/657/Terms_of_reference_Global_Nutrition_Report_Independent_Expert_Group_70bzaKE.pdf	Monitoring and evaluation will be done to enable a continuous feedback loop that empowers the GNR to adjust, refine and strengthen its approach in real-time and to inform specific evaluation and learning moments. Based on this strategic vision, a results framework will be developed to monitor and evaluate GNR’s work. As part of this process, the strategic vision will also be periodically reviewed…	The GNR will also undertake research to understand how its content and products are being used by key stakeholders and target audiences. This will enable the GNR to gain a more detailed understanding of the objectives it is driving, and to capture important insights about how the GNR can be improved to best meet needs, and to most effectively contribute to efforts to end malnutrition in all its f…	Not mentioned	Not mentioned	Not mentioned	Not mentioned	Not mentioned		The GNR does not: • Directly advocate for nutrition action with specific stakeholders. • Directly hold actors to account through products and engagement with stakeholders. • Replace existing country-level data, evidence and reporting systems. • Build capacities of stakeholders.	https://globalnutritionreport.org/about/	Private sector representation in the stakeholder group? Another review assessment planned? Consolidate already existing commitments (e.g. Zero Hunger Private Sector Pledge) vs new commitments? Are these commitments additional or something that the company is any way doing? Impact on influencing the private sector? No new commitments since Nov 2022? Doe GNR convene private sector actors? What kind…
6	Private Sector Mechanism (PSM) to the United Nations Committee on World Food Security (CFS), 1996	Provides a platform for dialogue and collaboration between the Food and Agriculture Organization (FAO) and the private sector on food security and nutrition issues. It engages businesses in policy discussions, partnerships, and initiatives to address hunger and malnutrition globally.	International Agri-Food Network	To ensure food security and good nutrition for all, contributing to the achievement of the Sustainable Development Goals.	All UN member states	Works with businesses of all sizes from micro-small and medium enterprises to multi-national companies. However, most of the members are large multi-national companies. All segments of the food value chain. However, concentrated on Agriculture and Food Processing	Collaboration and Convening (CC) Capacity building (CB)	Abbott Laboratories Bayer Cargill Danone Export Trading Group Federalimentare Gallup Global Agribusiness Alliance IAFN International Council of Beverage Associations International Dairy Federation Mead Johnson Nutrition Nestle Pick Foundation Piscari Industries Rabobank Sight & Life (DSM) Syngenta Crop Protection Tetra Laval USCIB Unilever Yara International	membership is expensive…. You can be a 'supporting member' for 13K Euro, a contributor for 3K Euro or a non- paying member.	Established	https://agrifood.net/wp-content/uploads/2022/05/Brochure-2019-PSM-1.pdf	Contributes to and engages with the workstreams of the CFS, which includes various topics like nutrition, sustainable agricultural investment, and smallholder investment.	See annual reports: https://agrifood.net/psm/about/	See annual reports: https://agrifood.net/psm/about/		See annual reports: https://agrifood.net/psm/about/			Micheal Keller, Secretary-General of the International Seed Federation https://www.linkedin.com/in/michael-keller-b81365138/?originalSubdomain=ch	PSM has been an active participant in the annual sessions of the CFS, bringing together representatives from the private sector to engage in dialogue and contribute to the policy-making process	https://agrifood.net/psm	Is it only a discussion forum? What do members do on the macrocommittees? How have the priorities been picked? Why are some foundations and scholarship programs part of this? Why so many North American members- is it LMIC focused? What is its biggest success? Has this been effective? Why would this be part of world food forum?
7	SUN Business Network (SBN) Global, 2012	A dedicated platform that convenes the private sector around nutrition across SUN countries. Focuses specifically on mobilizing the private sector to contribute to improving nutrition outcomes. It encourages businesses to integrate nutrition considerations into their core operations, supply chains, and product offerings. By engaging the private sector, the network aims to leverage the resources, …	Global Alliance for Improved Nutrition (GAIN) World Food Program (WFP)	By 2030, a world free of all forms of malnutrition by bringing together the private sector, government, and other stakeholders to take joint, practical actions to accelerate private sector contributions to improved nutrition.	United Kingdom	Works with businesses of all sizes from micro-small and medium enterprises to multi-national companies. However, most of the members are large multinational companies. All segments of the food value chain. However, concentrated on food processing. Also works with non-food companies providing digital and mobile services.	Collaboration and Convening (CC) Capacity building (CB) Commitment and Monitoring (CM)	The Ministry of Foreign Affairs for the Netherlands Irish Aid SUN Movement	Not found	Established	Not found. SBN Strategy 3.0 (2022-2025) available	GLOBAL - Not found REGIONAL - Not found NATIONAL - To gain an understanding of progress being made by businesses in their nutrition commitments, most national SBN networks conduct an annual survey – taking note of whether they have made improvements to quality, pricing, and/or the volume of nutritious and safe foods. The survey also aims to collect insights on member partnerships facilitated by S…	GLOBAL - Not found REGIONAL - Not found NATIONAL - 2015 - 3 fully established and operational SBNs 2020 - 18 fully established country networks and 26 under development	GLOBAL - Not found REGIONAL - Not found	GLOBAL - Not found REGIONAL - Not found	GLOBAL - Not found REGIONAL - Not found	GLOBAL - Not found REGIONAL - Not found	SBN Advisory Group - Includes representatives from the public sectors (WFP, GAIN, SUN movement coordinator)	Global Coordinator - RITTA SHINE Global Partnerships - RUTH MUNYINYI Africa Regional Manager - MARGARET NGETHA Knowledge Leadership Senior Manager - CHRISTINA NYHUS DHILLON	Development of national SBNs is demand-driven which gives the SBN a ‘bottom-up’ focus and national ownership.	https://sunbusinessnetwork.org	Progress update of regional network? Kind of support - Types of technologies, technical assistance, innovation support provided by global members Impact - Pls give examples of SBN business members who are acting, investing, and innovating in responsible and sustainable actions to improve nutrition while balancing planetary health with human health/examples of meeting objectives/success examples a…
8	SUN Business Network (SBN) Ethiopia, 2017			Be the focal point for private sector engagement on nutrition. To improve and strengthen the private sector’s contribution towards improving nutrition in Ethiopia.	Ethiopia	Works with businesses of all sizes, from micro-small and medium enterprises (MSMEs) to multi-national companies. However, most of the members are MSMEs. All segments of the food value chain. However, concentrated on agriculture and food processing.		Irish Aid, Ethiopia
9	SUN Business Network (SBN) Nigeria, 2016			To be the focal point for private sector engagement on nutrition in Nigeria. To strengthen private sector contributions towards improving nutrition in Nigeria.	Nigeria	Works with businesses of all sizes, from micro-small and medium enterprises (MSMEs) to multi-national companies. However, most of the members are MSMEs. All segments of the food value chain. However, concentrated on agriculture and food processing.		HarvestPlus Nigeria FATE Foundation
10	SUN Business Network (SBN) Tanzania, 2015			To improve and strengthen the private sector’s contribution towards improving nutrition in Tanzania. To be the focal point for private sector engagement on nutrition in Tanzania.	Tanzania	Works with businesses of all sizes, from micro-small and medium enterprises (MSMEs) to multi-national companies. However, most of the members are MSMEs. All segments of the food value chain. However, concentrated on agriculture and food processing.		NMB Bank The Tanzania Agricultural Development Bank Sahara Ventures ONA Enterprise Ltd. The Partnership for Nutrition in Tanzania (PANITA)				Sahara Ventures: To improve the training and participant experience for each Lishe Accelerator cohort, Sahara Venture and SBN Tanzania, and the Global Alliance for Improved Nutrition (GAIN) co-organised an Accelerator Reflection Session with SMEs and judges at the end of every competition. Feedback has included the need to extend the programme duration, and include more peer-to-peer learning oppo…	Nine years since launching Delco Limited, a dairy business and member of the Scaling Up Nutrition Business Network (SBN) Tanzania, Delphinius Penessis has transformed it from a cheese making enterprise into a successful yoghurt and fermented milk processing brand that has captured the markets and hearts of rural Tanzanians. The School Feeding Initiative (PANITA): SBN Tanzania provided schools wit…	Sahara Ventures: In the wake of COVID-19, Sahara Ventures and SBN Tanzania are also looking to revise the training modules to enable SMEs to adopt new approaches to build their resilience post-pandemic. The project should look into launching an incubation programme to support start-ups, as most are not developed enough to qualify for the investment-readiness programme. To make the competition inc…	The School Feeding Initiative: Involving all players, including children, their parents, schools, and food suppliers, has also created ripple effects beyond the initiative, as they are able to spread the nutrition message in their communities, and the suppliers have now embraced fortification in their other ventures. Sahara Ventures: The project is already seeking to work with partners such as Th…			The School Feeding Initiative: A key factor in successful implementation was the involvement of the government at both the national and grassroots level. This ensured governments felt they were part of the project from its planning to its execution, and gave policymakers a chance to establish commitments in their zones to ensure access to nutrition for all	SBN National Coordinator - Ms Haika Malleko, hmalleko@gainhealth.org			Latest strategy M&E reports
11	Zero Hunger Private Sector Pledge, 2021	An initiative launched by the United Nations World Food Programme (WFP) to engage businesses and corporations in the global effort to achieve Zero Hunger by 2030. The Pledge offers a roadmap to end hunger, with which companies can align their actions to scientific evidence, alongside international organizations and national governments. This roadmap identifies 90 priority countries and 10 interve…	Shamba Centre for Food & Climate (Non-governmental organization (NGO))	To foster accountability, encourage impact-driven actions, and pave the way for participation of additional private sector actors to join the global movement to end hunger.	Companies have pledged in 48 countries, with a focus on priority regions of Africa, Asia, and Latin America	Works with businesses of all sizes, from micro-small and medium enterprises (MSMEs) to multi-national companies. However, most of the members are MSMEs. All segments of the food value chain. However, concentrated on agriculture and food processing.	Collaboration and Convening (CC) Commitments and monitoring (CM)	African Union Development Agency New Partnership for Africa's Development (AUDA-NEPAD) Food and Agriculture Organization (FAO) Global Alliance for Improved Nutrition (GAIN) Grow Africa Grow Asia International Fund for Agricultural Development (IFAD) International Institute for Sustainable Development (IISD) Shamba Centre for Food & Climate World Benchmarking Alliance (WBA) World Business Council …

## Sheet: Organizations
Sno.	Name of the organization	Brief description	Type of private sector engaged	Geographical location of the private sector supported	Size of private sector engaged (Micro, small, medium, large, very large)	Food value chains that the engaged private sector actors are operating in (e.g. fruits, vegetables etc.)	Support provided to the private sector	Details of support provided e.g. nutrition education, food safety training, digital tools etc.	Year Support Started	Overall goals (vision/mission)	Terms of reference (Pls provide a link if available)	Structure of the engagement	M&E framework (metrics of assessment)	Reported impact if any	Reported lessons learnt if any	Factors supporting or hindering progress of the initiative	Notes (any interesting things on website)	Link	Comment
49	United Nations Industrial Development Organization (UNIDO)	UNIDO assists food-related businesses in Africa by providing capacity-building support in areas such as food processing technology, quality standards, and food safety practices	various industries, including agribusiness, pharmaceuticals, and renewable energy sectors	Operates globally, with a focus on developing and transition economies, least developed countries (LDCs), and sub-Saharan Africa.	Engages primarily with micro, small, and medium-sized enterprises.	Supports value addition to agricultural output, reduction of post-harvest losses, increasing food security, food safety, and nutrition, particularly through agri-business development and upgrading agro-food value chain	Technical support, capacity building, technology and knowledge transfer, investment promotion, and assistance in meeting international standards for food safety and hygiene.	Examples include helping the Ceylon cinnamon industry enhance competitiveness and meet export market requirements, upgrading national quality systems (e.g., Iraq's National Quality System), and promoting sustainable energy solutions	Established in 1996	Promote inclusive and sustainable industrial development (ISID) to reduce poverty, accelerate economic growth, and ensure environmental sustainability.	https://www.unido.org/sites/default/files/unido-publications/2023-11/online_PPP_BROCHURE%20%281%29_0.pdf	approach includes public-private partnerships (PPP), international cooperation, and working closely with governments and the private sector to implement projects.	comprehensive evaluation and internal oversight framework to assess the impact and effectiveness of its projects, including quality assurance and control measures.	varies by project; eg. the support to the Ceylon cinnamon industry has enhanced quality and food safety compliance, while the upgrading of Iraq's National Quality System has improved trade performance and consumer protection.	project-dependent but generally emphasize the importance of stakeholder engagement, capacity building, and adaptability to local contexts.	level of public-private cooperation, the regulatory environment, and the capacity of local institutions and industries to adopt new technologies and standards.		UNIDO Official Website
50	International Trade Centre (ITC)	ITC assists food-related businesses in Africa with capacity-building support focused on export development, market intelligence, value chain analysis, and quality management to enhance their competitiveness in international markets.	Focuses on supporting all small and medium-sized enterprises (SMEs) in developing and transitioning economies	lobally with special attention to LDCs, landlocked LDCs, small island developing states (SIDS), sub-Saharan Africa, and other vulnerable economies.	primarily with small and medium-sized enterprises (SMEs).	No information found; seems to operate across value chains to increase trade opportunity for all relevant SMEs	provides market access information, trade and market intelligence, capacity building, technical support, and promotes sustainable and inclusive trade.	Training through the SME Trade Academy, digital tools like SheTrades for women's economic empowerment, and the Green2Compete strategy for supporting MSMEs to adopt green production and trade practices.	Established in 1964	To contribute to sustainable economic development within the frameworks of the United Nations’ Sustainable Development Goals and the global trade system. This includes promoting inclusive and sustainable trade, supporting MSMEs in developing countries to become more competitive in global markets, and ensuring that trade impacts positively on the global economy.	https://intracen.org/file/itcstrategicplan2022-2025pdf	Focus on sustainability and inclusivity, with various tools and programs designed to support MSMEs, women entrepreneurs, and the green economy.	Employs various tools and platforms for monitoring and evaluation, including trade and market intelligence platforms like Trade Map and e-learning platforms like the SME Trade Academy.	varies by project; eg. Initiatives like the SheTrades aim to connect millions of women entrepreneurs to markets.	research highlights the critical role of digitalization, sustainability, and inclusivity in trade for achieving broader economic and social goals	Key factors include the adoption of digital trade technologies, access to finance, policy support for sustainable and inclusive trade practices, and the capacity of MSMEs to meet international market standards.		http://intracen.org/
51	United Nations Conference on Trade and Development (UNCTAD)	UNCTAD provides technical assistance and capacity-building support to food-related businesses in Africa, particularly small and medium-sized enterprises (SMEs), to enhance their participation in regional and international food trade.	wide range of private sector entities, including those involved in Foreign Direct Investment (FDI), the digital economy, creative industries,	Focus on developing countries, least developed countries (LDCs), and economies in transition.	Engages with both small and medium-sized enterprises (SMEs) and large corporations, especially those contributing to FDI and the creative economy.	no information found; does not specifically focus on certain food value chains	policy guidance, capacity-building workshops, and public-private partnerships, focusing on areas such as digital economy, competition and consumer protection, finance and investment, and creative industries	workshops on Public-Private Partnerships (PPPs) in sectors like transport in Zambia, promoting the creative economy as a driver of trade and development, and emphasizing the role of the private sector in achieving the SDG	Established in 1964	To support developing countries in integrating into the global economy in a sustainable manner, with a focus on inclusive and sustainable development.	https://unctad.org/dmfas/system/files/client-area/Strategic_Plan_DMFAS_Programme_2020-2024_final.pdf	multistakeholder approach; engagement involves collaboration with governments, the private sector, and civil society, e			importance of integrating the private sector in sustainable development efforts, the potential of the digital economy, and the creative industries as drivers of economic growth are key themes	need for reform in international investment, the pivotal role of digital technologies, and the essential nature of public-private partnerships are likely factors influencing UNCTAD's initiatives' success		https://unctad.org/
52	United Nations Capital Development Fund (UNCDF)	UNCDF supports inclusive finance initiatives in Africa that benefit food-related businesses, including access to finance, financial literacy training, and capacity-building programs to enhance their financial management skills.	collaborates with a wide array of private sector entities including financial service providers, mobile network operators, domestic banks, pension funds, SMEs, foundations, and various investors to expand the finance reach in local economies	Focus on developing countries and LDCs	broad spectrum of the private sector, ranging from micro-enterprises to large financial institutions and investment funds.	their 'Sustainable Food Sector Finance' program focuses on advancing local food security, production, and diversification. No specific value chains are detailed.	Design, pilot and enhance innovative private or blended finance mechanisms for local food- supply-chain SMEs; Promote digital solutions and innovation for improved access to finance and other services for local producers and value-chain participants (including for climate-smart agriculture)	leveraging digital innovations for financial inclusion, developing data-driven diagnostics for better financial strategy formulation, engaging in policy advocacy for improved local government financing systems, and utilizing capital tools and technical assistance to encourage innovative financial service offerings	Established in 1966	to mobilize and catalyze capital to support LDCs in achieving sustainable growth and inclusiveness as envisioned by the 2030 Agenda for Sustainable Development and the Doha Programme of Action for the Least Developed Countries, 2022–2031.	https://www.uncdf.org/sf2022	hybrid model functioning both as a development organization and a development finance institution, leveraging its unique mandate and financial instruments to support LDCs.	Utilizes data, diagnostics, and analyses to monitor and assess the effectiveness of its interventions	Has significantly contributed to various sectors such as inclusive digital economies, local transformative finance, women's economic empowerment, climate, energy, and biodiversity finance, and sustainable food systems	Emphasizes the importance of leveraging digital innovations for financial inclusion, the critical role of data in shaping financial inclusion strategies, and the necessity of multi-stakeholder partnerships for achieving sustainable development goals			https://www.uncdf.org/foodsystems
53	International Fund for Agricultural Development (IFAD)	IFAD supports rural development projects in Africa, including initiatives aimed at improving agricultural productivity and strengthening food value chains.	Small-scale farmers and rural micro, small and mid-size enterprises (MSMEs).	Lower Income Countries, Lower Middle Income Countries, and countries in fragile situations globally, with a focus on regions where IFAD operates.	Micro, small, and medium.	No specific focus; all value chains can be expected to be supported	Financing directly to operating companies and financial intermediaries serving small farmers, the rural poor, and MSMEs through debt, equity, and risk mitigation instruments.	Direct financial support	IFAD established in 1977; cannot find info on PSFP but seems to have been established circa 2010s	To double IFAD's impact on rural poor communities by 2030, addressing global food security crises through climate-smart agriculture and climate adaptation initiatives, focusing on empowering women and youth.	https://www.ifad.org/en/-/document/private-sector-strategy	Offers financing directly to entities serving small-scale agriculture sectors,	IFAD conducts impact assessments to understand whether changes in the lives of IFAD project participants can be attributed to the project itself. As part of the Development Effectiveness Framework, IFAD conducts impact assessments on at least 15 per cent of its project portfolio, which provide a representative sample of IFAD's overall portfolio.More info here: https://www.ifad.org/en/impact-asses…	Please see impact assessments here: https://www.ifad.org/en/impact-assessment	government support for private-sector development is crucial, and there is a need to leverage all instruments for promoting private-sector engagement more effectively.	IFAD's understanding of rural communities and the agricultural sector, as well as its position to mobilize resources. Challenges include the need for enhanced government support for private-sector development and the effective use of IFAD's instruments for promoting such development.
54	Technoserve	TechnoServe works to strengthen the capacity of food businesses, particularly smallholder farmers and entrepreneurs, by providing business training, market connections, and access to finance.	engages with various sectors, including agriculture, coffee, cashew, entrepreneurship, food processing, and micro-retail.	operates in almost 30 countries across Africa, Latin America, and Asia,	small to medium-sized enterprises, including smallholder farmers and entrepreneurs, aiming to build their capacities and connect them to markets​	Coffee, cashew, food processing, micro-retail	omprehensive support including developing capacity (skills, knowledge, and technology transfer), strengthening market connections (connecting businesses and farms to capital, networks, and suppliers), and improving the business environment (encouraging policies and practices for better market function)​	training on agricultural practices, business training, mentoring, and connecting to market opportunities	1968	aims to reduce poverty by helping build regenerative farms, businesses, and markets that increase incomes,	https://www.technoserve.org/wp-content/uploads/2022/07/Strategic-Plan_20220630_1348-2-3-2.pdf	Works directly with SMEs to improve business metrics	Broadly, they produce an annual impact asessment report; see most recent report here: https://www.technoserve.org/2022-annual-report/	Again, please see impact report here: https://www.technoserve.org/2022-annual-report/	No information found	No information found
55	Partners in Food Solutions (PFS)	PFS connects volunteer experts from the food industry with African food processors and smallholder farmers to provide technical assistance in areas such as food safety, quality control, and processing technology.	works with the food processing sector, collaborating with small and growing food processors in Africa.	Cote D'Ivoire, Ethiopia, Ghana, Kenya, Malawi, Nigeria, Rwanda, Senegal, Tanzania, Uganda, Zimbabwer	Primarily engages with small and growing enterprises within the food processing sector	Not specifically detailed; however, considering the focus on the food processing sector, can imagine that they focus on involvement in areas such as grains, dairy, and other agricultural products that more hevaily involve food-processing	provides support through knowledge transfer and expertise sharing. Corporate volunteers from major food companies collaborate with African food companies to share their expertise, thus improving food security, nutrition, and economic development​	Connecting local SMEs with volunteers from major food processing corporations	1865	aims to strengthen food security, improve nutrition, and foster economic development by enhancing the competitiveness of the African food processing sector​	No information found	Volunteers remotely "give world-class expertise to strengthen companies - from facility design to product development to providing the technical and business know-how - that African food companies need to grow. Strengthening the middle of the value chain has a ripple effect, strengthening markets for smallholder farmers and bring more nutritious food to consumers.	No information found; potentially refer to annual report (next column)	Any information can be found in most recent annual report, https://www.partnersinfoodsolutions.com/2021-annual-report	No information found	success heavily relies on effective knowledge transfer, engagement of local businesses, and the applicability of shared practices to local contexts​		https://www.technoserve.org
56	Farm Africa	Farm Africa focuses on supporting smallholder farmers and rural communities in Africa to increase agricultural productivity, improve food security, and access markets through various technical assistance programs	Engages with smallholder farmers, farm workers, and agro-pastoralists.	Eastern Africa, Ethiopia, Kenya, Tanzania, Uganda, and Democratic Republic of Congo	Engages with micro to small sized enterprises within the agriculutral sector	Agricultural value chains including horticulture, animal husbandry, and aquaculture. Coffee, honey, and other crops	Training, agriculutral practices, business skills development, access to finance, and market linkages	Training in urban agriculture, organic fertilizer production, seeding production, crop cultivation, and post-harvest handling. Offers support for accessing agricultural inputs and technical mentoring services	1985	promote sustainable agricultural practices, protect the environment, and strengthen markets to end rural poverty.	The work is based on the pillars of agriculture, market engagement, and environment, supported by cross-cutting themes like climate action, gender equality, youth employment, resilience, and agri-tech​ (Farm Africa)​.	Collaborates closely with local communities, government bodies, and international donors. Implements projects directly affecting the livelihoods of rural families.	https://www.farmafrica.org/downloads/2021/farm-africa-strategic-plan-2021--2025.pdf	In 2022, Farm Africa reached 718,000 people, significantly increasing household incomes and managing vast areas of land sustainably​ (Farm Africa)​.	Emphasizes the importance of community engagement and the integration of modern agricultural techniques to ensure sustainability and resilience.	Factors supporting progress include strong local partnerships and international funding, while challenges include climate variability and limited access to markets.	Giving circle for farm Africa. Giving circle members invest in farm africa in the knowledge that we support farmers, women, and young people to build prosperous futures for generations	https://www.farmafrica.org/
57	Mercy Corps	Mercy Corps implements various agricultural development programs in Africa, including initiatives that provide technical assistance to food businesses, improve market linkages, and promote sustainable agricultural practices	Mercy Corps engages with a wide array of private sector partners including multinational corporations, local businesses, and social entrepreneurs.	Global engagement, with significant activities in Africa, Americas, Asia, Europe, and the Middle East.	Engages a diverse range of private sector partners from micro-enterprises to large multinational corporations.	Supports agricultural communities in food production, distribution, and sales, focusing on sustainable and resilient agricultural practices.	Provides training, access to financial services, market linkages, and technical assistance to enhance business skills and economic opportunities.	Includes initiatives like digitalizing food voucher programming, supporting farmers with adaptive agricultural methods, and promoting sustainable business practices.	1979	To alleviate suffering, poverty, and oppression by helping people build secure, productive, and just communities.	Focuses on building resilience, promoting sustainable growth, and fostering innovation within vulnerable communities​ (https://www.mercycorps.org/annual-reports/2021)​.	Works in over 40 countries, leveraging a combination of direct interventions, partnerships with local governments and private entities, and community engagement to drive change.	https://www.mercycorps.org/pathway	In 2021, Mercy Corps helped more than 28 million people globally through various programs including health, economic, and emergency reponses (https://www.mercycorps.org/annual-reports/2021).	Emphasizes the importance of local partnerships and adapting interventions to local contexts to enhance effectiveness and sustainability.	Supported by strong global partnerships and diverse funding sources, though hindered by geopolitical instabilities and logistical challenges in conflict zones.	They partnered with Cisco to digitize their food voucher programming.	https://www.mercycorps.org/
58	ACDI/VOCA	ACDI/VOCA implements agricultural development projects in Africa, providing technical assistance and capacity building to smallholder farmers, agribusinesses, and food processors.	Works with multinational companies, large anchor firms, small and growing businesses, financial intermediaries, and investors.	Global, with significant activities in developing countries across Africa, Asia, and Latin America.	Ranges from small to large businesses, including financial institutions and impact investors.	Engages in agricultural value chains, including crops like coffee and general agribusiness sectors.	Provides technical assistance, market access, productivity enhancements, and financial services to foster economic growth and sustainability.	Includes partner identification and engagement, co-creation with the private sector, due diligence assessments, developing meaningful milestones, and partnership health assessments.	1963	Promotes economic opportunities for cooperatives, enterprises, and communities through innovative business practices.	Focuses on catalyzing investment, climate-smart agriculture, empowerment & resilience, institutional strengthening, and market systems	Partners with governments, civil society groups, private companies, and financial institutions in design and execution of programs.	https://www.acdivoca.org/wp-content/uploads/2021/04/Resilience-and-Food-Security-Fact-Sheet.pdf	Known for significant impact in economic growth and community development in various countries.	Emphasizes the importance of adaptive partnerships and locally-driven solutions for sustainable development.	Supported by diverse funding sources and partnerships but may face challenges due to political and economic instability in target regions.	ACDI/VOCA has historically played a significant role in establishing major agricultural cooperatives and institutions such as the Indian Farmers Fertiliser Cooperative (IFFCO), which is India's largest fertilizer company.	https://www.acdivoca.org/
59	One Acre Fund	One Acre Fund provides agricultural training, finance, and market facilitation services to smallholder farmers in Africa, helping them improve their productivity and access to markets.	Engages with smallholder farmers primarily, providing them with resources and training to enhance productivity.	Sub-Saharan Africa including Kenya, Rwanda, Burundi, Tanzania, Uganda, Malawi, Nigeria, Zambia, and Ethiopia.	Primarily engages with micro to small-sized enterprises (individual smallholder farmers).	Involved in various food value chains, primarily staple crops such as maize, but also includes diversified crops like fruits and vegetables.	Provides financial services, high-quality seeds and fertilizers, agricultural training, and market access.	Offers a comprehensive service package that includes loans for farm inputs, training on agricultural best practices, post-harvest support, and facilitation of market access.	2006	To make smallholder farmers more prosperous and end hunger in the areas where they operate.	Employs a market-based approach with a significant focus on increasing farm productivity and profitability through sustainable practices.	Works directly with farmers and also collaborates with governments and other stakeholders to scale its impact.	https://oneacrefund.org/sites/default/files/2023-11/2024-2026%20Strategic%20Plan%20for%20Dutch%20Website.pdf	In 2022, served approximately 4 million farmers, directly and indirectly, helping them achieve significant income growth and improved food security	Emphasizes the importance of adapting services to the specific needs of smallholder farmers to ensure sustainability and significant impact.	Supported by effective model of financial sustainability where a significant portion of its operating costs are covered by farmer repayments. Challenges include vulnerability to external shocks like pandemics which can disrupt supply chains and access to markets​	One Acre Fund has planted over 100 million trees as part of their commitment to environmental sustainability and climate resilience​	https://oneacrefund.org/
60	Self Help Africa	Self Help Africa supports smallholder farmers and rural entrepreneurs in Africa through capacity-building programs that focus on improving agricultural practices, access to markets, and value chain development in the food sector.	Engages with smallholder farmers, cooperatives, and micro-entrepreneurs, focusing on agriculture and enterprise development.	sub-Saharan Africa, including countries like Kenya, Uganda, Ethiopia, Malawi, and others, as well as in Bangladesh and Brazil.	Focuses mainly on micro to small enterprises, particularly individual farmers and small producer groups.	Involved in various agricultural value chains, including crops like maize, sorghum, and a variety of vegetables, focusing on both production and market access.	Provides agricultural training, access to finance through microfinance, market access, gender equality initiatives, and climate resilience strategies.	Offers training in sustainable agriculture practices, nutritional education, and enterprise development; supports gender equality and access to clean water; facilitates cooperative development and access to markets.	1984	To alleviate hunger, poverty, and social inequality through community-led, market-based, and enterprise-focused approaches to agricultural and economic development.	Aims to transition communities out of poverty by providing tools and resources for sustainable agriculture and business practices​	Works with local staff and partners to implement programs; focuses on integrating sustainable development goals into its operations.	https://selfhelpafrica.org/ie/strategy2023-2027/#:~:text=SELF%20HELP%20AFRICA'S%20NEW%20GLOBAL%20STRATEGY%20(2023%2D2027)&text=We%20will%20seek%20to%20ensure,contexts%20through%20to%20emerging%20economies.	Has significantly increased food security and incomes among the communities it works with, through agricultural and business training.	Recognizes the importance of gender equality and sustainable practices for successful agricultural development.	Supported by a variety of international donors and partnerships; challenges include climate change impacts and local economic conditions.	Self Help Africa has a significant focus on gender equality, recognizing that women farmers own only a small fraction of agricultural land in Africa, which impacts their access to resources and training.	https://www.selfhelpafrica.org/
61	Helen Keller International (HKI)	HKI collaborates with food businesses in Africa to promote nutrition-sensitive agriculture and food systems. They provide technical assistance on integrating nutrient-rich crops into food production and distribution chains, as well as nutrition education and behavior change communication strategies.	Works with healthcare providers, agricultural businesses, and nutritional supplement manufacturers.	20 countries across Asia, Africa, Europe, and the United States.	Engages with a variety of sizes from small local producers to larger healthcare providers and multinational corporations involved in nutritional supplements and agricultural development.	Involved in food systems that include agricultural production (e.g., home gardens, chicken raising), food processing, and marketing to improve nutritional outcomes and economic benefits for families.	Provides technical assistance, research collaboration, and development programs that enhance food and health systems.	Includes training in nutritional practices, agricultural development, distribution of supplements like Vitamin A, and strengthening healthcare services through various interventions.	1915	To save the sight and lives of the most vulnerable and disadvantaged; to ensure all individuals have the opportunity to live a healthy life and reach their full potential.	Focuses on overcoming inequities in health and food systems to ensure good health, nutrition, and the potential for self-sufficiency	Collaborates with governments, private sector partners, and communities; utilizes a systemic approach to integrate improvements into existing structures.	https://helenkellerintl.org/hunger-strategy/	Annually reaches millions of people worldwide with interventions that improve nutrition, health, and food security.	Emphasizes the importance of system-based approaches and the central role of women in driving community health and economic stability.	Supported by a strong network of global partnerships and evidence-based approaches; challenges include local political and economic instability that may affect program delivery.	HKI’s efforts in Vitamin A supplementation have been a critical part of their strategy to prevent blindness and save lives, particularly among children and mothers in developing countries.	https://helenkellerintl.org/
62	Sight and Life	Sight and Life partners with food businesses in Africa to address malnutrition and improve nutrition outcomes. They offer technical assistance on product development, fortification, and marketing strategies that prioritize nutrition and health.	Works primarily with food and nutrition companies, including those involved in the production and distribution of fortified foods and nutritional supplements.	Global focus, with significant activities in low and middle-income countries where malnutrition is prevalent.	Engages with a range of enterprises from small to large, including multinational corporations.	Involved in nutritional food products, particularly those aimed at improving micronutrient intake (e.g., fortified foods).	Provides research, technical assistance, and advocacy to enhance the nutritional quality of food products.	Includes development of new fortification technologies, support for regulatory compliance, and improvement of food chain efficiencies to enhance nutritional impact.	1986	To eliminate malnutrition and hidden hunger in vulnerable populations through improved nutrition.	Focuses on innovation in nutrition, evidence generation, and advocacy to influence nutrition policy and practice.	Collaborates with academia, NGOs, governments, and the private sector to foster scalable nutrition solutions.	https://sightandlife.org/our-work/our-strategy	Has been instrumental in advancing micronutrient research and the global agenda on food fortification and biofortification.	Highlights the importance of cross-sector collaboration and the integration of scientific research into program design for sustainable impact.	Progress is supported by partnerships and technological innovation but hindered by regulatory challenges and the need for greater public awareness and policy support.	Sight and Life was instrumental in pioneering the concept of "Nutrition Agora," a platform designed to foster dialogues and collaborations across various sectors to scale nutrition innovations.	https://sightandlife.org/
63	HarvestPlus	HarvestPlus works with food businesses in Africa to promote biofortification, a process of breeding crops with enhanced nutritional content. They provide technical assistance on incorporating biofortified crops into food products and supply chains to address micronutrient deficiencies.	Engages with agricultural enterprises, seed companies, food producers, and distributors.	Africa, Asia, and Latin America.	Collaborates with a variety of business sizes, from smallholder farmers to large agricultural corporations.	Involved in the value chains of biofortified crops such as maize, beans, rice, and wheat which are rich in vitamins and minerals.	Offers technical support, research collaboration, and market development assistance to promote biofortified crops.	Provides agronomic training, access to high-quality biofortified seeds, assistance in meeting regulatory standards, and support in accessing markets.	2003	To improve nutrition globally through biofortified crops that enhance the micronutrient intake of populations at risk of malnutrition.	Utilizes biofortification to increase the nutritional value of staple crops, with a focus on iron, zinc, and vitamin A.	Works through partnerships with international organizations, local governments, NGOs, and the private sector to scale up the adoption and consumption of biofortified crops.	https://www.harvestplus.org/home/mission-strategy/	Over 100 million people in farming households are consuming biofortified crops due to HarvestPlus’s efforts.	The importance of integrating biofortification with other nutrition strategies and the need for strong local partnerships to ensure sustainability and reach.	Supported by global partnerships and the scientific validation of biofortification; challenges include variable adoption rates across regions and the need for greater consumer awareness.	HarvestPlus's work in biofortification earned its founders the World Food Prize in 2016, recognizing their significant contribution to improving the nutrition and public health through agricultural innovation.	https://www.harvestplus.org/
64	Catholic Relief Services (CRS)	CRS works with food businesses in Africa to address malnutrition and food insecurity. They provide technical assistance on agricultural practices, post-harvest handling, and market access strategies that contribute to improved nutrition outcomes.	Works with agribusinesses, microfinance institutions, and small to medium enterprises (SMEs) involved in various sectors including agriculture, water and sanitation, and health.	Africa, Asia, Latin America, and Eastern Europe.	Collaborates with a range of business sizes from micro to large, depending on the project and local context.	Involved in agricultural value chains including crops such as maize, beans, and other staples; supports sustainable agricultural practices and market access for smallholder farmers.	Offers technical assistance, capacity building, market access facilitation, and partnerships for innovation and scaling up business operations.	Includes training in sustainable farming practices, financial literacy, business development services, and linking farmers to markets and digital platforms for better market access.	1943	To assist impoverished and disadvantaged people overseas, promoting human dignity and advocating for better standards of living.	Focuses on humanitarian aid, sustainable development, and promoting justice in communities, aligning with Catholic social teachings. More details can be found on their website or annual reports.	Works through partnerships with local NGOs, government bodies, and private sector stakeholders, often within comprehensive development programs.	https://www.crs.org/sites/default/files/usops-resources/181129_crs_strategy_rev_062519_a.pdf	CRS programs reach millions globally, significantly improving conditions for the poor through various initiatives in sectors like agriculture, health, and emergency response.	Emphasizes the importance of community engagement and local partnerships for sustainable impact. Recognizes the need for adaptable program strategies in diverse socio-political contexts.	Supported by a strong network of global donors and partnerships; challenges include political instability in some regions and navigating diverse regulatory environments.	CRS initiated the CRS Rice Bowl, a Lenten program started in 1977, which is now a tradition involving millions of participants worldwide, aiming to provide food and support to those in need through simple meals and donations.	https://www.crs.org/
65	Land O'Lakes Venture37	Land O'Lakes Venture37 collaborates with food businesses in Africa to promote nutrition-sensitive agriculture and food systems. They provide technical assistance on sustainable farming practices, value chain development, and nutrition education initiatives.	Collaborates with agribusinesses, dairy cooperatives, horticulture enterprises, livestock producers, and agricultural technology providers.	Africa, Asia, and Eastern Europe including countries like Rwanda, Malawi, Kenya, Ethiopia, and Georgia.	Engages with a range of business sizes, primarily focusing on small to medium enterprises (SMEs) involved in agriculture.	Involved in diverse food value chains including dairy, horticulture, livestock, and crops, aiming to enhance productivity, market access, and sustainability.	Provides technical assistance, market development, access to innovative agricultural technologies, capacity building, and financial services.	Includes agricultural training, promotion of climate-smart practices, strengthening of supply chains, and facilitation of access to financial products and markets.	1981	To empower communities and strengthen economies through sustainable agricultural practices and effective market systems.	None found	Collaborates with a variety of stakeholders including local governments, international agencies, NGOs, and private sector partners to implement its projects.	Utilizes data-driven and evidence-based approaches to measure the effectiveness of its interventions and adapt strategies accordingly.	Has successfully implemented agricultural development projects that have improved the livelihoods and food security of communities in multiple countries.	Highlights the importance of local partnerships and market-driven approaches in achieving sustainable agricultural development.	Progress is facilitated by strong partnerships and innovative approaches; however, challenges include adapting to diverse agricultural contexts and managing risks related to climate change.	Land O'Lakes Venture37 leverages the extensive agricultural expertise and resources of its parent company, Land O'Lakes, Inc., one of the largest farmer-owned cooperatives in the United States, to implement effective and sustainable agricultural solutions globally.	https://www.landolakesventure37.org/
66	Action Against Hunger	Action Against Hunger partners with food businesses in Africa to address malnutrition through nutrition-sensitive programming. They provide technical assistance on nutrition-sensitive agriculture, food security interventions, and community-based nutrition programs.	Collaborates with agricultural businesses, food and beverage companies, and nutritional product manufacturers.	Africa, Asia, the Americas, and the Middle East.	Partners with a range of sizes, from small local businesses to large international corporations.	Involved in diverse food value chains including nutrition-sensitive agriculture, food production, and distribution networks focused on improving food security and nutritional outcomes.	Offers technical assistance, advocacy for improved food policies, capacity building, and supports innovations in nutrition and food security.	Includes nutritional education programs, food safety training, support for sustainable farming practices, and the development of digital tools to improve agricultural productivity.	1979	To end world hunger and ensure access to safe water and sustainable solutions to hunger for all.	https://www.actionagainsthunger.org.uk/publications-and-reports/international-strategic-plan-2021-2025	Works through partnerships with local communities, private sector entities, and international organizations to implement its programs.	Implements rigorous monitoring and evaluation to assess the effectiveness and impact of its interventions on reducing hunger and improving nutritional outcomes.	Reaches millions of people annually with its programs aimed at preventing and treating malnutrition and improving food security.	Emphasizes the importance of integrating nutrition in all aspects of food security programs and the need for strong local partnerships.	Progress is supported by its global network and effective advocacy, though hindered by ongoing conflicts and climate challenges in many regions.	Action Against Hunger was a pioneer in using the MUAC (Mid-Upper Arm Circumference) band, a simple yet effective tool for early detection of malnutrition in children, which has become a standard tool used globally in malnutrition screening programs.	https://www.actionagainsthunger.org/
67	International Rescue Committee (IRC)	IRC collaborates with food retailers in Africa to enhance their capacity in supply chain management, pricing strategies, and customer service. They provide technical assistance to help retailers adapt to market dynamics and increase their resilience.	Collaborates with corporations across various sectors including healthcare, technology, and consumer goods to improve the efficacy of its humanitarian responses.	over 50 countries across Africa, Asia, Europe, the Middle East, and the Americas.	Engages with a range of business sizes, from small enterprises to multinational corporations.	Involved in improving food security through agricultural initiatives, nutritional programs, and emergency food aid.	Offers partnerships that help companies achieve their corporate social responsibility goals, including employee engagement, matching gifts, and cause-related marketing.	Provides expertise in crisis response, enhances supply chain logistics in humanitarian settings, and offers employee engagement opportunities for skill-building and volunteering.	1933	To respond to the world’s worst humanitarian crises and help people whose lives and livelihoods are shattered by conflict and disaster to survive, recover, and gain control over their futures.	https://www.rescue.org/resource/irc-strategy100	Works through direct interventions, partnerships with local NGOs, governments, and private sector entities, and leverages its vast volunteer network for effective response.	Employs a robust monitoring and evaluation system to assess the effectiveness of its interventions and to continually improve its program strategies based on evidence and research.	Assists millions of individuals each year through programs that provide health care, infrastructure, education, and economic opportunities.	Stresses the importance of community engagement and the integration of services to meet the diverse needs of affected populations efficiently.	Progress is supported by global partnerships and the flexibility to adapt to crisis situations; challenges include navigating complex political environments and ensuring sustainable funding.	The IRC was initially formed at the request of Albert Einstein to assist opponents of Adolf Hitler, demonstrating a longstanding commitment to human rights and refugee assistance.	https://www.rescue.org/
68	Bill & Melinda Gates Foundation	The Gates Foundation supports initiatives aimed at improving agricultural productivity, enhancing market access, and strengthening supply chains in Africa through investments in research, technology adoption, and capacity-building programs for private sector actors.	Collaborates extensively with biotechnology companies, pharmaceutical companies, agriculture businesses, and technology firms.	Operates globally, with significant activities in sub-Saharan Africa, South Asia, and the United States.	Partners with a range of business sizes from startups to large multinational corporations.	Involved in nutritional improvements through agriculture with a focus on fortifying commonly consumed foods and developing biofortified crops.	Provides funding, research support, and advocacy efforts to improve health and development outcomes. This includes investments in innovation and technology to enhance agricultural productivity and food security.	Supports fortification of staple foods, development of new agricultural techniques, and improvement of food systems. Invests in health interventions that prevent and treat diseases affecting vulnerable populations.	2000	To enhance healthcare, reduce extreme poverty, and expand educational opportunities and access to information technology.	https://gatesfamilyfoundation.org/2022-strategic-plan-webinars/	Engages through direct partnerships, grants, and collaborative projects with various stakeholders including NGOs, governments, and other philanthropic entities.	Utilizes rigorous monitoring and evaluation processes to measure the effectiveness of its initiatives and to inform future strategies.	Has committed billions of dollars in grants and support across its various programs, significantly impacting global health, education, and economic development.	Recognizes the importance of collaboration across sectors and regions to address complex global challenges effectively.	Progress is facilitated by substantial financial resources and global partnerships. Challenges include the complexity of scaling interventions globally and ensuring sustainable impacts.	The foundation has pledged to spend all of its resources within 20 years after its founders' deaths, reflecting its philosophy of making high-impact investments to address some of the world’s most pressing problems in the present.	https://www.gatesfoundation.org/
69	Mastercard Foundation	The Mastercard Foundation focuses on promoting youth entrepreneurship and economic opportunities in Africa, including initiatives that support small and medium-sized enterprises (SMEs) operating in food markets through capacity-building programs and access to finance.	Works with financial institutions, agribusinesses, education providers, and technology firms to increase financial inclusion and support education and agricultural development.	Focuses primarily on Africa, with significant activities across Sub-Saharan Africa and specific programs targeting Indigenous communities in Canada.	Partners with businesses of various sizes, from small and medium enterprises (SMEs) to large corporations, particularly those that can scale innovative solutions.	Engaged in various parts of the agriculture value chain including primary production, processing, trading, and market linkages with a focus on enhancing the agricultural sector's efficiency and productivity.	Provides grants, technical assistance, and funding for innovative projects that drive financial inclusion and support sustainable economic development.	Includes funding and support for enhancing agricultural productivity, financial inclusion through technology solutions, and skills development in the private sector.	2006	To advance learning and promote financial inclusion to catalyze prosperity in developing countries, focusing on enabling young people and women to obtain dignified and fulfilling work.	https://mastercardfdn.org/wp-content/uploads/2020/09/Mastercard-Foundation-Impact-Strategy-2021.pdf	Works through partnerships with local governments, NGOs, businesses, and educational institutions to implement its initiatives.	Uses evidence-based strategies to monitor and evaluate the impact of its programs, aiming to adapt and scale successful interventions.	Has significantly contributed to improving financial inclusion and supporting economic development in Africa and among Indigenous populations in Canada.	Emphasizes the importance of partnership and local engagement for sustainable impact and the integration of financial services with educational and economic opportunities.	Progress is facilitated by robust partnerships and the integration of digital solutions; challenges include navigating diverse regulatory environments and ensuring the sustainability of initiatives.	The Mastercard Foundation hosts the Baobab Summit, a significant event that gathers young leaders from Africa to discuss and drive transformative change in their communities, reflecting the foundation's commitment to empowering youth leadership.	https://mastercardfdn.org/
70	Tony Elumelu Foundation	The Tony Elumelu Foundation supports entrepreneurship and business development across Africa through its flagship Tony Elumelu Entrepreneurship Program. It provides training, mentoring, and access to funding for entrepreneurs, including those involved in the food sector.	Works primarily with young entrepreneurs and startups across various sectors including agriculture, technology, healthcare, and more.	Africa, with activities across all 54 African countries.	Primarily supports micro, small, and medium enterprises (SMEs) through entrepreneurship development.	Engaged in agricultural sectors, supporting entrepreneurs involved in primary production, processing, trading, and market linkages.	Offers training, mentoring, and non-returnable seed capital. Provides a platform for networking and further financial opportunities.	Includes entrepreneurship training, seed capital funding, mentoring from business and development experts, and access to a network of investors for further funding opportunities.	2010	To empower African entrepreneurs and the private sector to contribute to economic growth and poverty eradication across the continent.	https://www.tonyelumelufoundation.org/wp-content/uploads/2023/06/TEF-CORPORATE-PROFILE-2023.pdf	Engages through its Entrepreneurship Programme, which is designed to empower 10,000 entrepreneurs over 10 years with a commitment of $100 million.	Tracks the progress and impact of its entrepreneurs through business growth metrics, job creation, and economic impact.	Has trained over 1.5 million young Africans, funded 19,016 entrepreneurs, and helped create hundreds of thousands of jobs.	Stresses the importance of local capacity building and the need for sustainable economic growth through entrepreneurship.	Progress is supported by strong partnerships and a widespread network across Africa. Challenges include navigating diverse economic landscapes and ensuring sustainable business models among startups.	The Tony Elumelu Foundation is notable for its significant commitment to empowering African entrepreneurship, marking one of the largest philanthropic efforts in African development, led by an African.	https://www.tonyelumelufoundation.org/
71	Cargill Foundation	The Cargill Foundation supports initiatives that promote food security, nutrition, and sustainable agriculture in Africa. It provides capacity-building support to smallholder farmers, cooperatives, and food businesses to enhance their productivity and market competitiveness.	Primarily works with agricultural businesses, food producers, and food supply chain companies.	Focuses on local communities around its global operations, particularly in the Minneapolis-Saint Paul area in Minnesota, where it has strong community involvement, but also has a global outreach.	Engages with a range of businesses from small farmers to large agribusinesses.	Involved in various parts of the food value chain, including agriculture, food production, processing, and distribution.	Provides grants and support for sustainable agriculture practices, nutritional programs, and food security initiatives.	Support includes funding for sustainable farming techniques, improvements in food supply chain efficiency, and initiatives to reduce food waste.	1865	To nourish and educate the next generation, ensuring success in school, work, and life by supporting nutritional and educational programs.	https://www.macphilanthropies.org/wp-content/uploads/2022/11/MACP_Annual_Report_2021.pdf	Collaborates with local communities, non-profit organizations, and other stakeholders to implement programs that align with its goals.	Employs monitoring and evaluation practices to assess the impact of its initiatives and ensure they meet community needs effectively.	Has made significant contributions to community welfare through its focus on nutrition and education, particularly in its headquarters community.	Emphasizes the importance of community-based approaches and partnerships to effectively address local needs.	Supported by Cargill’s global presence and resources; however, challenges may include aligning corporate goals with community needs and ensuring sustainable impacts.	The Cargill Foundation's commitment to local community support is exemplified by its strategic focus on the Minneapolis-Saint Paul area, aiming to address the Opportunity Gap for low-income children through targeted nutritional and educational programs.	https://www.cargill.com/about/community/cargill-foundation-headquarters
72	Ford Foundation	The Ford Foundation invests in initiatives that promote social justice and economic development in Africa, including programs that support small and medium-sized enterprises (SMEs) operating in food markets through capacity-building and access to finance.	Works primarily with nonprofits, academic institutions, and community organizations, but also engages with private sector entities in areas like impact investing and sustainable development.	Global reach, with significant activities in the United States and worldwide engagements, particularly in regions like Africa, Latin America, and Asia.	Engages with a wide range of organizations, from small community-based groups to large multinational corporations, depending on the initiative.	While not a primary focus, supports initiatives that involve sustainable agriculture and community food systems as part of broader social justice and economic development programs.	Provides grants and funding for research, capacity building, and program development focused on reducing poverty and injustice.	Includes funding for sustainable development projects, support for policy advocacy, education, and initiatives that aim to increase transparency and inclusivity within economic systems.	1936	To advance human welfare, focusing on social justice, reducing inequality, and promoting community engagement and culture.	https://www.fordfoundation.org/our-work-around-the-world/middle-east-and-north-africa/strategy/	Collaborates with various stakeholders including grantees, government agencies, other foundations, and the private sector to create scalable impact.	Utilizes a comprehensive monitoring and evaluation framework to assess the impact and effectiveness of its grants and interventions.	Has been instrumental in various major social movements and initiatives, providing substantial funding and support that have led to significant changes in policy and practice on a global scale.	Emphasizes the importance of listening to communities and adapting strategies that are contextually relevant and sustainable.	Supported by a substantial endowment and a global network; however, challenges include addressing complex, systemic issues that require long-term, multifaceted approaches.	The Ford Foundation was a pioneer in global philanthropy and has played a crucial role in many progressive initiatives worldwide, including the Green Revolution and the establishment of landmark public policies and human rights standards.	https://www.fordfoundation.org/
73	Syngenta Foundation for Sustainable Agriculture	The Syngenta Foundation supports sustainable agriculture and rural development initiatives in Africa. It provides capacity-building support to smallholder farmers, agribusinesses, and rural entrepreneurs to improve productivity, resilience, and market access.	Works primarily with smallholder farmers, agribusinesses, and agricultural entrepreneurs, especially those in semi-arid areas or with pre-commercial potential.	Focuses on regions in Africa, Asia, and Latin America, with specific projects tailored to local agricultural conditions and needs.	Engages mainly with micro to small enterprises, particularly smallholder farmers and emerging agricultural entrepreneurs.	Involved in various agricultural value chains, focusing on improving productivity and linking farmers to remunerative markets. Key areas include crop production, agro-input supplies, and sustainable farming practices.	Offers technical assistance, access to finance, agricultural insurance solutions, and market access initiatives to enhance the resilience and productivity of smallholder farmers.	Includes development and dissemination of climate-resilient crop varieties, provision of agro-services, risk management tools like agricultural insurance, and innovations in smallholder finance.	2001	Aims to create sustainable farmer-led agricultural development leading to increased productivity, enhanced livelihoods, and reduced poverty among smallholder farmers.	https://www.syngentafoundation.org/strategic-framework#:~:text=Our%20Strategy,-The%20operational%20strategy&text=Our%20aim%20is%20to%20help,and%20sustainably%20improves%20food%20security.	Works through partnerships with local and international organizations, leveraging public and private sector collaborations to scale impact.	Employs rigorous monitoring and evaluation practices to assess the effectiveness of its interventions and adjust strategies based on data-driven insights.	Has engaged thousands of farmers, establishing value chains for new and traditional crops, significantly improving farm incomes and food security.	Highlights the importance of adapting interventions to specific local contexts and the need for continuous innovation to address evolving agricultural challenges.	Supported by strong partnerships and innovative approaches; challenges include dealing with climate variability, market access limitations, and the need for sustained investment in agriculture.	The Syngenta Foundation actively supports the development of "Seed2B" ventures, which focus on bringing agricultural innovations from the lab to the farm, and has been instrumental in developing new agricultural insurance products to protect smallholder farmers against climate risks.	https://www.syngentafoundation.org/
74	Foundation for Food and Agriculture Research (FFAR)	FFAR funds research and innovation projects aimed at addressing food and agriculture challenges globally, including in Africa. It supports capacity-building initiatives for private sector actors involved in food production, processing, and distribution.	Collaborates with agricultural businesses, food producers, and technology companies focused on innovations in agriculture and food systems.	Engages with partners primarily in the United States but also collaborates globally on various agricultural research initiatives.	Partners with a range of businesses from startups and SMEs to large corporations, particularly those involved in agricultural innovation.	Involved in multiple aspects of the food value chain including crop production, food processing, distribution, and sustainable agricultural practices.	Provides funding, research support, and facilitates public-private partnerships aimed at solving critical food and agriculture challenges through innovation.	Includes grants for research on sustainable farming methods, development of new crop varieties, improvements in animal health, and innovations in food processing and safety.	2014	To build unique partnerships to support innovative science addressing today’s food and agricultural challenges.	https://foundationfar.org/wp-content/uploads/2020/11/FFARStrategicPlan4Printer.pdf	Engages through funding consortia that include universities, industry, and non-profit organizations, aiming to leverage public and private resources effectively.	Uses comprehensive monitoring and evaluation strategies to measure the impact and effectiveness of funded research and innovations.	Has funded numerous research initiatives that have led to advancements in agricultural practices, contributing to sustainability and food security.	Highlights the importance of collaborative research and the integration of multidisciplinary approaches to address complex challenges in agriculture.	Progress is supported by robust funding and diverse partnerships. Challenges include aligning various stakeholder interests and adapting research findings to practical, scalable solutions.	FFAR’s unique funding model requires matching funds from non-federal sources, doubling the impact of its investment and encouraging collaboration between government, private sector, and non-profit entities.	https://foundationfar.org/
75	African Agricultural Technology Foundation (AATF)	ATF facilitates partnerships between the public and private sectors to provide access to innovative agricultural technologies that enhance productivity and profitability for businesses in food markets.	Collaborates with agricultural technology firms, seed companies, and agribusinesses focusing on innovative agricultural solutions.	Primarily active in Sub-Saharan Africa, working in multiple countries across the region.	Engages with a range of business sizes from small startups to large enterprises within the agricultural sector.	Involved in various aspects of the agricultural value chain, including crop production, seed supply, agrichemicals, and agricultural biotechnology.	Provides access to new technologies and innovations in agriculture, such as improved seed varieties and farming practices that increase productivity and sustainability.	Includes facilitating access to technology, supporting regulatory and policy development, providing technical expertise, and aiding in the commercialization of agricultural innovations.	2003	To enhance agricultural productivity and food security in Africa through agricultural innovation and technology.	https://www.aatf-africa.org/our-strategy/#:~:text=Our%20Strategy%202023%20%2D%202027&text=In%20the%20two%20decades%20since,and%20reduce%20hunger%20and%20poverty.	Works through partnerships with governments, private sector entities, and other stakeholders to develop and deploy agricultural technologies that can reach a broad base of African farmers.	Employs a robust monitoring and evaluation system to track the effectiveness and impact of its programs on agricultural productivity and sustainability.	Has significantly contributed to agricultural development in Africa through the introduction and adoption of new agricultural technologies and practices.	Highlights the critical role of technology in transforming agriculture and the importance of partnerships in scaling up innovations.	Progress is supported by strong partnerships and innovative technologies; challenges include the adaptation of technologies to local contexts and the need for supportive regulatory environments.	The AATF has been instrumental in the Water Efficient Maize for Africa (WEMA) project, which develops drought-tolerant and insect-resistant maize, helping millions of farmers across several African countries cope with the challenges of climate change.	https://www.aatf-africa.org/
76	Africa Harvest Biotech Foundation International	Africa Harvest Biotech Foundation International focuses on promoting biotechnology solutions for agriculture, including crops relevant to food markets in Africa, and provides technical assistance to businesses in adopting and implementing these technologies.	Works with agricultural biotechnology companies, seed producers, and agribusinesses involved in genetically modified crops and other biotechnological advancements in agriculture.	Primarily operates in Africa, with significant activities in East, West, and Southern Africa.	Engages with a range of sizes, from small-scale farmers to larger agribusiness entities.	Involved in various segments of the food value chain, especially in the development and dissemination of genetically modified crops like sorghum that are designed to improve food security and nutritional outcomes.	Provides technological support, capacity building, and advocacy for the adoption of agricultural biotechnology to improve crop yields and resistance to pests and diseases.	Includes training on new agricultural technologies, support for regulatory compliance, development of new crop varieties, and initiatives to improve market access for biotech crops.	2002	To enhance food security and reduce poverty through sustainable agricultural biotechnology solutions.	https://africaharvest.org/strategic-plan-2023-2027/	Collaborates with various stakeholders including research institutions, government agencies, and the private sector to implement its programs.	Employs monitoring and evaluation mechanisms to assess the effectiveness of its interventions and guide future projects.	Has been instrumental in introducing biotechnological innovations in agriculture, significantly impacting the livelihoods of farmers through enhanced crop productivity and sustainability.	Highlights the importance of integrating traditional agricultural practices with modern biotechnology to ensure cultural acceptance and sustainable adoption.	Progress is facilitated by partnerships with international donors and African governments; challenges include public skepticism about genetically modified crops and varying regulatory environments across countries.	The founder, Dr. Florence Muringi Wambugu, is a renowned advocate for biotechnology and has been pivotal in pioneering biotechnological agricultural advances in Africa, particularly through the development of tissue culture bananas and genetically modified sorghum.	https://www.africaharvest.org/
77	Omidyar Network	Omidyar Network invests in initiatives that promote entrepreneurship and economic development in Africa, including capacity-building programs for businesses operating in food markets. It focuses on supporting innovative solutions that address challenges related to food security and agricultural sustainability.	Engages with startups, entrepreneurs, and organizations working on innovative solutions across various sectors including technology, finance, and media.	Has a global focus, with significant activities in the United States, India, and other parts of the world.	Partners with a variety of entities from small startups to large organizations.	While not specifically focused on food value chains, their investments impact sectors like agriculture through technological innovations and financial inclusion projects that indirectly support agricultural and food markets.	Provides funding, resources, and support for innovations that tackle significant social challenges through a hybrid model combining philanthropic grants and impact investing.	Includes grants, equity investments, and strategic support to foster entrepreneurship and innovation. Focus areas include reimagining capitalism, responsible technology, and building inclusive and equitable societies.	2004	To improve social conditions and encourage innovative solutions that address fundamental challenges affecting societies globally.	https://omidyar.com/building-worker-power-our-updated-strategy-learnings/	Utilizes a flexible capital approach to combine philanthropic grants with investments in for-profit entities to maximize impact across its focus areas.	Implements a comprehensive monitoring and evaluation strategy to assess the impact of its investments and grants.	Has facilitated transformative change across various sectors, supporting numerous organizations and initiatives that strive for social impact.	Emphasizes the importance of flexible, risk-tolerant capital to support innovative solutions that can lead to systemic change.	Supported by a significant endowment and a flexible investment approach; challenges include navigating the complexities of varying global markets and regulatory environments.	The Omidyar Network's unique structure as a hybrid of philanthropic foundation and investment firm allows it to address issues through a combination of tools	https://omidyar.com/
78	Eastern Africa Farmers Federation (EAFF)	EAFF provides technical assistance to farmers' organizations and agribusinesses in Eastern Africa to strengthen their capacity in production, marketing, and advocacy within food markets.	Works primarily with small-scale farmers, agricultural cooperatives, and agribusinesses in the agricultural sector.	Eastern Africa, including Kenya, Uganda, Tanzania, Rwanda, Burundi, and more.	Primarily engages with micro and small enterprises, specifically targeting smallholder farmers and local agricultural cooperatives.	Involved in various agricultural value chains, focusing on crops like maize, rice, and vegetables. EAFF supports initiatives that enhance production, processing, and market access.	Provides advocacy for farmer-friendly policies, capacity building, access to markets, and facilitation of trade among member states.	Includes training in agricultural best practices, lobbying for improved agricultural policies, promoting regional trade, and facilitating access to agricultural inputs and technology.	2001	To represent, lobby, and advocate for the interests of farmers in Eastern Africa, enhance food security, and improve the livelihoods of agricultural communities through effective policy engagement.	https://www.eaffu.org/wp-content/uploads/2024/03/SUPPORTING-NEEDS-Based.pdf	Operates through national chapters in member countries, working directly with farmers' groups and agricultural stakeholders at local and regional levels.	Employs monitoring and evaluation practices to assess the impact of its programs and initiatives on improving agricultural productivity and trade.	Has significantly contributed to the improvement of agricultural policies, increased market access for farmers, and enhanced agricultural practices across its member states.	Emphasizes the importance of regional collaboration and policy advocacy in enhancing agricultural productivity and trade in Eastern Africa.	: Progress is supported by strong regional cooperation and partnerships with various agricultural stakeholders; challenges include varying national agricultural policies and market access barriers.	The EAFF was instrumental in forming the first commodity exchange in East Africa, providing a structured trading environment for agricultural products, which has been a significant step towards stabilizing market access and prices for smallholder farmers.	https://www.eaffu.org/
79	West Africa Agricultural Productivity Program (WAAPP)	WAAPP supports agricultural research and development initiatives in West Africa, providing technical assistance to businesses in the food sector to enhance productivity, value addition, and market access.	Works with agricultural researchers, smallholder farmers, and agribusinesses involved in crop and livestock production.	Operates across 15 member countries of the Economic Community of West African States (ECOWAS).	Engages primarily with small to medium enterprises (SMEs), focusing on smallholder farmers and local agricultural cooperatives.	Involved in the entire food value chain from production to market with a strong emphasis on sustainable and innovative agricultural practices.	Provides support through technology transfer, capacity building, and research dissemination aimed at improving agricultural productivity and sustainability.	Includes the development and dissemination of improved agricultural technologies such as high-yield crop varieties, pest management solutions, and sustainable farming techniques.	2008	To increase agricultural productivity and food security in West Africa through collaborative research, technology dissemination, and capacity building.	https://www.asti.cgiar.org/sites/default/files/pdf/WAAPP-Report-En2017.pdf	Works through national centers of specialization in member countries, coordinating regional efforts to maximize the impact of agricultural innovations.	Utilizes a robust monitoring and evaluation system to assess the impact of interventions on agricultural productivity and regional food security.	Has significantly increased agricultural productivity and incomes across participating countries, benefiting millions of smallholder farmers.	Emphasizes the importance of regional collaboration and the effective transfer of research and technologies to farmers.	Progress is supported by strong regional cooperation and funding from international donors like the World Bank; challenges include variability in national agricultural policies and the need for more consistent funding.	The WAAPP has been pivotal in creating a unified agricultural research system across West Africa, allowing for the shared development and dissemination of technologies that address the specific agricultural challenges of the region.	https://www.waapp-ppaao.org/
80	Centre for Agricultural and Rural Cooperation (CTA)	CTA supports agricultural entrepreneurship and agribusiness development in Africa through capacity-building programs, knowledge sharing, and networking opportunities for businesses in food markets.	Works primarily with agricultural enterprises, tech startups in agri-tech, and smallholder farmers across various sectors.	Focuses on countries within the African, Caribbean, and Pacific (ACP) Group of States.	Engages with a range of sizes, predominantly targeting micro, small, and medium-sized enterprises (SMEs) involved in agriculture.	Involved in enhancing various agricultural value chains, including crops like fruits and vegetables, by improving access to market information, agricultural inputs, and technology.	Provides capacity building, access to information and technology, support for innovation through agri-tech solutions, and advocacy for policy development.	Includes training in modern agricultural practices, promotion of digital tools for farming efficiency, support for market access, and initiatives to improve food security and resilience against climate impacts.	1983	To strengthen food and nutritional security, enhance prosperity, and encourage sound natural resource management in ACP countries.	none found	Works through partnerships with local and international organizations, including governmental bodies, to implement programs that support agricultural development.	Employs monitoring and evaluation techniques to assess the effectiveness and impact of its initiatives, ensuring alignment with strategic goals and outcomes.	Has significantly contributed to the advancement of agricultural productivity and sustainability through various innovative and technological solutions.	Emphasizes the importance of integrating technology with traditional agricultural practices and the need for strong policy frameworks to support agricultural transformations.	Progress is supported by international partnerships and EU funding, with challenges including adapting to rapidly changing technology landscapes and ensuring the sustainability of funded projects.	The CTA has played a crucial role in the digital transformation of agriculture in the ACP regions, pioneering numerous initiatives that leverage ICT to improve agricultural productivity and market access for smallholder farmers.	https://www.cta.int/
81	International Center for Tropical Agriculture (CIAT)	CIAT collaborates with partners in Africa to promote sustainable agriculture and food systems through research, training, and capacity-building initiatives that support private sector actors in adapting to market demands and climate change challenges	Collaborates with agricultural businesses, agro-tech companies, and smallholder farmers, focusing on innovations in agriculture and sustainable practices.	Operates globally, with significant activities in tropical and subtropical regions of Latin America, Africa, and Asia	Engages with a range of business sizes, primarily focusing on small to medium enterprises and cooperatives involved in agriculture.	Involved in numerous segments of the food value chains, such as crop production, agricultural technology, and sustainable farming systems, focusing on key crops like cassava, common beans, and tropical forages.	Provides research, development of new agricultural technologies, and innovations aimed at increasing the eco-efficiency of agriculture. This includes the development of climate-resilient crop varieties and sustainable farming practices.	Includes the dissemination of improved crop varieties, agricultural best practices training, and the development of tools and methodologies to enhance farm management and resilience to climate change.	1967	To reduce hunger and poverty, and improve human nutrition in the tropics through research aimed at increasing the eco-efficiency of agriculture.	none found	Collaborates with a wide range of international and national partners, including governments, academic institutions, and other research organizations to deliver its research and development programs.	Utilizes a comprehensive monitoring and evaluation system to track the effectiveness and impact of its research and interventions on agricultural productivity and sustainability.	Has played a crucial role in developing agricultural innovations that have substantially improved yields and sustainability in tropical agriculture.	Emphasizes the importance of collaborative research and the integration of modern technologies with traditional farming practices.	Supported by strong global partnerships and the integration of cutting-edge science in agriculture; however, challenges include adapting to the rapid changes in climate and the varied needs of tropical farmers.	CIAT is a leader in bean genome research, having contributed significantly to the understanding and improvement of bean varieties that are crucial for food security in many developing countries.	https://www.ciat.cgiar.org/
82	Food and Beverage Association of South Africa (FASA)	FASA supports food manufacturing businesses in South Africa through technical assistance, advocacy, and networking opportunities to promote growth, innovation, and competitiveness in the sector.	Primarily engages with companies within the food and beverage industry, including manufacturers, distributors, and retailers of non-alcoholic beverages.	Focuses on South Africa, supporting businesses across the nation in both urban and rural areas.	Engages with businesses of various sizes, from small local producers to large multinational corporations within the food and beverage sector.	Involved in various segments of the food and beverage value chains, such as production, processing, marketing, and distribution, particularly in the non-alcoholic beverage sector.	Offers advocacy, regulatory support, and representation. Works to foster a favorable business environment for the growth of the non-alcoholic beverage industry in South Africa.	Includes lobbying for industry-friendly policies, providing members with guidance on regulatory compliance, offering training programs, and facilitating industry-wide initiatives to enhance sustainability and health standards.	specific year not found	To represent and promote the interests of the non-alcoholic beverage industry, ensure fair regulations, and support the industry’s growth and sustainability in South Africa.	https://foodbev.co.za/wp-content/uploads/2024/01/Foodbev-SETA-2023_24-Strategic-Plan.pdf	Engages with industry stakeholders, government agencies, and other trade bodies to represent and advocate for the interests of its members.	Likely employs industry-standard practices for monitoring and evaluating the effectiveness of its advocacy and support programs, although specific details are not provided in the available resources.	Plays a crucial role in shaping industry regulations and standards, contributing to the development of the non-alcoholic beverage sector in South Africa.	Underscores the importance of active engagement and collaboration with government and regulatory bodies to effectively represent industry interests and drive positive changes.	Supported by a strong membership base and influential industry role; challenges may include navigating complex regulatory environments and aligning diverse member interests.	The organization is instrumental in negotiating industry standards and policies, ensuring that the non-alcoholic beverage industry remains robust and competitive within South Africa’s dynamic economic landscape.	https://www.bevsa.co.za/
83	Food Processing and Packaging Machinery Association (FPPMA)	FPPMA provides technical assistance and capacity-building support to food manufacturing businesses in Africa through training, technology transfer, and industry best practices to enhance efficiency and product quality.	Engages with manufacturers, suppliers, and service providers in the food processing and packaging machinery industry.	Supports companies primarily based in the UK, covering England, Wales, Scotland, and Northern Ireland.	Partners with businesses of all sizes within the industry, from small enterprises to large corporations.	Involved in the manufacturing segment of the food value chains, focusing on machinery that processes and packages various types of food products including fruits, vegetables, meats, and dairy products.	Provides industry representation, networking opportunities, technical standards development, training, and advocacy to improve business conditions and market access.	Includes organizing trade shows, providing market intelligence, advocating for industry standards, facilitating networking events, and offering training programs on new technologies and regulatory compliance.	The specific starting year is not detailed, but the organization has been operational for several decades.	To promote and expand the food processing and packaging machinery sector within the UK and internationally, ensuring technological advancement and sustainability in manufacturing practices.	none found	Engages through membership services, committee work, events, and collaborations with other industry bodies and stakeholders.	Likely utilizes industry feedback, membership engagement metrics, and event participation to monitor and evaluate the effectiveness of its initiatives and services.	Plays a key role in driving technological and business advancements within the sector, helping members to innovate and grow in competitive markets.	Emphasizes the importance of adapting to technological changes and maintaining high standards of safety and efficiency in machinery design and operation.	Progress is supported by a strong industrial base and active participation from industry members; challenges include adapting to fast-evolving technology and international competition.	The association is part of Automate UK, reflecting its commitment to driving automation and technological innovation in the food processing and packaging sectors.	https://www.ppma.co.uk/
84	International Finance Corporation (IFC)	IFC provides advisory services and technical assistance to food manufacturing businesses in Africa to improve operational efficiency, adopt sustainable practices, and access finance for expansion and modernization.	Engages with a wide array of private sector entities, including financial institutions, manufacturers, agribusinesses, infrastructure providers, and health and education services.	Operates globally with a focus on developing countries across Africa, Asia, Latin America, and Eastern Europe.	Works with a broad range of business sizes from small and medium enterprises (SMEs) to large multinational corporations.	Involved in agricultural and food value chains through investments that enhance agricultural productivity, market access, and food security. Supports projects in agri-processing, storage, and logistics.	Provides investment and advisory services to stimulate private investment and foster market development. This includes loans, equity investments, risk management products, and advice on business strategy and best practices.	Includes financing for capacity expansion, modernization of operations, development of new products, and enhancement of environmental and social sustainability practices. Also offers advisory services for improving operations, governance, and risk management.	1956	To advance economic development by encouraging the growth of productive private enterprise in member countries, particularly in less developed areas, aiming to reduce poverty and improve people's lives.	https://www.ifc.org/content/dam/ifc/doclink/2023/ifc-strategy-and-business-outlook-fy24-26.pdf	Works through its investment and advisory arms to encourage private sector investment in developing countries by making finance more available and reducing risk for private investors.	Employs a robust monitoring and evaluation system to track the economic and social impact of its investments, focusing on sustainability and stakeholder engagement.	Has supported numerous projects that have led to significant job creation, improved infrastructure, and better access to essential services like healthcare and education.	Recognizes the importance of sustainability and risk management in investment projects. Has learned that engaging local stakeholders and incorporating environmental and social standards are crucial for the success of investments.	Supported by its extensive experience, global presence, and financial capacity; however, projects can be hindered by political and economic instability in target regions.	The IFC was established in 1956 as the first international financial institution to focus exclusively on the private sector in developing countries, pioneering blended finance models that combine private capital with philanthropic and government funds.	https://www.ifc.org/en/home

## Sheet: ATNI
Name of the initiative (led by NGOs, Public sector, UN etc.)	Brief description of the initiative	Lead Organizations	Overall goals (vision/mission)	Primary objective	Secondary objectives	Structure of the initiative	Countries of operation/Geographical scope	Target audience	Type of private sector engaged	Size of private sector engaged (Micro, small, medium, large, very large)	Support provided to the private sector	Details of support provided e.g. nutrition education, food safety training, digital tools etc.	Food value chains that the engaged private sector actors are operating in (e.g. fruits, vegetables etc.)	Donor/Funder of the initiative	Other financial details	Year Founded	Maturity stage (Nascent, Emerging, Established)	Terms of reference (Pls provide a link if available)	M&E framework (metrics of assessment)	Reported impact if any	Reported lessons learnt if any	Reported best practices	Factors supporting or hindering progress of the initiative	Relationship with other similar initiatives	Relationship with the government	Contact details of chair/leader (emails or linked in)	Notes (any interesting things on website)	Link	Interview questions
SUN Business Network (SBN)	World leading private sector platform focussed on nutrition. Global network of businesses committed to improving nutrition. Focuses specifically on mobilizing the private sector to contribute to improving nutrition outcomes. It encourages businesses to integrate nutrition considerations into their core operations, supply chains, and product offerings. By engaging the private sector, the network a…	GAIN & WFP	To reduce malnutrition in all its forms by fostering private sector engagement and action in nutrition, aligned with the SUN Movement's vision of a world free from malnutrition by 2030.	Drive Business Action - Businesses in SUN countries sustainably enhance and scale capacity and contributions to nutrition with a focus on safe, healthy, and affordable diets. Strengthen Business Accountability - National, collaborative mechanisms connect and support businesses to define and track nutrition actions, together with all relevant business and non-business stakeholders, including other…		At a global level, SBN acts as a mechanism for engaging multi-National Companies (MNCs) in nutrition and critically, for supporting national SBN networks to mobilize local businesses in line with national nutrition priorities and plans; Regionally, SBN Global Secretariat works through its team of strategically placed regional SBN focal points to strengthen strategic linkages and partnerships with…	Global		SBN engages a wide range of businesses from multinational companies to SMEs across the agri-food value chain. Global members - Arla foods, Amway, Ajinomoto, Aviario Paula,	Global Kenya	Advocacy and Awareness on the role of private sector for advancing nutrition Capacity Building and Technical Assistance Partnerships and Collaboration Monitoring and Evaluation	regional activities support increased focus on cultivating and disseminating key learnings and best practices within and between countries.	No specified chains; businessess of all varieites are invited to participate	The Ministry of Foreign Affairs for the Netherlands, Irish Aid, SUN Movement		2012	Established	https://scalingupnutrition.org/wp-content/uploads/2020/07/SUN-Strategy3_draft_MAIN-DOCUMENT_ENG.pdf	ENABLING BUSINESS TO ADVANCE NUTRITION INDEX '	No metrics provided; impacts likely have improved SME capabilites, gender priorities, and enhanced national level nutrition investment	No information found		No information found			https://www.linkedin.com/in/ritta-shine-8546aa49/?originalSubdomain=tz		https://sunbusinessnetwork.org
Alliance for a Green Revolution in Africa (AGRA)	AGRA is a partnership between the African Union and the Rockefeller Foundation that aims to catalyze agricultural transformation in Africa. It works with governments, farmers, civil society, and the private sector to increase agricultural productivity, improve market access, and enhance food security on the continent.	African Union and Rockefeller Foundation	Overarching goal is to double the yields and incomes of smallholder households in its focus countries, aiming to significantly increase food security and transform agriculture into a sustainable and profitable business for farmers.			Approach is characterized by working with large organizations in order to gain knowledge and create standardized agriculture solutions for smallhold farmers; then, provides farmers with the tools and expertise to impliment said solutions	Prioritized operations in 11 countries across different agro-ecological zones, including the Guinea Savannah and East African Highlands									2006	Established	https://agra.org/wp-content/uploads/2023/08/AGRAs-Five-Year-Strategy_Sustainably-Growing-Africas-Food-Systems.pdf	Includes the use of various monitoring and evaluation tools, as outlined in its publications, which include the Africa Agriculture Status Report and Food Security Monitor. These tools provide detailed assessments of the impact of AGRA's programs and the progress toward its targets	Please see annual report here: https://agra.org/wp-content/uploads/2023/11/AASR-2023.pdf	Please see annual report here: https://agra.org/wp-content/uploads/2023/11/AASR-2023.pdf		Please see annual report here: https://agra.org/wp-content/uploads/2023/11/AASR-2023.pdf				Also places emphasis on climate change adaptation, inclusivity, and improving nutrition.	https://agra.org
Access to Nutrition Initiative (ATNI)	ATNI assesses and ranks the world's largest food and beverage manufacturers on their contributions to addressing global nutrition challenges. It encourages companies to improve their products, practices, and policies to support healthy diets and combat malnutrition.	NA/Global nonprofit	A world where markets contribute to providing access to nutritious and affordable diets for all, aiming for at least half of all food & beverage sales to be derived from healthy products by 2030.	Mission: To transform markets so that at least half of companies’ food & beverage sales are derived from healthy products by 2030 and contribute to healthy, sustainable diets for all. To improve nutrition around the globe by assessing the private sector and driving companies to improve access to nutritious and affordable food. To accelerate sustainable access to nutritious and affordable foods	1. To measure and transform markets using tools and indexes. 2.To amplify impact using alliances. 3.To influence markets through innovation and thought leadership	Hosted by the Access to Nutrition Foundation, which is a registered charity in The Netherlands; diverse board of directors composed of industry professionals; two independent expert groups - one for overseeing ATNI's influence over market and company behaviour, another for their work on BMS and CF	At least 25	Investors, strategic allies,companies	Engages with the food and beverage industry, investors, policymakers, and strategic allies to drive improved nutritional outcome	The initiative engages with large multinational F&B companies, having assessed 252 companies and reviewed 66,104 products to gauge their impact on consumers' nutrition​	Provides benchmarking data and tools, advocates for nutrition-sensitive investments, and shapes policy formulation to support companies in delivering healthier diets​	Benchmarking and Indexing: Creating indexes like the Global Index, India Index, and UK Retailer Index to assess and rank F&B companies on their nutrition practices. Strategic Partnerships: Collaborating with investors, companies, and other stakeholders to foster healthier food markets​	Spans across various segments of the F&B industry, from baby food to general consumer products, focusing on improving nutritional content and accessibility	Bill & Melinda Gates foundation; WHO; UK Aid; Irish Aid; GAIN; PICTET; Rockefeller Foundation; Waterloo Foundation	See Annual Report 2020, 2021 and 2022	2013	Established	https://accesstonutrition.org/news/why-access-to-nutrition-initiatives-new-strategy-aims-to-transform-markets-for-healthier-food/	Utilizes various indexes and benchmarks, such as the Global Index, the India Index, and the UK Retailer Index, to assess and rank the world's largest food and beverage companies on their nutrition-related practices​	Some limited information in Annual reports and Impact stories. See impact stories here: https://accesstonutrition.org/old-impact/. info@accesstonutrition.org	No information found	None	One significant challenge is the lack of a standardized definition of "healthy" food, leading companies to apply varying criteria	World Benchmarking Alliance, Good Food Finance Network, Netherlands Working Group on International Nutrition, SDG2 Advocacy Hub, Food Action Alliance, GAIN, ShareAction, iGravity		https://www.linkedin.com/in/gsgarrett/?originalSubdomain=ch	Emphasizes accountability within the private sector for improving access to nutrition, using a variety of reports and tools to measure and encourage progress toward healthier products and practices.​ Potential interviewees (Executive Director, Data & MEL Senior Manager, Partnership Managers, Research Director, Responsible Investor Engagement Manager) see website: https://accesstonutrition.org/peo…	https://accesstonutrition.org/

## Sheet: BCtA
Name of the initiative (led by NGOs, Public sector, UN etc.)	Brief description of the initiative	Lead Organizations	Overall goals (vision/mission)	Primary objective	Secondary objectives	Structure of the initiative	Countries of operation/Geographical scope	Target audience	Type of private sector engaged	Size of private sector engaged (Micro, small, medium, large, very large)	Support provided to the private sector	Details of support provided e.g. nutrition education, food safety training, digital tools etc.	Food value chains that the engaged private sector actors are operating in (e.g. fruits, vegetables etc.)	Donor/Funder of the initiative	Other financial details	Year Founded	Maturity stage (Nascent, Emerging, Established)	Terms of reference (Pls provide a link if available)	M&E framework (metrics of assessment)	Reported impact if any	Reported lessons learnt if any	Reported best practices	Factors supporting or hindering progress of the initiative	Relationship with other similar initiatives	Relationship with the government	Contact details of chair/leader (emails or linked in)	Notes (any interesting things on website)	Link	Interview questions
Business Call to Action (BCtA)	BCtA is a global initiative that encourages businesses to develop innovative business models that contribute to the achievement of the Sustainable Development Goals (SDGs). It promotes inclusive business practices, including initiatives that improve access to nutritious food and address malnutrition in underserved communities	UNDP Initiative	Encourage businesses to take collective action to improve the lives of people in low- and middle-income markets and contribute to the Sustainable Development Goals			Businesses apply and must be accepted into the initiative; from there, BCA provides them with access them to the suite of tools and services that the BCA offers (impact measuring tool, SDG tracking tool, etc).	Over 200 company members in 67 countries	Companies	Works with businesses of all sizes that integrate low-income individuals in their core business as producers, suppliers, clients, customers, or employees	All sizes	Offers various services such as impact measurement and management, inclusive innovation journeys, and a corporate tracker for the Sustainable Development Goals. They provide training, direct technical assistance, mentorship, and workshops tailored to different sizes and sectors of organizations​	Offers a suite of management tools for corporate sponsors, such as impact measurement and management, SDG tracking, inclusive business management and tracking tools	No specified chains; businessess of all varieites are invited to participate	Asian Development Bank German Ministry for Economic Cooperation and Development Deutsche Gesellschaft für Internationale Zusammenarbeit (GIZ)	Available in Annual Report	Circa 2010	Established	No information found; however, as a UNDP initiative, the UNDP's strategic plan may be of use: https://www.undp.org/sites/g/files/zskgke326/files/2022-07/UNDP%20Strategic%20Plan%202022-2025.pdf	Said tools and services are assessment tools for organizations: impact measurement and management, SDG tracking, inclusive business management and tracking tools	Available in annual reports, mid-year reports and impact case studies	No information found	Kampala Principles on Effective Private Sector Engagement in Development Cooperation	No information found; insights would be derived by use of the available resources that BCA provides	Global Partnership for Effective Development Cooperation (GPEDC)	Swedish International Development Cooperation Agency, Ministry of Foreign Affairs of the Netherlands	https://www.linkedin.com/in/lucianaaguiar/	Supported by international partners like the Ministry of Foreign Affairs of the Netherlands, Swedish International Development Cooperation Agency, Asian Development Bank, among others. Potential interviewees (Program Manager, Impact Management Specialist, Social Impact Consultant ) see website: https://www.businesscalltoaction.org/about-bcta	https://www.businesscalltoaction.org
SUN Business Network (SBN)	World leading private sector platform focussed on nutrition. Global network of businesses committed to improving nutrition. Focuses specifically on mobilizing the private sector to contribute to improving nutrition outcomes. It encourages businesses to integrate nutrition considerations into their core operations, supply chains, and product offerings. By engaging the private sector, the network a…	GAIN & WFP	To reduce malnutrition in all its forms by fostering private sector engagement and action in nutrition, aligned with the SUN Movement's vision of a world free from malnutrition by 2030.	Drive Business Action - Businesses in SUN countries sustainably enhance and scale capacity and contributions to nutrition with a focus on safe, healthy, and affordable diets. Strengthen Business Accountability - National, collaborative mechanisms connect and support businesses to define and track nutrition actions, together with all relevant business and non-business stakeholders, including other…		At a global level, SBN acts as a mechanism for engaging multi-National Companies (MNCs) in nutrition and critically, for supporting national SBN networks to mobilize local businesses in line with national nutrition priorities and plans; Regionally, SBN Global Secretariat works through its team of strategically placed regional SBN focal points to strengthen strategic linkages and partnerships with…	Global		SBN engages a wide range of businesses from multinational companies to SMEs across the agri-food value chain. Global members - Arla foods, Amway, Ajinomoto, Aviario Paula,	Global Kenya	Advocacy and Awareness on the role of private sector for advancing nutrition Capacity Building and Technical Assistance Partnerships and Collaboration Monitoring and Evaluation	regional activities support increased focus on cultivating and disseminating key learnings and best practices within and between countries.	No specified chains; businessess of all varieites are invited to participate	The Ministry of Foreign Affairs for the Netherlands, Irish Aid, SUN Movement		2012	Established	https://scalingupnutrition.org/wp-content/uploads/2020/07/SUN-Strategy3_draft_MAIN-DOCUMENT_ENG.pdf	ENABLING BUSINESS TO ADVANCE NUTRITION INDEX '	No metrics provided; impacts likely have improved SME capabilites, gender priorities, and enhanced national level nutrition investment	No information found		No information found			https://www.linkedin.com/in/ritta-shine-8546aa49/?originalSubdomain=tz		https://sunbusinessnetwork.org
Alliance for a Green Revolution in Africa (AGRA)	AGRA is a partnership between the African Union and the Rockefeller Foundation that aims to catalyze agricultural transformation in Africa. It works with governments, farmers, civil society, and the private sector to increase agricultural productivity, improve market access, and enhance food security on the continent.	African Union and Rockefeller Foundation	Overarching goal is to double the yields and incomes of smallholder households in its focus countries, aiming to significantly increase food security and transform agriculture into a sustainable and profitable business for farmers.			Approach is characterized by working with large organizations in order to gain knowledge and create standardized agriculture solutions for smallhold farmers; then, provides farmers with the tools and expertise to impliment said solutions	Prioritized operations in 11 countries across different agro-ecological zones, including the Guinea Savannah and East African Highlands									2006	Established	https://agra.org/wp-content/uploads/2023/08/AGRAs-Five-Year-Strategy_Sustainably-Growing-Africas-Food-Systems.pdf	Includes the use of various monitoring and evaluation tools, as outlined in its publications, which include the Africa Agriculture Status Report and Food Security Monitor. These tools provide detailed assessments of the impact of AGRA's programs and the progress toward its targets	Please see annual report here: https://agra.org/wp-content/uploads/2023/11/AASR-2023.pdf	Please see annual report here: https://agra.org/wp-content/uploads/2023/11/AASR-2023.pdf		Please see annual report here: https://agra.org/wp-content/uploads/2023/11/AASR-2023.pdf				Also places emphasis on climate change adaptation, inclusivity, and improving nutrition.	https://agra.org

## Sheet: BPNR
Name of the initiative (led by NGOs, Public sector, UN etc.)	Brief description of the initiative	Lead Organizations	Overall goals (vision/mission)	Primary objective	Secondary objectives	Structure of the initiative	Countries of operation/Geographical scope	Target audience	Type of private sector engaged	Size of private sector engaged (Micro, small, medium, large, very large)	Support provided to the private sector	Details of support provided e.g. nutrition education, food safety training, digital tools etc.	Food value chains that the engaged private sector actors are operating in (e.g. fruits, vegetables etc.)	Donor/Funder of the initiative	Other financial details	Year Founded	Maturity stage (Nascent, Emerging, Established)	Terms of reference (Pls provide a link if available)	M&E framework (metrics of assessment)	Reported impact if any	Reported lessons learnt if any	Reported best practices	Factors supporting or hindering progress of the initiative	Relationship with other similar initiatives	Relationship with the government	Contact details of chair/leader (emails or linked in)	Notes (any interesting things on website)	Link	Interview questions
Business Platform for Nutrition Research (BPNR)	The Business Platform for Nutrition Research (BPNR), first announced at the Nutrition for Growth Summit of the G8 and formally launched at the UN General Assembly on September 23, 2013, is a multi-stakeholder platform for defining, funding and disseminating new research to improve nutrition in the developing world and for sharing existing knowledge which can impact the sector. Business Platform f…	Global Alliance for Improved Nutrition (GAIN)	Business Platform for Nutrition Research (the Platform) aims to address under-nutrition in developing countries.			No information found	Africa, regional (33.00%) America, regional (33.00%) Asia, regional (34.00%)	No information found	Food, pharmaceutical and ingredients companies	Large The founding companies: Ajinomoto Arla Foods BASF Britannia Royal DSM GlaxoSmithKline Mars Inc Nutriset PepsiCo Unilever Together with the Global Alliance for Improved Nutrition (GAIN), have committed to work in partnership in response to a clear need for new evidence to tackle the underlying causes of and solutions to global malnutrition.	Capacity building: Research Insights: The BPNR may provide businesses with access to the latest research findings and insights related to nutrition and its impact on various aspects of business operations, including product development, marketing strategies, and employee wellness programs. Technical Assistance: The BPNR might offer technical assistance to businesses seeking to implement nutrition…	The research streams include: (1) bioavailability, biomarkers and diagnostics to develop iron-fortified products and collect real time data on micronutrient deficiency; (2) integrated delivery models to develop new mechanisms for delivery of nutritious commodities to underserved populations; and (3) consumer behaviour change to define and develop cutting edge, cost-effective methodologies and too…	Not specified	Government of Canada	Not specified	2013	Established	No information found	The expected intermediate outcomes for the Business Platform for Nutrition Research include: (1) increased purchase and consumption of micronutrient-rich foods by the poor; and (2) improved ability to detect malnutrition risk and measure benefits of nutrition interventions. No more information found.	Defined: Specific research agenda Delivery model Governance structure Formally launched BPNR at the UN General Assembly in September 2013.	No more information found.	No more information found.	No more information found.	No more information found.	No more information found.	No more information found.		http://www.developmenthorizons.com/2017/06/innovative-funding-models-to-support.html https://globalnutritionreport.org/resources/nutrition-growth-commitment-tracking/global-alliance-for-improved-nutrition-gain/#:~:text=The%20Business%20Platform%20for%20Nutrition,research%20and%20development%20for%20nutrition. https://w05.international.gc.ca/projectbrowser-banqueprojets/project-projet/details/D000…

## Sheet: FS dashboard and FSCI
Name of the initiative (led by NGOs, Public sector, UN etc.)	Brief description of the initiative	Lead Organizations	Overall goals (vision/mission)	Primary objective	Secondary objectives	Structure of the initiative	Countries of operation/Geographical scope	Target audience	Type of private sector engaged	Size of private sector engaged (Micro, small, medium, large, very large)	Support provided to the private sector	Details of support provided e.g. nutrition education, food safety training, digital tools etc.	Food value chains that the engaged private sector actors are operating in (e.g. fruits, vegetables etc.)	Donor/Funder of the initiative	Other financial details	Year Founded	Maturity stage (Nascent, Emerging, Established)	Terms of reference (Pls provide a link if available)	M&E framework (metrics of assessment)	Reported impact if any	Reported lessons learnt if any	Reported best practices	Factors supporting or hindering progress of the initiative	Relationship with other similar initiatives	Relationship with the government	Contact details of chair/leader (emails or linked in)	Notes (any interesting things on website)	Link	Interview questions
Food system dashboard and Food System Countdown Initiative	The food systems dashboard- is an online dashboard which contains information on a wide range of food environment indicators. The information is primarly pulled from FAOSTAT data and is lagging with most data from 2021. The Food System Countdown Initiative is a newer initative that builds on the Food systems dashboard and involves many of the same groups. The FSCI is working to build a science-ba…	Food Systems Dashboard: GAIN, Coloumbia Climate School, FAO, Cornell	Food system dashboard: Food Systems Dashboard (FSD) brings together country-level data across all components of the food system and provides deeper analysis and guidance on how to use this data in meaningful ways. Food system countdown initiative: Accountability mechanism: Purpose is to produce annual publications to measure, assess, and track the performance of global food systems toward 2030 an…	FSD to provide data on a range of indicators at the country level - provides deeper analysis and guidance on how to use this data in meaningful ways.	FSCI to produce papers using FSD data to assess and track performance against SDGs	Food Systems dashboard is led by GAIN	Attempts to cover most countires	Anyone involved in the food system- but primarily policymakers- business leaders and entreprenurs are listed last on targe audience.	Although it is suggested that businesses might like to use the dashboard, there does not appear to be any direct engagement with the private sector. None are on the board.	Unknown	Data on a wide range of food system indicators. However most of these have not been updated since 2021 so are of questionable use for business planning.	Data is open access and could be used by anyone.		FSD: The Rockefeller Foundation, Federal Ministry of Economic Cooperation and Development (BMZ), Netherlands Ministry of Foreign Affairs, Swiss Agency for Development and Cooperation (SDC), Irish Aid International Development Research Centre (IDRC) FSCI: Not stated- as it involves the same groups and people assume it is the same funders. Federal Ministry of Economic Cooperation and Development (B…	Free to use	2020	Emerging	https://www.foodsystemsdashboard.org https://www.foodcountdown.org/indicator-architecture	In some ways the FSCI acts like an M&E framework for FSD. Both FSD and FSCI have their own conceptual frameworks.	FSCI has had some publications, but not much in the way of reported impact yet.	No information	No information	Lack of real time data in FSD	FSD and FSCI are interlinked.	FAO is involved, Many of the academics involved in the FSCI have links to government as advisors	FSD- Ty Beal- GAIN; FSCI- Jess Fanzo- Columbia	The list of experts on the FSCI is impressive and a who's who of food system researchers.	https://www.foodsystemsdashboard.org https://www.foodcountdown.org/indicator-architecture	? what is the role of the private sector in this iniative? Were private sector players consulted in the set up the initatives? Why is data so lagging? Who is responsible for updating it?

## Sheet: GNR
Name of the initiative (led by NGOs, Public sector, UN etc.)	Brief description of the initiative	Lead Organizations	Overall goals (vision/mission)	Primary objective	Secondary objectives	Structure of the initiative	Countries of operation/Geographical scope	Target audience	Type of private sector engaged	Size of private sector engaged (Micro, small, medium, large, very large)	Support provided to the private sector	Details of support provided e.g. nutrition education, food safety training, digital tools etc.	Food value chains that the engaged private sector actors are operating in (e.g. fruits, vegetables etc.)	Donor/Funder of the initiative	Other financial details	Year Founded	Maturity stage (Nascent, Emerging, Established)	Terms of reference (Pls provide a link if available)	M&E framework (metrics of assessment)	Reported impact if any	Reported lessons learnt if any	Reported best practices	Factors supporting or hindering progress of the initiative	Relationship with other similar initiatives	Relationship with the government	Contact details of chair/leader (emails or linked in)	Notes (any interesting things on website)	Link	Interview questions
Global Nutrition Report (GNR)	The world’s leading independent assessment of the state of global nutrition. It provides the best available data, in-depth analysis and expert opinion rooted in evidence to help drive action on nutrition where it is urgently needed. A multi-stakeholder initiative comprised of global institutions, the GNR is led by experts in the field of nutrition. The GNR was established in 2014 following the fi…	Path (Report host in 2023)	Vision: A world free from malnutrition in all its forms. Mission: The Global Nutrition Report drives greater action to end malnutrition in all its forms.	Goal: To inform, shape and inspire action with data and evidence on policy, practice and financing which result in greater accountability and progress in tackling poor diets and malnutrition globally. Goal 1: Stronger commitments: Stakeholders across sectors are enabled to develop ambitious, evidence-based and SMART nutrition commitments Goal 2: Stronger action: Stakeholders across sectors are en…	Through its role as an independent, credible and respected go-to global resource, and as the accountability mechanism for nutrition commitments, the GNR aims to: • Inform and inspire action by all nutrition stakeholders, including governments, donors, philanthropic organisations, civil society organisations, UN agencies and the private sector. • Shape debates and discussions, within both nutritio…	The Global Nutrition Report is a multi-stakeholder initiative, consisting of a Stakeholder Group, Independent Expert Group and Report Secretariat. The Stakeholder Group guides the commissioning and development of the Global Nutrition Report. This group comprises high-level members of government, donor organisations, civil society, multilateral organisations and the business sector. The Stakeholde…	Global	Primary audience The GNR aims to inform, empower and/or influence a wide audience – primarily targeting the policy and advocacy community at the global, regional and national level. Specifically: • Officials in governments at all levels who work to support improved nutrition and to end malnutrition. • Decision-makers in governments and multilateral organisations (e.g., UN agencies), and parliamen…	Private sector organisations including the food systems/production and agri-food industry.	The commitments are mostly from large organizations.	Inform, empower and influence Targeting these stakeholders enables GNR to drive commitments, action and accountability within and beyond the nutrition community.	Inform, empower and influence	Not mentioned	https://globalnutritionreport.org/about/donors/	Not mentioned	2014	Established (given that it has been around for 10 years)	https://globalnutritionreport.org/documents/657/Terms_of_reference_Global_Nutrition_Report_Independent_Expert_Group_70bzaKE.pdf	Monitoring and evaluation will be done to enable a continuous feedback loop that empowers the GNR to adjust, refine and strengthen its approach in real-time and to inform specific evaluation and learning moments. Based on this strategic vision, a results framework will be developed to monitor and evaluate GNR’s work. As part of this process, the strategic vision will also be periodically reviewed…	The GNR will also undertake research to understand how its content and products are being used by key stakeholders and target audiences. This will enable the GNR to gain a more detailed understanding of the objectives it is driving, and to capture important insights about how the GNR can be improved to best meet needs, and to most effectively contribute to efforts to end malnutrition in all its f…	Not mentioned	Not mentioned	Not mentioned	Not mentioned	Not mentioned		The GNR does not: • Directly advocate for nutrition action with specific stakeholders. • Directly hold actors to account through products and engagement with stakeholders. • Replace existing country-level data, evidence and reporting systems. • Build capacities of stakeholders.	https://globalnutritionreport.org/about/	Private sector representation in the stakeholder group? Another review assessment planned? Consolidate already existing commitments (e.g. Zero Hunger Private Sector Pledge) vs new commitments? Are these commitments additional or something that the company is any way doing? Impact on influencing the private sector? No new commitments since Nov 2022? Doe GNR convene private sector actors? What kind…

## Sheet: PSM
Name of the initiative (led by NGOs, Public sector, UN etc.)	Brief description of the initiative	Lead Organizations	Overall goals (vision/mission)	Primary objective	Secondary objectives	Structure of the initiative	Countries of operation/Geographical scope	Target audience	Type of private sector engaged	Size of private sector engaged (Micro, small, medium, large, very large)	Support provided to the private sector	Details of support provided e.g. nutrition education, food safety training, digital tools etc.	Food value chains that the engaged private sector actors are operating in (e.g. fruits, vegetables etc.)	Donor/Funder of the initiative	Other financial details	Year Founded	Maturity stage (Nascent, Emerging, Established)	Terms of reference (Pls provide a link if available)	M&E framework (metrics of assessment)	Reported impact if any	Reported lessons learnt if any	Reported best practices	Factors supporting or hindering progress of the initiative	Relationship with other similar initiatives	Relationship with the government	Contact details of chair/leader (emails or linked in)	Notes (any interesting things on website)	Link	Interview questions
Food and Agriculture Organization (FAO) Private Sector Mechanism/Private Sector Mechanism (PSM) to the United Nations Committee on World Food Security (CFS)	The FAO Private Sector Mechanism provides a platform for dialogue and collaboration between the FAO and the private sector on food security and nutrition issues. It engages businesses in policy discussions, partnerships, and initiatives to address hunger and malnutrition globally.	International Agri-Food Network	PSM’s mission aligns with that of the CFS, aiming to ensure food security and good nutrition for all, contributing to the achievement of the Sustainable Development Goals.	To facilitate collaboration and engagement between private-sector entities across the agri-food value chain. It provides a permanent seat for various stakeholders, including farmers, input providers, cooperatives, processors, small and medium-sized enterprises (SMEs), and food companies,	policy engagement- Policy work has included the Voluntary Guidelines on Responsible Governance of Tenure of Land, Fisheries, and Forests (VGGT, 2012), the Voluntary Guidelines on Food Systems and Nutrition (VGFSN, 2021), and CFS Policy Recommendations on the CFS Voluntary Guidelines on Gender Equality and Women’s and Girls’ Empowerment in the context of Food Secrity and Nutrition	Created by UN CFS; IAFN was elected to coordinate the PFS to operate as an open dialogue channel for all argicultural industry participants to engage with; board is compromised of private sector actors, Bill and Melinda Gates Foundation, civil society groups, research groups, and state members of the FAO	As a UN sub-organization, it operates globally	all actors in food value chains- including government	Engages with a diverse range of private sector entities across the agri-food value chain, from primary producers to large multinational corporations- however- Most SME enterprises are represented by other international organizations.	Mechanism encompasses entities of various sizes; however, seems to be mostly made up of international organization. The few multinationals that are on it are the usual big players- Nestle, Unilever, Pepsi co, Reckitt, Bayer etc. International trade associations and national associations (most North American Based) are also memebers as well as a few NGOs like sight and life (which is a foundation)…	Serves as a platform for dialogue and action, helping to connect the private sector with the United Nations’ efforts to secure global food security. Recent work	Facilitates the engagement of the private sector in CFS activities, promoting collaboration, policy development, and knowledge exchange aimed at enhancing food security and sustainable agriculture; involved in CFS workstreams like nutrition, women’s empowerment, youth in agriculture, etc	Encompasses the entire agri-food value chain, indicating involvement in sectors such as crop production, livestock, forestry, fisheries, and food processing and distributio	Major supporters listed: Abott Labrators; Bayer; Cargill; Danone; Export Trading Group; Federalimentare; Gallup; Global Agribusiness Alliance; IAFN; International Council of Beverage Associations; International Dairy Federation Mead Johnson Nutrition; Nestle; Pick Foundation; Piscari Industries; Rabobank; Sight & Life (DSM); Syngenta Crop Protection; Tetra Laval; USCIB; Unilever; Yara Internation…	membership is expensive…. You can be a 'supporting member' for 13K Euro, a contributor for 3K Euro or a non- paying member.	IAFN, the coordinating body of PSM, was established in 1996.	Established	https://agrifood.net/wp-content/uploads/2022/05/Brochure-2019-PSM-1.pdf	Contributes to and engages with the workstreams of the CFS, which includes various topics like nutrition, sustainable agricultural investment, and smallholder investment.	See annual reports: https://agrifood.net/psm/about/	See annual reports: https://agrifood.net/psm/about/		See annual reports: https://agrifood.net/psm/about/			Micheal Keller, Secretary-General of the International Seed Federation https://www.linkedin.com/in/michael-keller-b81365138/?originalSubdomain=ch	PSM has been an active participant in the annual sessions of the CFS, bringing together representatives from the private sector to engage in dialogue and contribute to the policy-making process	https://agrifood.net/psm	Is it only a discussion forum? What do members do on the macrocommittees? How have the priorities been picked? Why are some foundations and scholarship programs part of this? Why so many North American members- is it LMIC focused? What is its biggest success? Has this been effective? Why would this be part of world food forum?

## Sheet: SUN Business Network
Name of the initiative (led by NGOs, Public sector, UN etc.)	Brief description of the initiative	Lead Organizations	Overall goals (vision/mission)	Primary objective	Secondary objectives	Structure of the initiative	Countries of operation/Geographical scope	Target audience	Type of private sector engaged	Size of private sector engaged (Micro, small, medium, large, very large)	Support provided to the private sector	Details of support provided e.g. nutrition education, food safety training, digital tools etc.	Food value chains that the engaged private sector actors are operating in (e.g. fruits, vegetables etc.)	Donor/Funder of the initiative	Other financial details	Year Founded	Maturity stage (Nascent, Emerging, Established)	Terms of reference (Pls provide a link if available)	M&E framework (metrics of assessment)	Reported impact if any	Reported lessons learnt if any	Reported best practices	Factors supporting or hindering progress of the initiative	Relationship with other similar initiatives	Relationship with the government	Contact details of chair/leader (emails or linked in)	Notes (any interesting things on website)	Link	Interview questions
SUN Business Network (SBN) Global	Worlds leading private sector platform focussed on nutrition Only dedicated platform that convenes the private sector around nutrition across SUN countries Global network of businesses committed to improving nutrition. Focuses specifically on mobilizing the private sector to contribute to improving nutrition outcomes. It encourages businesses to integrate nutrition considerations into their core …	GAIN & WFP	SBN shares its vision with the overall SUN movement; By 2030, a world free of all forms of malnutrition. SBN’s overall vision is to reduce malnutrition in all its forms by bringing together the private sector, government, and other stakeholders to take joint, practical actions to accelerate private sector contributions to improved nutrition.	Drive Business Action - Businesses in SUN countries sustainably enhance and scale capacity and contributions to nutrition with a focus on safe, healthy, and affordable diets. Strengthen Business Accountability - National, collaborative mechanisms connect and support businesses to define and track nutrition actions, together with all relevant business and non-business stakeholders, including other…	Broker partnerships and collaborations	SBN Advisory Group - Provides strategic advice to the network and champions the role of the private sector in scaling up nutrition amongst the business community and the SUN Movement. The Advisory Group includes representatives from the public and private sectors (WFP, GAIN, SUN movement coordinator, BASF, Java Foods, Indo Foods, Royal DSM, Ajinomoto).Advisory Group members are appointed in their…	Global Regional National Uganda		For profit B2B - Arla food ingredients, Royal DSM, BASF, Stern Vitamin Food processors (everyday and therapeutic foods) - Amway, Ajinomoto, AVIARIO PAULA, Bel Group, Cargill, Hexagon Nutrition, House Food Group Inc., Kellog’s, Mars, Nutriset, Pepsico, Sproud Tetra Laval, Unilever, Valid Nutrition, VitaFoods Digital and mobile service providers - Every 1 Mobile, Orange Analytics and advisory - Gal…	Global - Multi national organizations Regional - Not found National - SMEs, women-led SMEs and large national companies	NATIONAL - Convening business via fit-for-purpose mechanisms that facilitate dialogue, collaboration, and learning among business in support of national nutrition priorities. Advance practical business solutions and support, to improve their business practices for nutrition - Facilitating access to finance, technologies, technical assistance, innovation, business partnerships, and strategic knowl…	Global - A mechanism for engaging multi-National Companies (MNCs) in nutrition (25 global MNC Network members). The network members make nutrition commitments, including on workforce nutrition, support national SBN networks to contribute towards national nutrition priorities and plans.	No specified chains, all food and non food businessess are invited to participate	The Ministry of Foreign Affairs for the Netherlands Irish Aid SUN Movement	Not found	2012	Established	Not found. SBN Strategy 3.0 (2022-2025) available	GLOBAL - Not found REGIONAL - Not found NATIONAL - To gain an understanding of progress being made by businesses in their nutrition commitments, most national SBN networks conduct an annual survey – taking note of whether they have made improvements to quality, pricing, and/or the volume of nutritious and safe foods. The survey also aims to collect insights on member partnerships facilitated by S…	GLOBAL - Not found REGIONAL - Not found NATIONAL - 2015 - 3 fully established and operational SBNs 2020 - 18 fully established country networks and 26 under development	GLOBAL - Not found REGIONAL - Not found	GLOBAL - Not found REGIONAL - Not found	GLOBAL - Not found REGIONAL - Not found	GLOBAL - Not found REGIONAL - Not found	SBN Advisory Group - Includes representatives from the public sectors (WFP, GAIN, SUN movement coordinator)	Global Coordinator - RITTA SHINE Global Partnerships - RUTH MUNYINYI Africa Regional Manager - MARGARET NGETHA Knowledge Leadership Senior Manager - CHRISTINA NYHUS DHILLON	Development of national SBNs is demand-driven which gives the SBN a ‘bottom-up’ focus and national ownership.	https://sunbusinessnetwork.org	Progress update of regional network? Kind of support - Types of technologies, technical assistance, innovation support provided by global members Impact - Pls give examples of SBN business members who are acting, investing, and innovating in responsible and sustainable actions to improve nutrition while balancing planetary health with human health/examples of meeting objectives/success examples a…
SBN Tanzania		GAIN & WFP		Improving nutrition polices and regulations. Working with the government and influential stakeholders to enhance these across the food industry. Increasing the availability of fortified products and supplements. To allow more individuals to obtain valuable nutrients that are key to fighting nutrition-related health concerns. Increasing business engagement in the nutrition sector. Improving awaren…		Advisory group formed of 11 senior business leaders in the food and nutrition sectors. Advise SBN Tanzania on its activities and recommend potential collaborations with private sector actors and the government to encourage further investments in enhanced nutrition. Spearheaded by a Co-ordinator who works closely with the country’s SUN Focal Person – who, in this instance, is the Director of Busin…					Technical and financial support to small- and medium-sized enterprises (SMEs) in the food sector to help them develop and make compelling changes. Facilitating private sector businesses with links to service providers, financial support services, and regulators.	NMB Bank: Helping SBN Tanzania provide SMEs with guidance to build their financial literacy. The Tanzania Agricultural Development Bank: Working with SBN Tanzania to support SMEs involved in the Lishe Accelerator Pitch Competition with improved access to financing. Sahara Ventures: Partnered with SBN Tanzania on the Lishe Accelerator Pitch Competition, an event aimed at connecting SMEs with techn…							Sahara Ventures: To improve the training and participant experience for each Lishe Accelerator cohort, Sahara Venture and SBN Tanzania, and the Global Alliance for Improved Nutrition (GAIN) co-organised an Accelerator Reflection Session with SMEs and judges at the end of every competition. Feedback has included the need to extend the programme duration, and include more peer-to-peer learning oppo…	Nine years since launching Delco Limited, a dairy business and member of the Scaling Up Nutrition Business Network (SBN) Tanzania, Delphinius Penessis has transformed it from a cheese making enterprise into a successful yoghurt and fermented milk processing brand that has captured the markets and hearts of rural Tanzanians. The School Feeding Initiative (PANITA): SBN Tanzania provided schools wit…	Sahara Ventures: In the wake of COVID-19, Sahara Ventures and SBN Tanzania are also looking to revise the training modules to enable SMEs to adopt new approaches to build their resilience post-pandemic. The project should look into launching an incubation programme to support start-ups, as most are not developed enough to qualify for the investment-readiness programme. To make the competition inc…	The School Feeding Initiative: Involving all players, including children, their parents, schools, and food suppliers, has also created ripple effects beyond the initiative, as they are able to spread the nutrition message in their communities, and the suppliers have now embraced fortification in their other ventures. Sahara Ventures: The project is already seeking to work with partners such as Th…			The School Feeding Initiative: A key factor in successful implementation was the involvement of the government at both the national and grassroots level. This ensured governments felt they were part of the project from its planning to its execution, and gave policymakers a chance to establish commitments in their zones to ensure access to nutrition for all	SBN National Coordinator - Ms Haika Malleko, hmalleko@gainhealth.org			Latest strategy M&E reports
SBN Nigeria
SBN Ethiopia

[truncated: 1 more sheets: Zero Hunger PS Pledge]
